1 ***Cortex cis*-regulatory switches establish scale colour identity and pattern**  
2 **diversity in *Heliconius***

3

4 **Luca Livraghi<sup>1,2</sup>, Joseph J. Hanly<sup>1,2,3</sup>, Steven M. Van Belleghem<sup>4</sup>, Gabriela Montejo-Kovacevich<sup>1</sup>,**  
5 **Eva S. M. van der Heijden<sup>1,2</sup>, Ling Sheng Loh<sup>3</sup>, Anna Ren<sup>3</sup> Ian A. Warren<sup>1</sup>, James J. Lewis<sup>5</sup>,**  
6 **Carolina Concha<sup>2</sup>, Laura H. López<sup>1,2</sup>, Charlotte Wright<sup>1</sup>, Jonah M. Walker<sup>1</sup>, Jessica Foley<sup>2</sup>,**  
7 **Zachary H. Goldberg<sup>6</sup>, Henry Arenas-Castro<sup>2</sup>, Michael W. Perry<sup>6</sup>, Riccardo Papa<sup>4</sup>, Arnaud**  
8 **Martin<sup>3</sup>, W. Owen McMillan<sup>2</sup> and Chris D. Jiggins<sup>1,2</sup>**

9

10 **Author affiliations:**

- 11 1. Department of Zoology, University of Cambridge, Downing St., Cambridge, CB2 3EJ, UK  
12 2. Smithsonian Tropical Research Institute, Gamboa, Panama  
13 3. The George Washington University Department of Biological Sciences, Science and  
14 Engineering Hall 6000, 800 22<sup>nd</sup> St NW Washington, DC 20052, USA  
15 4. Department of Biology, Centre for Applied Tropical Ecology and Conservation, University of  
16 Puerto Rico, Rio Piedras, Puerto Rico  
17 5. Baker Institute for Animal Health, College of Veterinary Medicine, Cornell University, Ithaca,  
18 NY 14853  
19 6. Cell & Developmental Biology, Division of Biological Sciences, UC San Diego, La Jolla, CA

20

21 **Corresponding author:** Luca Livraghi, University of Cambridge, Cambridge, UK. Dept. of Zoology.  
22 [ll566@cam.ac.uk](mailto:ll566@cam.ac.uk).

23

24 **Keywords:**

25 Evolution, wing patterning, *cortex*, *Heliconius*, cell fate, CRISPR, *cis*-regulation, *ATAC-seq*.

## 26 **Abstract**

27 In *Heliconius* butterflies, wing pattern diversity is controlled by a few genes of large effect that regulate  
28 colour pattern switches between morphs and species across a large mimetic radiation. One of these  
29 genes, *cortex*, has been repeatedly associated with colour pattern evolution in butterflies. Here we  
30 carried out CRISPR knock-outs in multiple *Heliconius* species and show that *cortex* is a major  
31 determinant of scale cell identity. Chromatin accessibility profiling and introgression scans identified  
32 *cis*-regulatory regions associated with discrete phenotypic switches. CRISPR perturbation of these  
33 regions in black hindwing genotypes recreated a yellow bar, revealing their spatially limited activity.  
34 In the *H. melpomene/timareta* lineage, the candidate CRE from yellow-barred phenotype morphs is  
35 interrupted by a transposable element, suggesting that *cis*-regulatory structural variation underlies these  
36 mimetic adaptations. Our work shows that *cortex* functionally controls scale colour fate and that its *cis*-  
37 regulatory regions control a phenotypic switch in a modular and pattern-specific fashion.

## 38 Introduction

39 Butterfly wing pattern diversity provides a window into the ways genetic changes underlie phenotypic  
40 variation that is spatially limited to specific parts or regions of the organism (McMillan et al., 2020;  
41 Orteu and Jiggins, 2020; Rebeiz et al., 2015). Many of the underlying genetic loci controlling  
42 differences in colour patterns have been mapped to homologous “hotspots” across disparate taxa. In some  
43 cases, this repeated adaptation has occurred through the alteration of downstream effector genes, such  
44 as pigment biosynthetic enzymes with functions clearly related to the trait under selection, for example,  
45 the genes *tan* and *ebony* that control insect melanin pigmentation (reviewed in Massey and Wittkopp,  
46 2016). In other cases, upstream regulatory genes are important, and these are typically either  
47 transcription factors (e.g. *optix*, *MITF*, *Sox10*) or components of signalling pathways such as ligands or  
48 receptors (e.g. *WntA*, *MC1R*, *Agouti*). These ‘developmental toolkit genes’ influence pigment cell fate  
49 decisions by modulating gene regulatory networks (GRNs) (Kronforst and Papa, 2015; Martin and  
50 Courtier-Orgogozo, 2017; Prud’homme et al., 2007), and are commonly characterised by highly  
51 conserved functions, with rapid evolutionary change occurring through regulatory fine-tuning of  
52 expression patterns. One gene that has been repeatedly implicated in morphological evolution but does  
53 not conform to this paradigm is *cortex*, a gene implicated by mapping approaches in the regulation of  
54 adaptive changes in the wing patterning of butterflies and moths.

55 *Cortex* is one of four major effect genes that act as switch loci controlling both scale structure and colour  
56 patterns in *Heliconius* butterflies, and has been repeatedly targeted by natural selection to drive  
57 differences in pigmentation (Nadeau, 2016; Van Belleghem et al., 2017). Three of the four major effect  
58 genes correspond to the prevailing paradigm of highly conserved patterning genes; the signalling ligand  
59 *WntA* (Martin et al., 2012; Mazo-Vargas et al., 2017) and two transcription factors *optix* (Lewis et al.,  
60 2019; Reed et al., 2011; Zhang et al., 2017) and *aristaless1* (Westerman et al., 2018). *Cortex*, on the  
61 other hand, is an insect-specific gene showing closest homology to the *cdc20/fizzy* family of cell cycle  
62 regulators (Chu et al., 2001; Nadeau et al., 2016; Pesin and Orr-Weaver, 2007). The lepidopteran  
63 orthologue of *cortex* displays rapid sequence evolution, and has acquired novel expression domains that  
64 correlate with melanic wing patterns in *Heliconius* (Nadeau et al., 2016; Saenko et al., 2019). It therefore  
65 seems likely that the role of *cortex* in regulating wing patterns has involved a major shift in function,  
66 which sits in contrast to the classic model of regulatory co-option of deeply conserved patterning genes.

67 The genetic locus containing *cortex* was originally identified in the genus *Heliconius* as controlling  
68 differences in yellow and white wing patterns in *H. melopomene* and *H. erato* (Figure 1, **a**) and the  
69 polymorphism in yellow, white, black and orange elements in *H. numata*. This was inferred using a  
70 combination of association mapping and gene expression data (Joron et al., 2006; Nadeau et al., 2016).  
71 The same locus has also been repeatedly implicated in controlling colour pattern variation among  
72 divergent Lepidoptera, including the peppered moth *Biston betularia* and other geometrids, the silkmoth

73 *Bombyx mori* and other butterflies such as *Junonia coenia*, *Bicyclus anynana* and *Papilio clytia*  
74 (Beldade et al., 2009; van der Burg et al., 2020; Ito et al., 2016; VanKuren et al., 2019; van't Hof et al.,  
75 2019; Van't Hof et al., 2016). This locus therefore contains one or more genes that have repeatedly been  
76 targeted throughout the evolutionary history of the Lepidoptera to generate phenotypic diversity.

77 In *Heliconius* butterflies, population genomic data suggest that *cis*-regulatory modules surrounding  
78 *cortex* underlie adaptive variation of yellow and white colour pattern elements (Enciso-Romero et al.,  
79 2017; Van Belleghem et al., 2017). These studies predict the existence of modular elements that  
80 compartmentalise expression of colour pattern genes across developing wings. However,  
81 developmental genes have complex regulatory domains and recent work has suggested that pleiotropy  
82 among different enhancers may be more common than is currently appreciated (Lewis et al., 2019;  
83 Murugesan et al., 2021). Further dissection of the regulatory elements controlling wing pattern variation  
84 is thus necessary to assess the relative contribution of pleiotropy versus modularity at colour pattern  
85 loci (Lewis and van Belleghem, 2020).

86 While fantastically diverse, most of the pattern variation in *Heliconius* is created by differences in the  
87 distribution of just three major scale cell types; Type I (yellow/white), Type II (black), and Type III  
88 (red/orange/brown) (Aymone et al., 2013; Gilbert et al., 1988). Each type has a characteristic  
89 nanostructure and a fixed complement of pigments. Type I yellow scales contain the ommochrome  
90 precursor 3-hydroxykynurenine (3-OHK) (Finkbeiner et al., 2017; Koch, 1993; Reed et al., 2008),  
91 whereas Type I white scales lack pigment, and the white colour is the result of the scale cell  
92 ultrastructure (i.e. structural white) (Gilbert et al., 1988). Structurally, Type I scales are characterised  
93 by the presence of a lamina covering the scale windows and by micro-ribs joining the larger longitudinal  
94 ridges. In contrast, Type II scale cells are pigmented with melanin, have larger crossribs and lack a  
95 lamina covering the scale windows. Quantitative variation in scale structures between populations (but  
96 not within individuals) can cause Type II scales to range from matte black to iridescent blue, (Brien et  
97 al., 2019; Parnell et al., 2018). Finally, Type III scale cells contain the red ommochrome pigments  
98 xanthommatin and dihydroxanthommatin and are characterised by larger spacing between cross-ribs  
99 and ridges.

100 Here we focus on the role of *cortex* in specifying these scale types in *Heliconius* butterflies, an adaptive  
101 radiation with over 400 different wing forms in 48 described species (Jiggins, 2017; Lamas, 2004) and  
102 where diversity in wing patterns can be directly linked to the selective forces of predation and sexual  
103 selection (Brown, 1981; Turner, 1981). Specifically, we combine expression profiling using *RNA-seq*,  
104 *ATAC-seq*, *in situ* hybridization and antibody staining experiments, as well as CRISPR/Cas9 gene  
105 knock-outs to determine the role that this locus plays in pattern variation of two co-mimetic morphs of  
106 *H. melpomene* and *H. erato* (Figure 1, **b**).

107 Despite *cortex* not following the prevailing paradigm of patterning loci, we demonstrate that the gene  
108 plays a fundamental role in pattern variation by modulating a switch from Type I scale cells to Type II  
109 and Type III scale cells. Moreover, we show that while the phenotypic effects of *cortex* extend across  
110 the entire fore- and hindwing surface, modular enhancers have evolved in two distantly related  
111 *Heliconius* species that control spatially restricted, pattern specific expression of *cortex*. Our findings,  
112 coupled with recent functional experiments on other *Heliconius* patterning loci, are beginning to  
113 illuminate how major patterning genes interact during development to determine scale cell fate and  
114 drive phenotypic variation across a remarkable adaptive radiation.

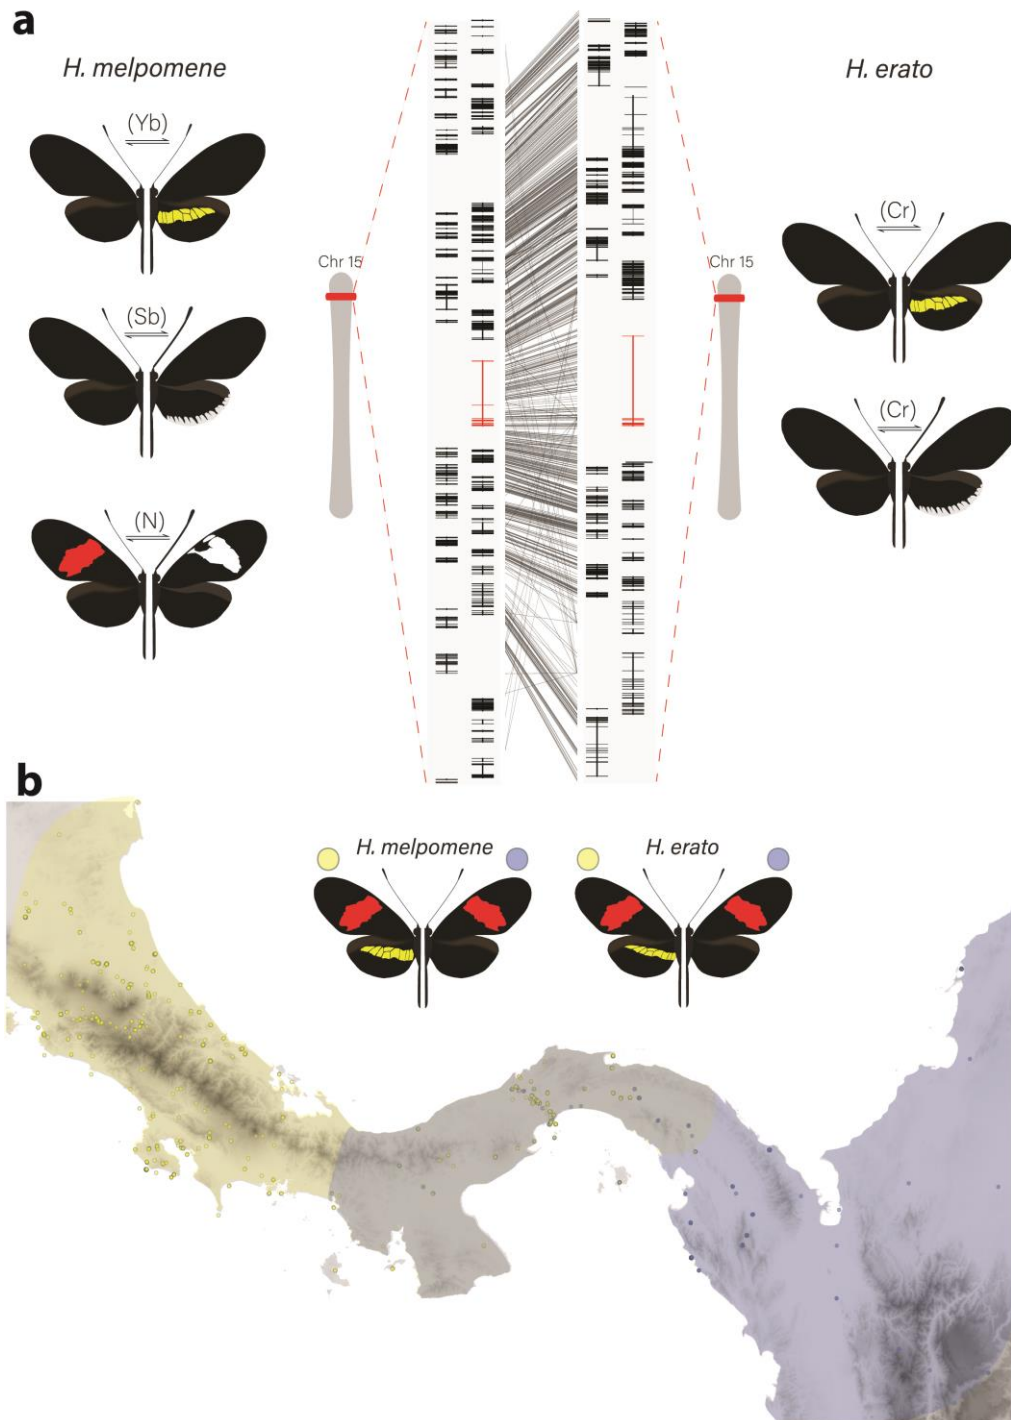

115

**Figure 1 – Phenotypic switches of yellow and white colour pattern elements are controlled by homologous loci in *Heliconius* species.**

(a) Homologous loci in both *H. erato* and *H. melpomene* are associated with variation in yellow and white patterns between morphs. In *H. melpomene* three tightly linked genetic elements located at chromosome 15 have been identified that control variation for the hindwing yellow bar, white margin elements and forewing band (Yb, Sb and N respectively) while in *H. erato* variation has been mapped to one element (Cr). The gene *cortex* is highlighted in red and alignment between the two co-mimetic species at the locus is shown (grey lines, 75% alignment identity). (b) Focal co-mimetic morphs of *H. erato* and *H. melpomene* used in this study, differing in the presence of a hindwing yellow bar, and their ranges across Central America are shown (ranges based on Rosser et al., 2012). Yellow: yellow banded morphs, blue: black hindwing morphs, grey: range overlap.

## 116 Results

### 117 The genes *cortex* and *domeless/washout* are differentially expressed between colour pattern 118 morphs, and between wing sections differing in the presence of the hindwing yellow bar

119 To identify genes associated with the yellow bar phenotype, we performed differential gene expression  
120 (DGE) analysis using developing hindwings sampled from colour pattern morphs in *H. erato* and *H.*  
121 *melpomene* differing only in the presence or absence of the hindwing yellow bar (Figure 1, **b** and Figure  
122 2, **a**). In total, we sequenced 18 samples representing three developmental stages (larval, 36h +/-1.5h  
123 (Day 1 pupae) and 60h +/- 1.5h (Day 2 pupae)) from two morphs in each of the two species, with  
124 hindwings divided into two parts for the pupal stages (Figure 2, **a**). We focused our attention on genes  
125 centred on a 47-gene interval on chromosome 15 previously identified as the minimal associated region  
126 with yellow band phenotypes by recombination and population genetic association mapping (Nadeau  
127 et al., 2016, supp table 1; Joron et al., 2006; Moest et al., 2020; Van Belleghem et al., 2017). Both our  
128 initial expression analysis and recent analysis of selective sweeps at this locus (Moest et al., 2020)  
129 indicate that three genes show differential expression and are likely targets of selection: *cortex*,  
130 *domeless* (*dome*) and *washout* (*wash*) (Figure 2, **c**). In *Heliconius*, *dome* appears to have duplicated in  
131 the ancestor of *H. erato* and *H. melpomene*, resulting in a full-length copy (referred to here as *domeless*)  
132 and a further copy exhibiting truncations at the C-terminus (*domeless-truncated*) (Supplementary File  
133 1 – Figure S1). Protein alignments indicate that in both *H. erato* and *H. melpomene*, *dome-trunc*  
134 maintains only the N-terminal half of the gene, suggesting *dome-trunc* is undergoing pseudogenisation.  
135 Transcriptomic evidence also indicates that *dome/wash* are transcribed as a single bi-cistronic gene (See  
136 supplementary File 2 for details and Lewis et al., 2020). Differential expression analysis was thus  
137 performed with *dome/wash* as a single annotation.

138 The two species were analysed separately, with both showing only *cortex* and *dome/wash* as  
139 significantly differentially expressed between morphs among the 47 genes in the candidate region, with  
140 *cortex* differential expression occurring earlier in development. In fifth instar larvae, *cortex* is  
141 differentially expressed in both species between the two colour pattern morphs, with *cortex* showing  
142 the highest adjusted *p*-value for any gene in the genome at this stage in *H. erato* (Figure 2, **c**).  
143 Interestingly, *cortex* transcripts were differentially expressed in opposite directions in the two species,  
144 with higher expression in the melanic hindwing morph in *H. melpomene*, and in the yellow banded  
145 morph in *H. erato*. We confirmed this pattern of expression through a SNP association analysis and RT-  
146 qPCR (Supplementary File 3). This pattern is reversed for *dome/wash* in Day 1 pupae, where a  
147 statistically higher proportion of transcripts are detected in *H. melpomene rosina* (yellow), and in *H.*  
148 *erato hydara* (melanic) (Supplementary File 4 – Tables S4.1 and S4.2). No differential expression of  
149 these genes was found at Day 2 pupae.

150 When comparing across hindwing sections differing for the yellow bar phenotype, 22 genes out of the  
151 associated 47-gene interval were differentially expressed at Day 1 between relevant wing sections in *H.*  
152 *melpomene*, including *cortex* and *dome/wash* (Supplementary File 4 – Figures S4.1 and S4.2). In  
153 contrast in *H. erato* Day 1 pupae, only *dome/wash* was differentially expressed. At Day 2 pupae, there  
154 were no differentially expressed genes in either species between relevant wing sections at this locus.

155 Given the strong support for the involvement of *cortex* in driving wing patterning differences, we re-  
156 analysed its phylogenetic relationship to other *cdc20* family genes with more extensive sampling than  
157 previous analyses (Nadeau et al., 2016). Our analysis finds strong monophyletic support for *cortex* as  
158 an insect-specific member of the *cdc20* family, with no clear *cortex* homologs found outside of the  
159 Neoptera (Supplementary File 5 – Figure S5.1). Branch lengths indicate *cortex* is evolving rapidly  
160 within the lineage, despite displaying conserved APC/C binding motifs, including the C-Box and IR  
161 tail (Supplementary File 5 – Figure S5.2) (Chu et al., 2001; Pesin and Orr-Weaver, 2007).

162 In summary, *cortex* is the most consistently differentially expressed gene and showed differential  
163 expression earlier in development as compared to the other candidate *dome/wash*. We therefore focus  
164 subsequent experiments on *cortex*, although at this stage we cannot rule out an additional role for  
165 *dome/wash* in yellow pattern specification.



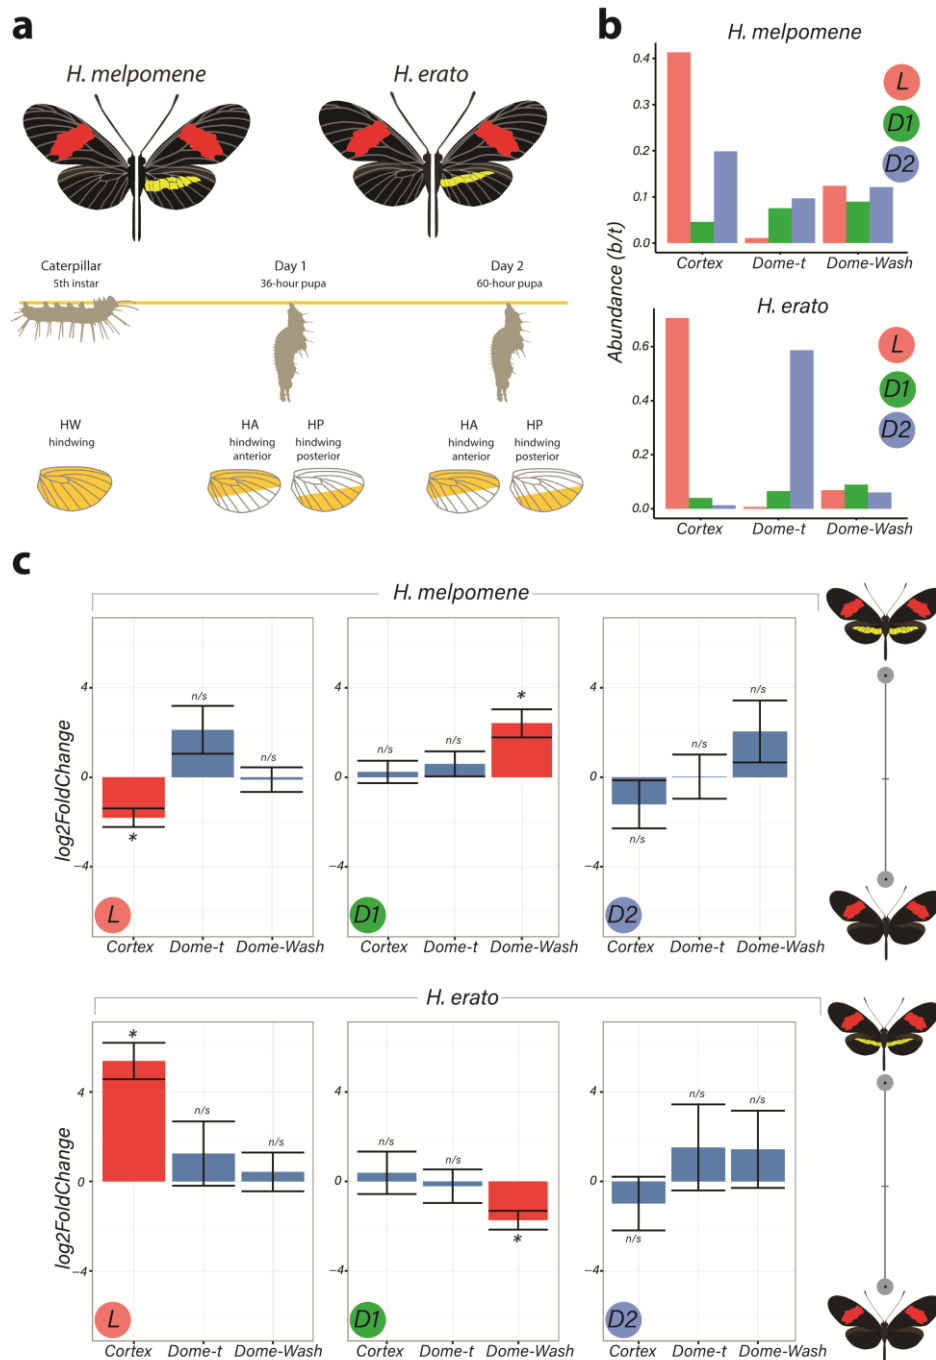

**Figure 2 – Differential expression of genes at Chromosome 15 implicate *cortex* as most likely candidate driving yellow bar differences**

(a) Hindwing tissue from co-mimetic morphs of *H. melpomene* and *H. erato* were collected at three developmental stages (5<sup>th</sup> instar caterpillar, Day 1 Pupae (36hAPF) and Day 2 Pupae (60hAPF)). For pupal tissue, hindwing tissue was dissected using the wing vein landmarks shown, corresponding to the future adult position of the hindwing yellow bar (dissection scheme based on Hanly et al., 2019). (b) Relative abundance of transcripts corresponding to the genes *cortex*, *domeless-truncated*, *domeless/washout* throughout developmental stages. (c) Log<sub>2</sub>FoldChange for the genes *cortex*, *domeless-truncated*, *domeless/washout* across developmental stages. Comparisons are for whole wing discs (Larvae, L) and across wing sections differing in the presence of a yellow bar in pupal wings (D1 and D2; see Supplementary File 4: Figure S4.3 for depiction of contrasts analysed). \* = adjusted p<0.05; n/s = not significant.

167 **Cortex transcripts localise distally in 5<sup>th</sup> instar larval wing discs**

168 Two studies have reported that *cortex* mRNA expression correlates with melanic patches in two species  
169 of *Heliconius* (Nadeau et al., 2016 and Saenko et al., 2019). To further assess this relationship between  
170 *cortex* expression and adult wing patterns, we performed *in situ* hybridisation on developing wing discs  
171 of 5<sup>th</sup> instar larvae, where we observed largest *cortex* transcript abundance, in both the yellow-barred  
172 and plain hindwing morphs of *H. erato* and *H. melpomene*. *Cortex* transcripts at this stage localised  
173 distally in forewings and hindwings of both species (Figure 3, Supplementary File 6 – Figure S6). In *H.*  
174 *erato demophoon* hindwings, expression was strongest at the intervein midline, but extends across vein  
175 compartments covering the distal portion of both forewing and hindwing (Figure 3, **a**). By contrast, in  
176 *H. erato hydara* hindwings, *cortex* transcripts are more strongly localised to the intervein midline  
177 forming a sharper intervein expression domain (Figure 3, **c**).

178 Expression in *H. melpomene rosina* is similar to *H. erato demophoon* at comparable developmental  
179 stages, again with stronger expression localised to the intervein midline but extending further  
180 proximally than in *H. erato demophoon* (Figure 3, **b**). In *H. melpomene melpomene*, hindwing *cortex*  
181 expression extends across most of the hindwing, and does not appear to be restricted to the intervein  
182 midline (Figure 3, **c**).

183 Given that *cortex* has been implicated in modulating wing patterns in many divergent lepidoptera, we  
184 also examined localisation in a *Heliconius* species displaying distinct patterns: *H. hecale melicerta*  
185 (Figure 3, **e**). Interestingly, in this species transcripts appear strongest in regions straddling the wing  
186 disc veins, with weak intervein expression observed only in the hindwings. Previous data has shown  
187 variation in yellow spots (Hspot) is also controlled by a locus located a chromosome 15 (Huber et al.,  
188 2015). Expression in *H. hecale melicerta* forewings corresponds to melanic regions located in between  
189 yellow spots at the wing margins, indicating *cortex* may be modulating Hspot variation in *H. hecale*.

190 Overall, our results suggest a less clear correlation to melanic elements than reported expression  
191 patterns (Nadeau et al., 2016; Saenko et al., 2019) where *cortex* expression in 5<sup>th</sup> instar caterpillars is  
192 mostly restricted to the distal regions of developing wings, but appears likely to be dynamic across 5<sup>th</sup>  
193 instar development (Supplementary File 6).

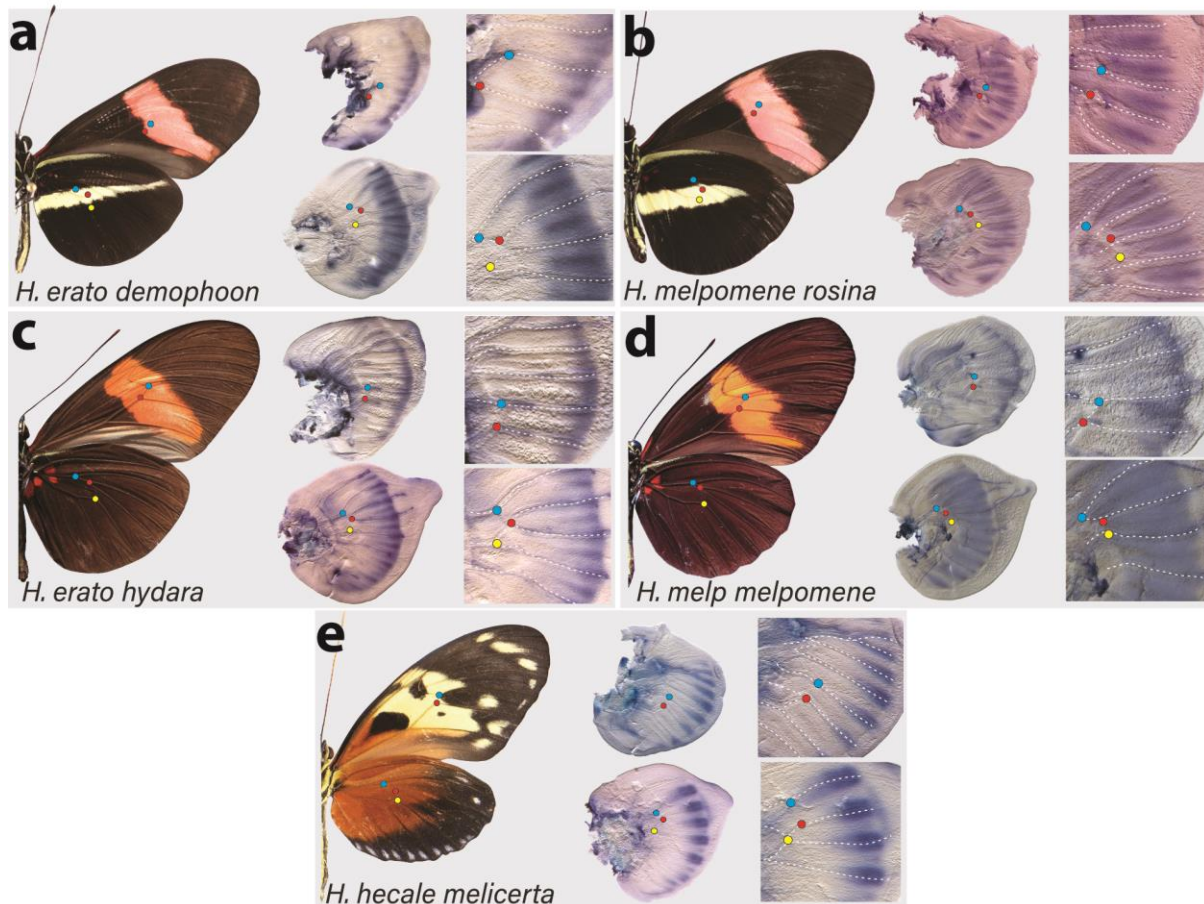

194

**Figure 3 – Expression of *cortex* transcripts in *Heliconius melpomene*, *Heliconius erato* and *Heliconius hecale* 5<sup>th</sup> instar wing discs.**

*Cortex* expression in 5<sup>th</sup> instar wing discs is restricted to the distal end of both forewings and hindwings in all species and morphs analysed. In *H. erato*, expression is strongest at the intervein midline but extends across vein compartments in *H. erato demophoon* (a), whereas it is more strongly localised to the intervein midline in *H. erato hydara* (c). In *H. melpomene rosina* (b), *cortex* localises in a similar manner to *H. erato demophoon*, with stronger expression again observed at the intervein midline, whereas expression in *H. melpomene melpomene* (d) extends more proximally. Expression in *H. hecale melicerta* (e) is strongest at the distal wing vein margins. Coloured dots represent homologous vein landmarks across the wings.

### 195 ***Cortex* establishes Type II and III scale identity in *Heliconius* butterflies**

196 To assay the function of *cortex* during wing development, we generated G<sub>0</sub> somatic mosaic mutants  
197 using CRISPR/Cas9 knock outs (crispants). We targeted multiple exons using a combination of  
198 different guides and genotyped the resulting mutants through PCR amplification, cloning and Sanger  
199 sequencing (Supplementary File 7 – Figure S7). Overall KO efficiency was low when compared to  
200 similar studies in *Heliconius* (Concha et al., 2019; Mazo-Vargas et al., 2017), with observed wing  
201 phenotype to hatched eggs ratios ranging from 0.3% to 4.8%. Lethality was also high, with hatched to  
202 adult ratios ranging from 8.1% to 29.8% (Supplementary File 8 – Table S8.1).

203 Targeting of the *cortex* gene in *H. erato* morphs produced patches of ectopic yellow and white scales  
204 spanning regions across both forewings and hindwings (Figure 4 and Supplementary File 9 – Figures

205 S9.1-S9.3). All colour pattern morphs were affected in a similar manner in *H. erato*. Mutant clones  
206 were not restricted to any specific wing region, affecting scales in both proximal and distal portions of  
207 wings. The same effect on scale pigmentation was also observed in *H. melpomene* morphs, with mutant  
208 clones affecting both distal and proximal regions in forewings and hindwings (Figure 5, **a-c**). In *H.*  
209 *erato hydara*, we recovered mutant individuals where clones also spanned the red forewing band  
210 (Figure 4, **b** and Supplementary File 9 - Figure S9.3). Clones affecting this region caused what appears  
211 to be an asymmetric deposition of pigment across the scales, as well as transformation to white,  
212 unpigmented scales (Supplementary File 10 – Figure S10).

213 As this locus has been associated with differences in white hindwing margin phenotypes (Jiggins and  
214 McMillan, 1997) (Figure 1, **b**), we also targeted *cortex* in mimetic morphs showing this phenotype, *H.*  
215 *erato cyrbia* and *H. melpomene cythera*. Mutant scales in these colour pattern morphs were also  
216 localised across both wing surfaces, with both white and yellow ectopic scales (Figure 4, **c** and Figure  
217 5, **c**). Both the white and blue colouration in these co-mimics is structurally derived, indicating that  
218 *cortex* loss-of-function phenotype also affects the scale ultrastructure. Furthermore, we observed a  
219 positional effect, where ectopic scales in the forewing and anterior compartment of the hindwing shifted  
220 to yellow, and posterior hindwing scales became white (Figure 4, **c** and Supplementary File 10 – Figure  
221 S10, **d**). This positional effect likely reflects differential uptake of the yellow pigment 3-OHK across  
222 the wing surface, which may be related to cryptic differential expression of the yellow-white switch  
223 *aristaless-1* (Reed et al., 2008; Westerman et al., 2018).

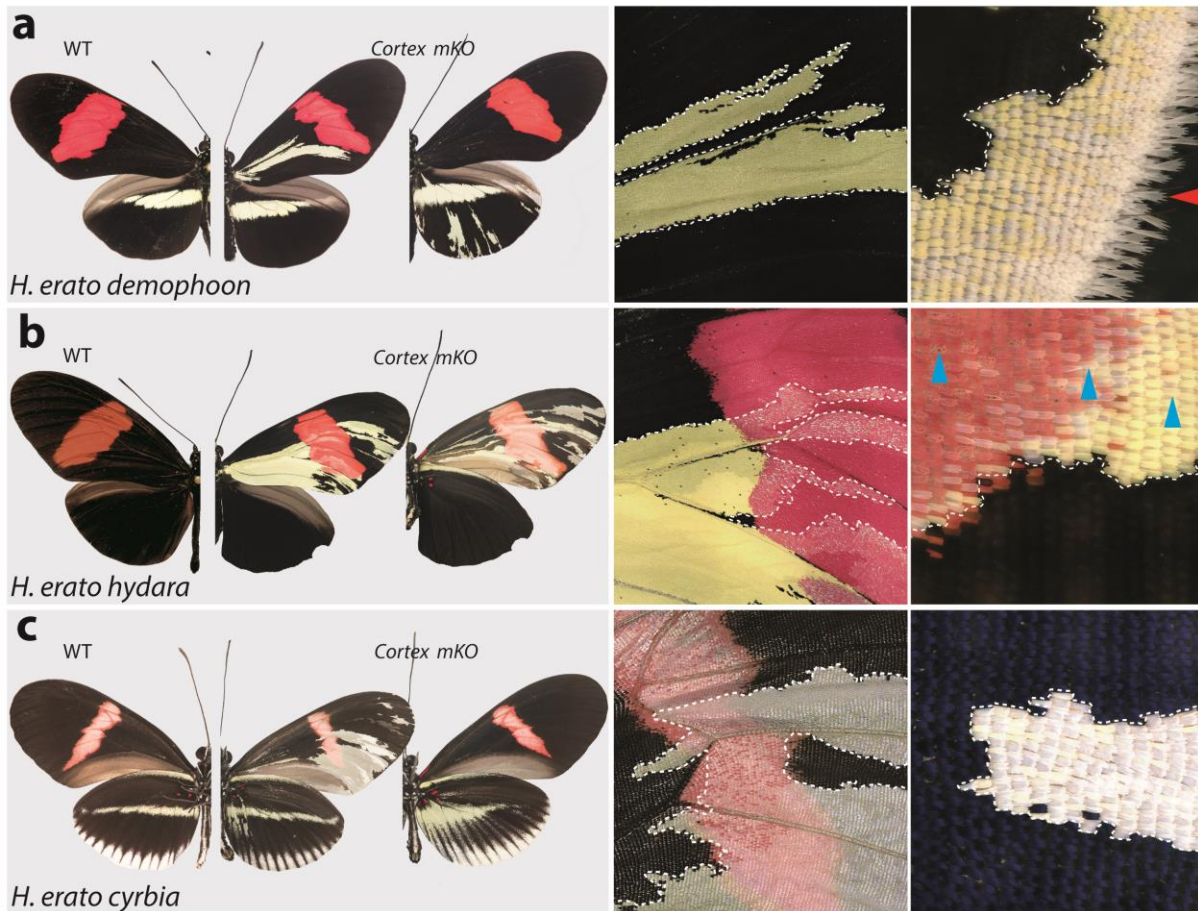

224

**Figure 4 – *Cortex* loss-of-function transforms scale identity across the entire wing surface of *Heliconius erato***

Phenotypes of *cortex* mKO across *H. erato* morphs reveals a loss of melanic (Type II) and red (Type III) scales, and transformation to Type I (yellow or white) scales. Affected regions are not spatially restricted, and span both distal and proximal portions of forewings and hindwings. The scale transformation extends to all scale types, including the wing border scales (red arrow head in (a)), and across the red band elements, where mutant scales transform to white, as well as some showing an intermediate phenotype (blue arrow heads in (b)). A positional effect is observed in some morphs, where ectopic Type I scales are either white or yellow depending on their position along the wing (*H. erato cyrbia*, (c)). Ectopic Type I scales can be induced from both melanic and red scales, switching to either white or yellow depending on wing position and morph. Boundaries between Wild-type (WT) to mutant scales are highlighted (dotted white line).

225

226 To further test the conservation of *cortex* function across the *Heliconius* radiation, as well as nymphalids  
227 as a whole, we knocked out *cortex* in *H. charithonia* and *H. hecale melicerta*, outgroups to *H. erato* and  
228 *H. melpomene* respectively and *Danaus plexippus* as an outgroup to all Heliconiini. Again, ectopic  
229 yellow and white scales appeared throughout the wing surface in all species, suggesting a conserved  
230 function with respect to scale development among butterflies (Figure 5, d-f and Supplementary File 9,  
231 Figures S9.6-S9.8).

232 In summary, *cortex* crispants appear to not be restricted to any specific wing pattern elements, and  
233 instead affect regions across the surface of both forewings and hindwings. Mutant scales are always  
234 Type I scales, with differing pigmentation (3-OHK, yellow) or structural colouration (white) depending

235 on morph and wing position. The high rate of mosaicism combined with high mortality rates suggests  
236 *cortex* is likely developmentally lethal. Furthermore, the sharp boundaries observed between wild-type  
237 and mutant scales suggest *cortex* functions in a cell-autonomous manner, with little or no  
238 communication between neighbouring cells (Supplementary File 10 - Figure 10).

239

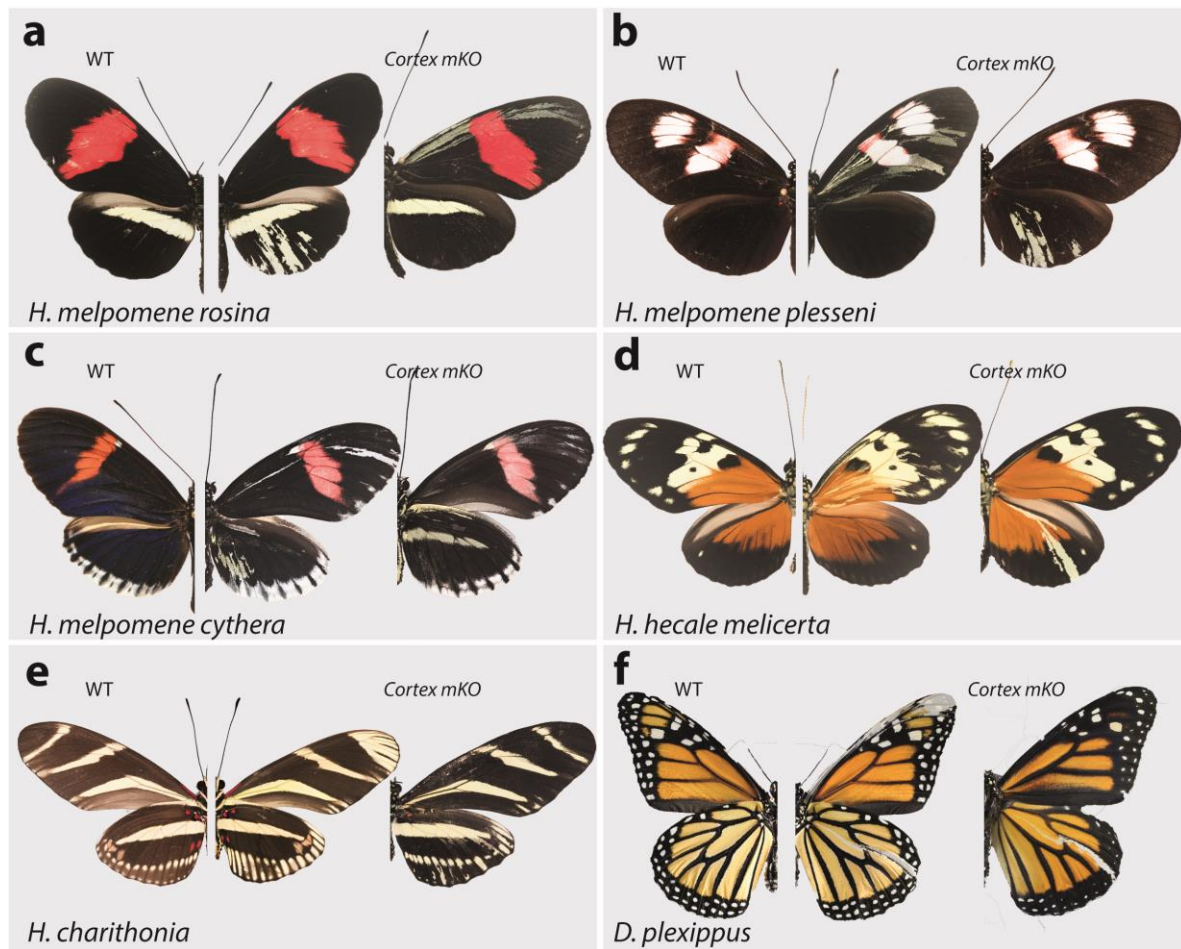

240

**Figure 5 – *Cortex* function is conserved across *Heliconius* and Nymphalids**

Phenotypes of *cortex* mKO across *H. melpomene* colour pattern morphs (a-c) reveal *cortex* has a conserved function in switching scale cell fates, as in *H. erato*. This function is also conserved in outgroups to *H. melpomene* and *H. erato* (*H. hecale melicerta* and *H. charithonia* respectively (d-e)) as well as in distantly diverged nymphalids (*D. plexippus* (f)). Left; wild-type, middle and right; *cortex* mKO.

241

242

243

## 244 Nuclear localization of Cortex protein extends across the wing surface in pupal wings

245 The *cortex* mRNA expression patterns in larval imaginal disks suggest a dynamic progression in the  
246 distal regions, and in a few cases (Figure 3; Nadeau et al., 2016; Saenko et al., 2019) a correlation with  
247 melanic patterns whose polymorphisms associate with genetic variation at the *cortex* locus itself. We  
248 thus initially hypothesized that like for the *WntA* mimicry gene (Martin et al., 2012, Mazo-Vargas 2017  
249 et al., Concha et al., 2020), the larval expression domains of *cortex* would delimit the wing territories  
250 where it is playing an active role in colour patterning. However, our CRISPR based loss-of-function  
251 experiments challenge that hypothesis because in all the morphs that we assayed, we found mutant  
252 scales across the wing surface.

253 This led us to re-examine our model and consider that post-larval stages of *cortex* expression could  
254 reconcile the observation of scale phenotypes across the entire wing, rather than in limited areas of the  
255 wing patterns. To test this hypothesis, we developed a Cortex polyclonal antibody, and found nuclear  
256 expression across the epithelium of *H. erato demophoon* pupal hindwings without restriction to specific  
257 pattern elements (Figure 6). In 5<sup>th</sup> instar larvae, Cortex protein was detected in a similar pattern to  
258 mRNA, with expression visible at the intervein midline of developing wings (Figure 6, **a**). Cortex was  
259 then detected across the entire wing surface from 24h after pupal formation (a.p.f), until 80h a.p.f in our  
260 time series (Figure 6, **b-d** and Supplementary File 11 - Figure S11). Localisation remained nuclear  
261 throughout development and appears equal in intensity across hindwing colour pattern elements (Figure  
262 6, **e**).

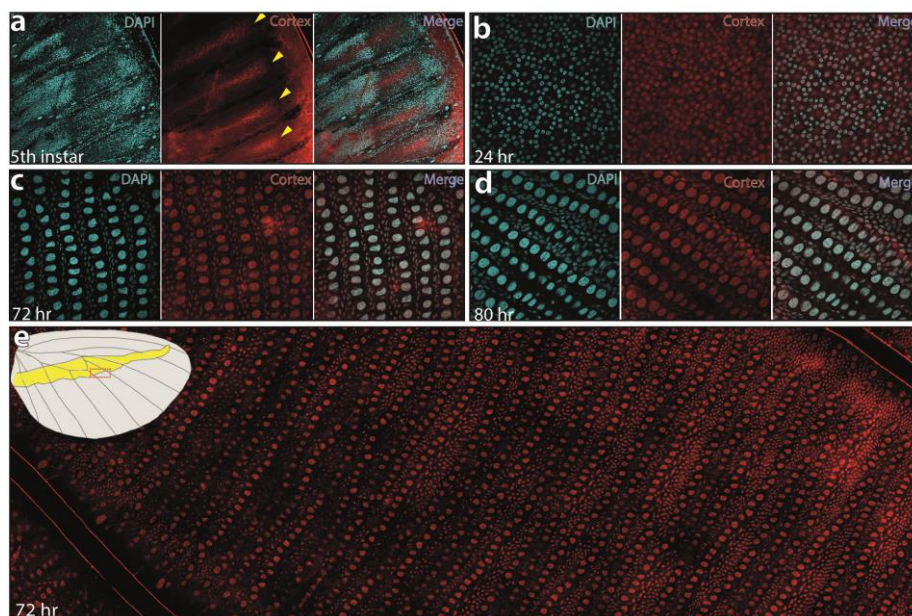

263

**Figure 6 – Cortex protein localises across the wings in *H. erato demophoon*.**

Cortex protein is localised at the distal intervein midline in 5<sup>th</sup> instar wing discs (**a**). At 24h a.p.f, the protein is detected across the wing, and localised strongly to the cell nuclei (**b**). This localisation continues at 72hr a.p.f (**c**) and 80 a.p.f (**d**). No appreciable difference in localisation is detected across presumptive pattern elements (**e**).

264 **Modular *cis*-regulatory elements drive the evolution of the mimetic yellow bar**

265 Given the broad effect observed for *cortex* across both wing surfaces, we next tested whether specific  
266 expression might be under the control of pattern specific *cis*-regulatory elements (CREs). In order to  
267 look for potential CREs, we performed an Assay for Transposase-Accessible Chromatin using  
268 sequencing (*ATAC-seq*) in 5<sup>th</sup> instar hindwings of both co-mimetic morphs differing in the presence of  
269 the yellow bar in *H. erato* and *H. melpomene*. We observed many accessible chromatin “peaks”  
270 surrounding *cortex* (Supplementary File 12 – Figure S12), each of which could represent a potentially  
271 active CRE. To narrow down candidate peaks that could be regulating *cortex* in a pattern specific  
272 manner, we overlaid association intervals with the *ATAC-seq* signals, which indicate evolved regions  
273 between populations of *H. melpomene* differing in the hindwing yellow bar phenotype. Specifically, we  
274 applied the phylogenetic weighting strategy Twisst (topology weighting by iterative sampling of  
275 subtrees; Martin and Belleghem, 2017) to identify shared or conserved genomic intervals between sets  
276 of *H. melpomene* populations (obtained from Moest et al., 2020) with similar phenotypes around *cortex*.  
277 This method identified a strong signal of association ~8kb downstream of the annotated *cortex* stop  
278 codon, that overlapped with a clear *ATAC-seq* peak (Figure 7, **a-b** and Supplementary File 12 – Figure  
279 S12).

280 We next sought to knock out this CRE, by designing a pair of sgRNA guides flanking the *ATAC-seq*  
281 signal. We reasoned that since *cortex* controlled the switch to melanic scales across the entire wing,  
282 knocking-out an enhancer in the melanic morph (*H. melpomene melpomene*), or in F1 hybrids between  
283 *H. melpomene rosina* and *H. melpomene melpomene*, should result in the appearance of yellow scales  
284 in a yellow bar-like pattern. Indeed, upon KO of this CRE we recovered crispants consistent with a  
285 modular enhancer driving *cortex* expression in a yellow bar-specific pattern, with no clones exhibiting  
286 yellow scales extending out of the region that forms the yellow bar (Figure 7, **c** and Supplementary File  
287 9 Figure S9.8).

288 To test whether the same element was driving the evolution of the yellow bar phenotype in the co-  
289 mimetic morph of *H. erato*, we first targeted the homologous peak, which shares both 95% sequence  
290 identity with *H. melpomene*, as well as the presence of an accessible chromatin mark (Figure 7, **a**).  
291 While none of our CRISPR trials resulted in a visible phenotype at this locus (number of injected adults  
292 eclosed = 36), we did observe the presence of a further accessible region ~10kb 3’ of the *H. melpomene*  
293 conserved CRE. We reasoned that a different but positionally close peak could be driving the yellow  
294 bar phenotype in *H. erato*. Remarkably, targeting of this CRE resulted in a yellow bar phenotype in the  
295 melanic *H. erato hydara*, with no clones containing yellow scales extending beyond the region that  
296 forms the yellow bar (Figure 7, **c** and Supplementary File 9 Figure S9.9). Deletions at each of the loci  
297 were confirmed by PCR amplification, cloning and Sanger sequencing (Supplementary File 7 – Figure  
298 S7).



299 Finally, to confirm that the CREs were interacting with the *cortex* promoter, we took advantage of a  
300 previously published set of Hi-C samples in *H. erato* populations (Lewis et al., 2019), to check for  
301 enhancer/promoter interactions through the implementation of virtual 4C plots. For both CREs, we  
302 found a statistically significant interaction between CRE and promoter, indicating the observed effect  
303 is likely due to the CRE interacting with the *cortex* promoter, and not a different gene at the locus  
304 (Supplementary File 13 – Figure S13).

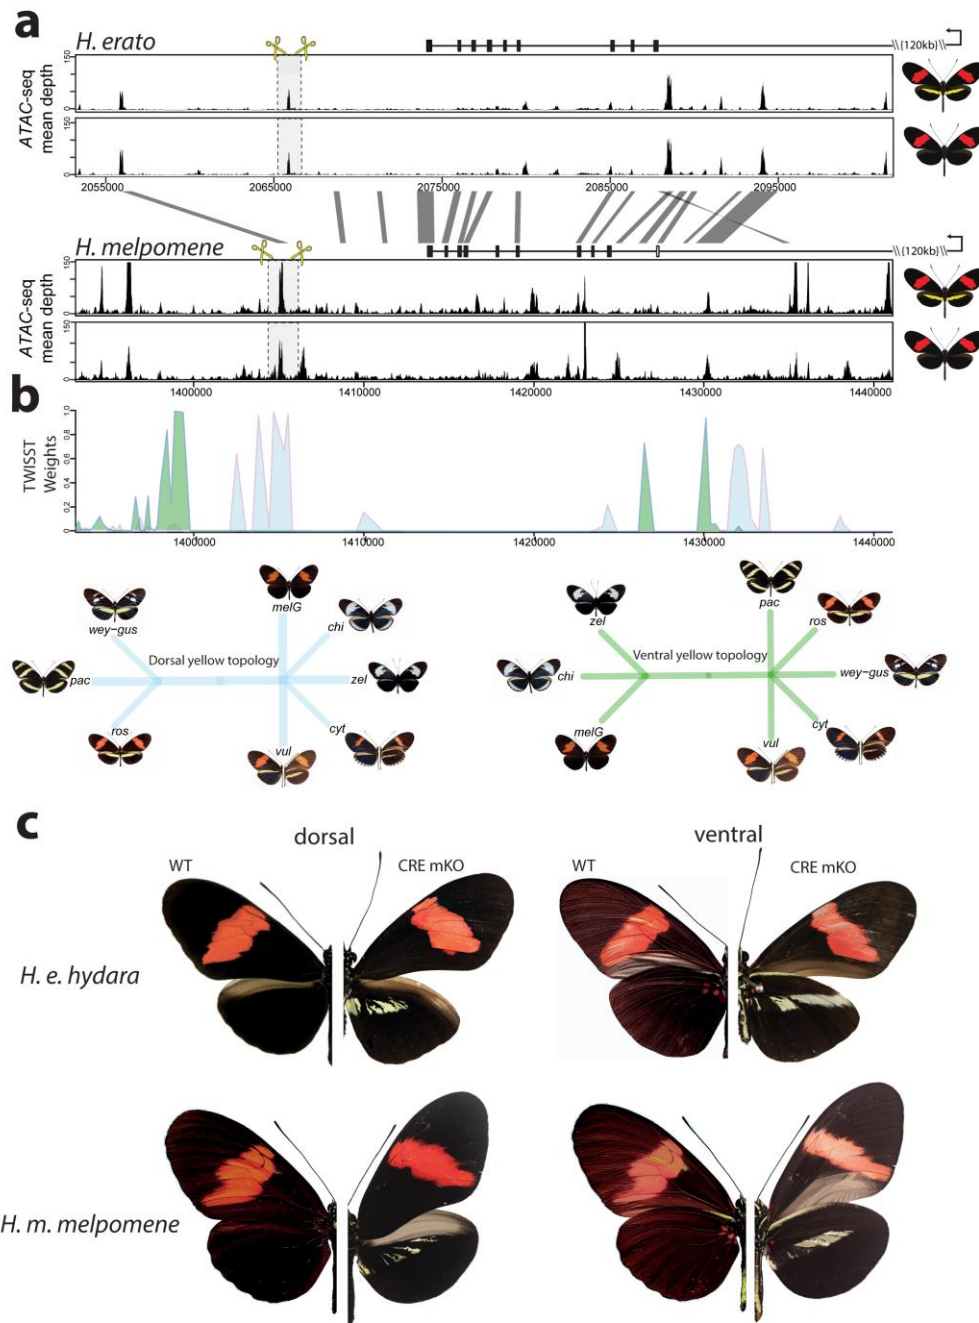

305

**Figure 7 – Modular CREs control the presence of the yellow band in *Heliconius melpomene* and *Heliconius erato*.**

(a) Chromatin accessibility as measured by mean sequence depth for ATAC-seq traces in *H. erato* (top) and *H. melpomene* (bottom) in 5<sup>th</sup> instar caterpillar hindwings in yellow banded and black morphs. The gene model for *cortex* is shown above the traces (black rectangles are coding exons, white rectangle non-coding exon, lines are introns, direction of transcription is indicated by an arrow). The transcription start site is around 120kb downstream). Positions of sgRNAs used for peak excision are shown (yellow scissors). Regions with >75% sequence identity between *H. melpomene* and *H. erato* are indicated by grey lines. (b) Twisst analysis results showing high genetic association for the presence of a yellow bar in *H. melpomene* populations with a ventral (ventral topology) or dorsal (dorsal topology) yellow bar. Abbreviations for twisst morphs: wey-gus = *H. cydno weymeri-gustavi*, chi = *H. cydno chioneus*, zel = *H. cydno zelinde*, pac = *H. pacheus*, ros = *H. melpomene rosina*, melG = *H. melpomene melpomene* French Guiana), vul = *H. melpomene vulcanus*, cyt = *H. melpomene cythera*. (c) *Cortex* loss-of-function at the yellow bar CREs affect scales only in the presumptive yellow bar region. CRE KO affects both dorsal (left) and ventral (right) hindwings.

306 **Transposable Element insertions are associated with the yellow bar phenotype in geographically**  
307 **distinct *H. melpomene* populations.**

308 Given that we were able to induce a yellow bar phenotype by the deletion of a modular CRE, we next  
309 asked whether natural populations with this phenotype might also show a similar deletion. To test for  
310 the presence of deletions at the candidate CRE, we used extensive publicly available whole genome re-  
311 sequence data for geographically isolated populations differing in the presence of the hindwing yellow  
312 bar (Darragh et al., 2019; Enciso-Romero et al., 2017; Kozak et al., 2018; Martin et al., 2019; Van  
313 Belleghem et al., 2017). In total, we assayed 16 geographically isolated subspecies across central and  
314 south America and looked for signature coverage drops at the targeted *ATAC-seq* peak, which could be  
315 indicative of deletions (Chan et al., 2010; Kempainen et al., 2021) (Supplementary File 14 – Table  
316 S14). We observed a characteristic drop in coverage at the targeted CRE in all *H. melpomene* and *H.*  
317 *timareta* morphs exhibiting a yellow bar phenotype, while no drop was detected in morphs with a  
318 melanic hindwing (Figure 8, a). Given this characteristic signature associated with the presence of a  
319 yellow bar in the sequencing data, we next genotyped across the putative deletion using Sanger  
320 sequencing in *H. melpomene rosina* and *H. melpomene melpomene* individuals. Surprisingly, we found  
321 two Transposable Element (TE) insertions in *H. melpomene rosina* with a Helitron-like TE found  
322 spanning the CRE peak, suggesting that the coverage drop is instead due to an insertion of repetitive  
323 sequence, rather than a deletion. Enhancer disruption is therefore likely caused by TE sequence in  
324 yellow bar morphs (Liu et al., 2019). We next assayed three other yellow barred morphs (*H. melpomene*  
325 *bellula*, *H. melpomene amaryllis* and *H. timareta tristero*), and found the same TE signatures in all three  
326 populations (Supplementary File 14 – Figure S14.2), suggesting the TE insertions are likely shared  
327 through introgression. No similar signature of reduced coverage was observed in co-mimetic morphs  
328 of *H. erato*, suggesting that sequence divergence is responsible for the evolution of the yellow bar CRE  
329 in this species (Supplementary File 14 – Figure S14).

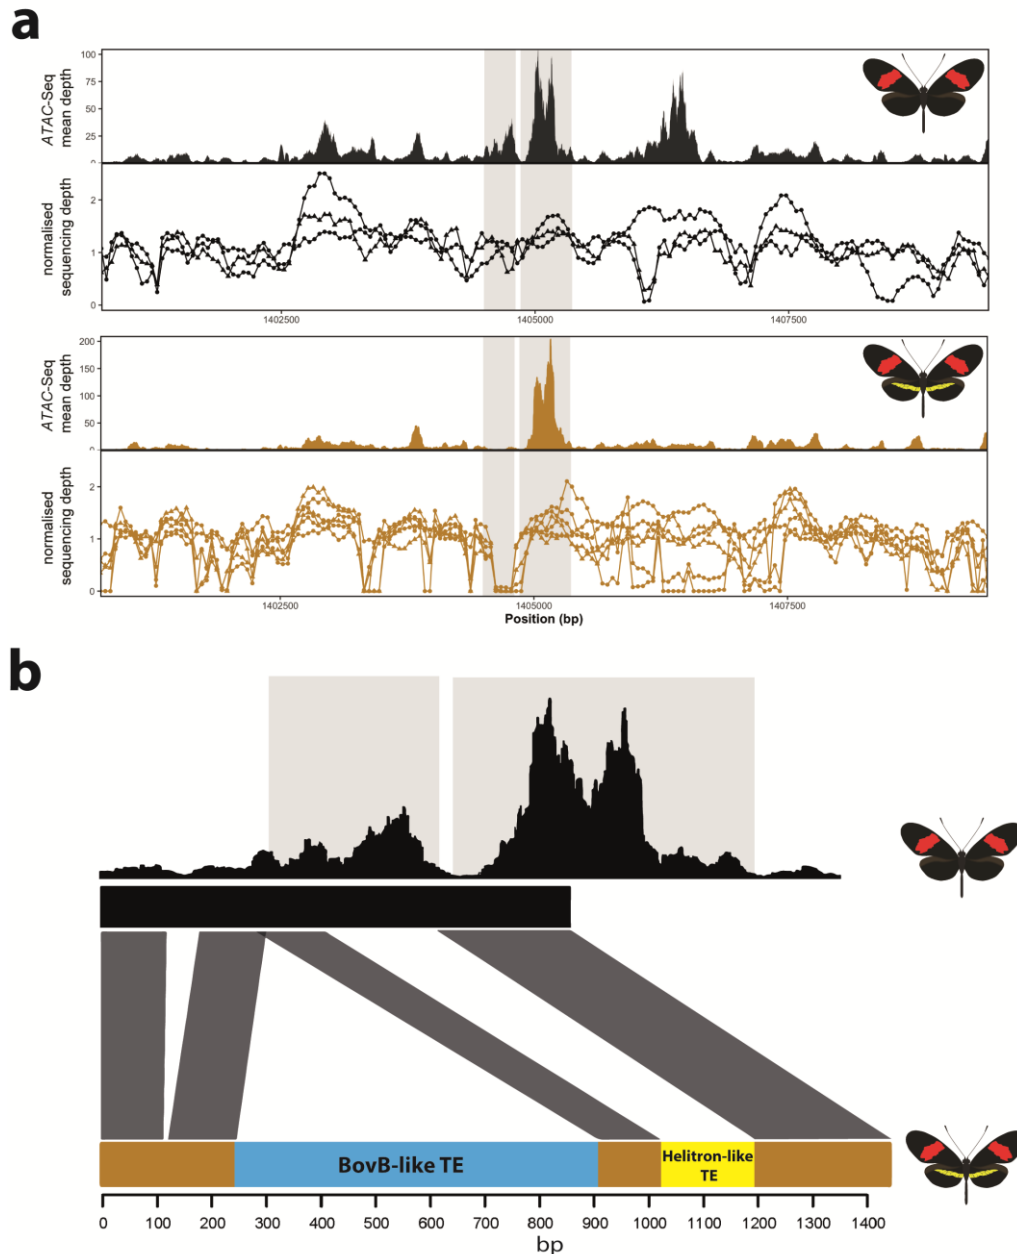

330

**Figure 8 – Coverage drop indicative of deletions in yellow barred populations of *H. melpomene***

(a) Mean sequence depth for ATAC-seq traces for the excised CRE are shown above normalised depth in sequencing coverage for populations of *H. melpomene* (circles) and *H. timareta* (triangles) differing for the presence of a yellow bar. Yellow barred populations display a drop in coverage for both ATAC signal and sequencing depth at a position corresponding to a portion of the targeted CRE (highlighted by the grey lines). Morphs analysed for melanic hindwing *H. melpomene* and *H. timareta*: *H. m. maletti*, *H. m. melpomene*, *H. t. florentia*. Morphs analysed for yellow barred *H. melpomene* and *H. timareta*: *H. m. bellula*, *H. m. amaryllis*, *H. m. rosina*, *H. m. burchelli*, *H. t. thelxione*, *H. t. tristero*. (b) Sanger sequencing of target regions in *H. m. melpomene* and *H. m. rosina* reveals an insertion of two TE elements surrounding the yellow bar CRE. A larger BovB-like element of 690bp (blue) and a smaller 163bp Helitron-like element (yellow) are present in the *H. m. rosina* sequences, but not the *H. m. melpomene* sequences. Base pair positions of the consensus Sanger sequencing traces are shown below.

331

332

333 ***Cortex* coding KO causes partial homeotic shifts in scale structure.**

334 Previous studies have shown an association between scale ultrastructure and pigmentation in *Heliconius*  
335 butterflies (Concha et al., 2019; Gilbert et al., 1987; Janssen et al., 2001; Zhang et al., 2017). In  
336 particular, it has been reported that perturbation by wounding transforms both the pigment content and  
337 structure of scales in a tightly coupled way (Janssen et al., 2001). We thus asked whether ectopic  
338 yellow/white scales generated through *cortex* knockout were accompanied by structural transformations  
339 using Scanning Electron Microscopy (SEM) in the same way as ectopic colour scales generated through  
340 wounding or *WntA* knockouts (Janssen et al, 2001; Concha et al., 2019). To account for known  
341 positional effects on scale structure we compared wild-type and mutant scales from homologous  
342 locations across the wing surface.

343 We observed ultrastructural shifts that are consistent with partial homeosis in *cortex* mutant scales in  
344 both *H. melpomene* and *H. erato* (Figure 9 and Supplementary File 15). In all cases where a yellow or  
345 white (Type I) clone was present in a region that would otherwise be black or blue (Type II) in the wild  
346 type, the ultrastructure of the scale was notably different. Wild type blue and black scales have crossribs  
347 at a spacing of  $\sim 0.6 \mu\text{m}$ , lack lamina between ridges and crossribs, and have no prominent microribs,  
348 while both wild-type and mutant Type I scales have no prominent crossribs, lamina that fills the spaces  
349 between the microribs and ridges, and prominent microribs at a spacing of  $\sim 0.2 \mu\text{m}$  (Figure 9, **a-d**, and  
350 Supplementary File 15). A consistent difference between all Type I scales (mutant and wild-type) is the  
351 presence of a lamina covering the inter-ridge space (Figure 9, **f**), suggesting this structure is an important  
352 morphological feature of yellow/white scales (Matsuoka and Monteiro, 2018), and that *cortex* is  
353 necessary for the development of lamellar structures in *Heliconius* scales.

354 Red scales (Type III) that are within a coding KO clone take on an aberrant structure and pigmentation.  
355 Scales were frequently found to be curled up laterally, and while ommochrome pigment is sometimes  
356 visibly deposited in the scale, it is granular in appearance rather than diffuse throughout the scale (Figure  
357 9, **e**). These ‘granular’ pigment accumulations could not be observed as a distinct structure by SEM,  
358 suggesting that they are under the surface of the scale. As with wild type and mutant Type I scales,  
359 prominent microribs can also be observed on these rolled scales, but due to the topological deformity  
360 of these scales it was not possible to take accurate measurements.

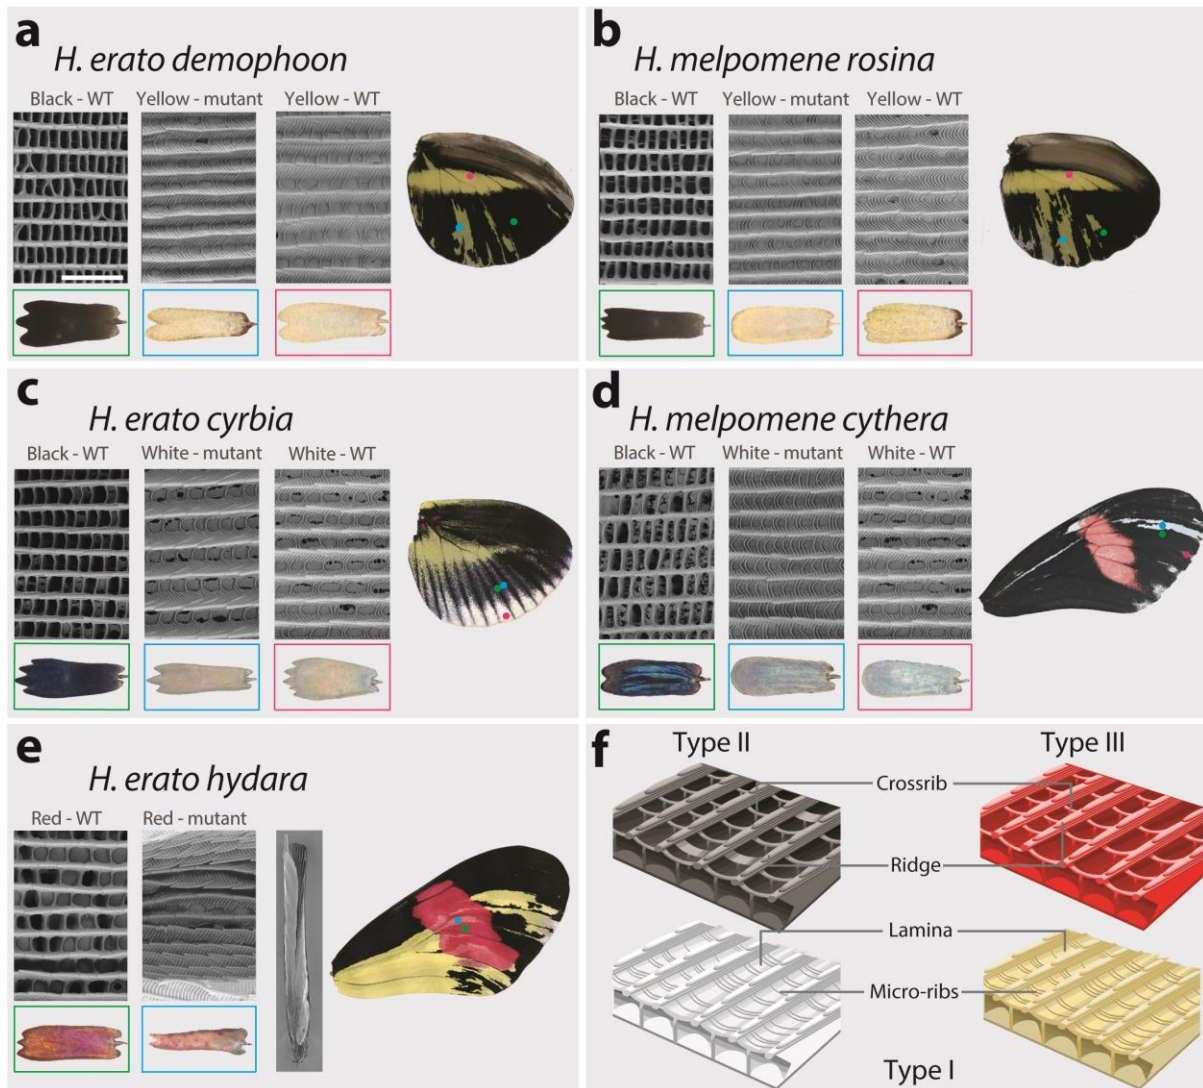

361

**Figure 9 – SEM reveals structural changes induced by *cortex* KO.**

Scanning electron microscopy images showing major differences between wild-type scales and mutant Type I yellow scales (a,b), Type I white scales (c,d) and Type III red scales (e). Cartoon depiction of scale ultrastructure illustrating differences between scale Types (f).

## 362 Discussion:

### 363 *Cortex* is a key scale cell specification gene

364 The genetic locus containing the gene *cortex* represents a remarkable case of convergent evolution,  
 365 where repeated and independent mutations surrounding the gene are associated with shifts in scale  
 366 pigmentation state in at least nine divergent species of Lepidoptera (Beldade et al., 2009; van der Burg  
 367 et al., 2020; Nadeau et al., 2016; Van Belleghem et al., 2017; VanKuren et al., 2019; van't Hof et al.,  
 368 2019; Van't Hof et al., 2016). While these studies have linked putative regulatory variation around  
 369 *cortex* to the evolution of wing patterns, its precise effect on scale cell identity and pigmentation has  
 370 remained speculative until now. Here, we demonstrate that *cortex* is a causative gene that specifies

371 melanic and red (Type II and Type III) scale cell identity in *Heliconius* and acts by influencing both  
372 downstream pigmentation pathways and scale cell ultrastructure. We also show that *cortex* is under the  
373 control of modular enhancers that appear to control the switch between mimetic yellow bar phenotypes  
374 in both *H. melpomene* and *H. erato*. Our combination of expression studies and functional knock-outs  
375 demonstrate that this gene acts as a key early scale cell specification switch across the wing surface of  
376 *Heliconius* butterflies, and thus has the potential to generate much broader pattern variation than  
377 previously described patterning genes.

378 While we have shown that *cortex* is a key scale cell specification gene, it remains unclear how a gene  
379 with homology to the *fizzy/cdc20* family of cell cycle regulators acts to modulate scale identity. In  
380 *Drosophila*, Fizzy proteins are known to regulate APC/C activity through the degradation of cyclins,  
381 leading to the arrest of mitosis (Raff et al., 2002). In particular, *fizzy-related* (*fzr*), induces a switch from  
382 the mitotic cycle to the endocycle, allowing the development of polyploid follicle cells in *Drosophila*  
383 ovaries (Schaeffer et al., 2004; Shcherbata, 2004). Similarly, *cortex* has been shown to downregulate  
384 cyclins during *Drosophila* female meiosis, through its interaction with the APC/C (Pesin and Orr-  
385 Weaver, 2007; Swan and Schüpbach, 2007). Immunostainings show that Cortex protein localises to the  
386 nucleus in *Heliconius* pupal wings, suggesting a possible interaction with the APC/C in butterfly scale  
387 building cells. Ploidy levels in Lepidoptera scale cells have been shown to correlate with pigmentation  
388 state, where increased ploidy and scale size lead to darker scales (Cho and Nijhout, 2013; Iwata and  
389 Otaki, 2016). *cortex* may thus be modulating ploidy levels by inducing endoreplication cycles in  
390 developing scale cells. However, we currently have no direct evidence for a causal relationship between  
391 ploidy state and pigmentation output, and a mechanistic understanding of this relationship and any role  
392 *cortex* may be playing in modulating ploidy levels will require future investigation.

393 A curious result reported from our *RNA-seq* dataset is that differential expression appears to occur in  
394 opposite directions between the two co-mimetic morphs. While this could represent some difference in  
395 the precise role of *cortex* between *H. melpomene* and *H. erato*, it may be more likely that this result  
396 reflects a dynamic expression of *cortex* in developing larval wings, in which case some relatively subtle  
397 developmental heterochrony between the two species would capture the state of differentially expressed  
398 genes in a different dynamic step.

399

#### 400 **The mimetic yellow bar phenotype switch is controlled by the evolution of modular enhancers**

401 In *H. melpomene*, we were able to narrow down a clear peak of association with the presence of  
402 accessible chromatin marks, and showed that KO of this region results in the appearance of a yellow  
403 bar phenotype in black hindwing morphs (Figure 7). Interestingly, when targeting the homologous peak  
404 in *H. erato*, we failed to recover any type of phenotype, but were able to induce the appearance of a

405 yellow bar through the targeting of an adjacent peak, not present in the *H. melpomene* datasets indicating  
406 that an independently evolved CRE is driving this phenotype in *H. erato*.

407 These results, coupled with the coding KOs, suggests that the CREs are enhancers that are able to drive  
408 *cortex* expression in a yellow bar specific manner. It is therefore puzzling that both the *in situ*  
409 hybridisation and antibody experiments failed to recover an association between Cortex localisation  
410 and the yellow bar phenotype. One possibility is that, because *cortex* is expressed throughout the wing,  
411 the differences in *cortex* expression that drive the pattern difference are either highly discrete in time  
412 and therefore hard to observe, or are the consequence of subtle changes in concentration that we could  
413 not detect with immunofluorescence. Moreover, *cortex* is known to have complex patterns of alternative  
414 splicing (Nadeau et al, 2016), suggesting that perhaps both our polyclonal antibody and *in situ* probes  
415 lack the specificity to detect localisation of specific alternatively spliced variants. This lack of a  
416 conspicuous link between expression and function is a puzzling result that will require further  
417 investigation in future. The ideal experiments would utilise the identified enhancers as enhancer traps,  
418 to show they are able to drive expression in a pattern specific manner, as well as perform knock-in  
419 experiments in the reciprocal co-mimetic morph, to show that these regions are sufficient to drive the  
420 phenotypic switches.

421 In *H. melpomene*, we found a clear association between the absence of an accessible chromatin peak in  
422 yellow barred populations with a characteristic drop in coverage over the same region, that overlaps  
423 with both the targeted CRISPR and association intervals. The mapped profiles show that this drop in  
424 coverage is explained by phenotype, rather than geography, in contrast to other adjacent regions. Upon  
425 further investigation, we found a large 690bp TE insertion 5' of the peak of interest as well as a Helitron-  
426 like sequence overlapping the peak in *H. melpomene rosina*. This raises the interesting possibility that  
427 this portion of the enhancer might contain the binding sites necessary to drive *cortex* in a yellow bar  
428 specific manner, and that recurrent TE insertions across this region are driving the evolution of this  
429 phenotype in *H. melpomene* populations. We also note that this insertion is observed in mimetic morphs  
430 of a different species, *H. timareta*, with which *H. melpomene* has previously been described to share  
431 regulatory regions at other patterning loci via adaptive introgression (Morris et al., 2019; Wallbank et  
432 al., 2016). Thus, adaptive introgression of this region and its structural variants is likely facilitating  
433 mimicry in this system (Dasmahapatra et al., 2012).

#### 434 ***Heliconius* wing patterning is controlled by interactions among major patterning genes**

435 Functional knockouts now exist for all the four major loci known to drive pigmentation differences in  
436 *Heliconius* (Mazo-Vargas et al., 2017; Westerman et al., 2018; Zhang et al., 2017). These loci represent  
437 the major switching points in the GRNs that are ultimately responsible for determining scales cell  
438 identity. This work underscores the importance of two patterning loci, *cortex* and *WntA*, as master  
439 regulators of scale cell identity. Both are upregulated early in wing development and have broad effects



440 on pattern variation (Concha et al., 2019; Nadeau et al., 2016). The signalling molecule *WntA* modulates  
441 forewing band shape in *Heliconius* by delineating boundaries around patterns elements, and is expressed  
442 in close association with future pattern elements (Concha et al., 2019; Martin et al., 2012). Unlike *cortex*  
443 mutants, *WntA* KOs shift scale cell identity to all three cell Types (I, II and III), depending on genetic  
444 background. Thus, *WntA* acts as a spatial patterning signal inducing or inhibiting colour in specific wing  
445 elements, in contrast to *cortex*, which acts as an “on-off” switch across all scales on the butterfly wing.

446 Interestingly, *cortex* knockouts lead to shifts in scale fate irrespective of *WntA* expression. This suggests  
447 *cortex* interacts with *WntA* to melanise a scale in the developing wing. In certain *H. erato* colour pattern  
448 *WntA* mutants, where even in putatively *cortex* positive regions, scales are able to shift to Type I in the  
449 absence of *WntA* alone (Concha et al., 2019). This indicates that while under certain conditions *cortex*  
450 is sufficient to induce the development of black scales, *WntA* is also required as a further signal for  
451 melanisation in some genetic backgrounds. Under this scenario, colour pattern morphs may be  
452 responding epistatically to different *WntA/cortex* alleles present in their respective genetic backgrounds.  
453 This is also consistent with genetic evidence for epistasis between these two loci seen in crossing  
454 experiments, whereby the yellow bar in *H. erato favorinus* results from an interaction between the  
455 *Cortex* and *WntA* loci (Mallet, 1989).

456 Under a simple model (Figure 10), *cortex* is one of the earliest regulators and sets scale differentiation  
457 to a specific pathway switches between Type I (yellow/white) and Type II/III (black/red) scales. Thus,  
458 we can envision a differentiating presumptive scale cell (PSC) receiving a *Cortex* input as becoming  
459 Type II/III competent, with complete Type III differentiation occurring in the presence of *optix*  
460 expression (Zhang et al., 2017). This is consistent with our data, which shows *cortex* is also required as  
461 a signal for Type III (red) scales to properly develop. Several *cortex* mutant individuals had clones  
462 across red pattern elements and failed to properly develop red pigment. The development of red scales  
463 in *Heliconius* butterflies is also dependent on expression of the transcription factor *optix* during mid-  
464 pupal development (Lewis et al., 2019; Reed et al., 2011; Zhang et al., 2017). Therefore, *cortex*  
465 expression is required for either downstream signalling to *optix*, or to induce a permissive scale  
466 morphology for the synthesis and deposition of red pigment in future scales. *Cortex* is thus necessary  
467 for the induction of Type III scale cells but insufficient for their proper development.

468 Conversely, a PSC lacking a *Cortex* input differentiates into a Type I scale, whose pigmentation state  
469 depends on the presence of the transcription factor *aristaless1* (*all*), where *all* is responsible for  
470 inducing a switch from yellow to white scales in *Heliconius* by affecting the deposition of the yellow  
471 pigment 3-OHK (Westerman et al., 2018). The uptake of 3-OHK from the haemolymph occurs very  
472 late in wing development, right before the adult ecloses (Reed et al., 2008). Our *cortex* crispants  
473 revealed a shift to both yellow and white scales, with their appearance being positionally dependent;  
474 more distally located scales generally switch to white, while more proximal scales become yellow

475 (Supplementary File 9 and 10). This pigmentation state is likely controlled by differences in *all*  
476 expression varying between wing sections in different ways across morphs.

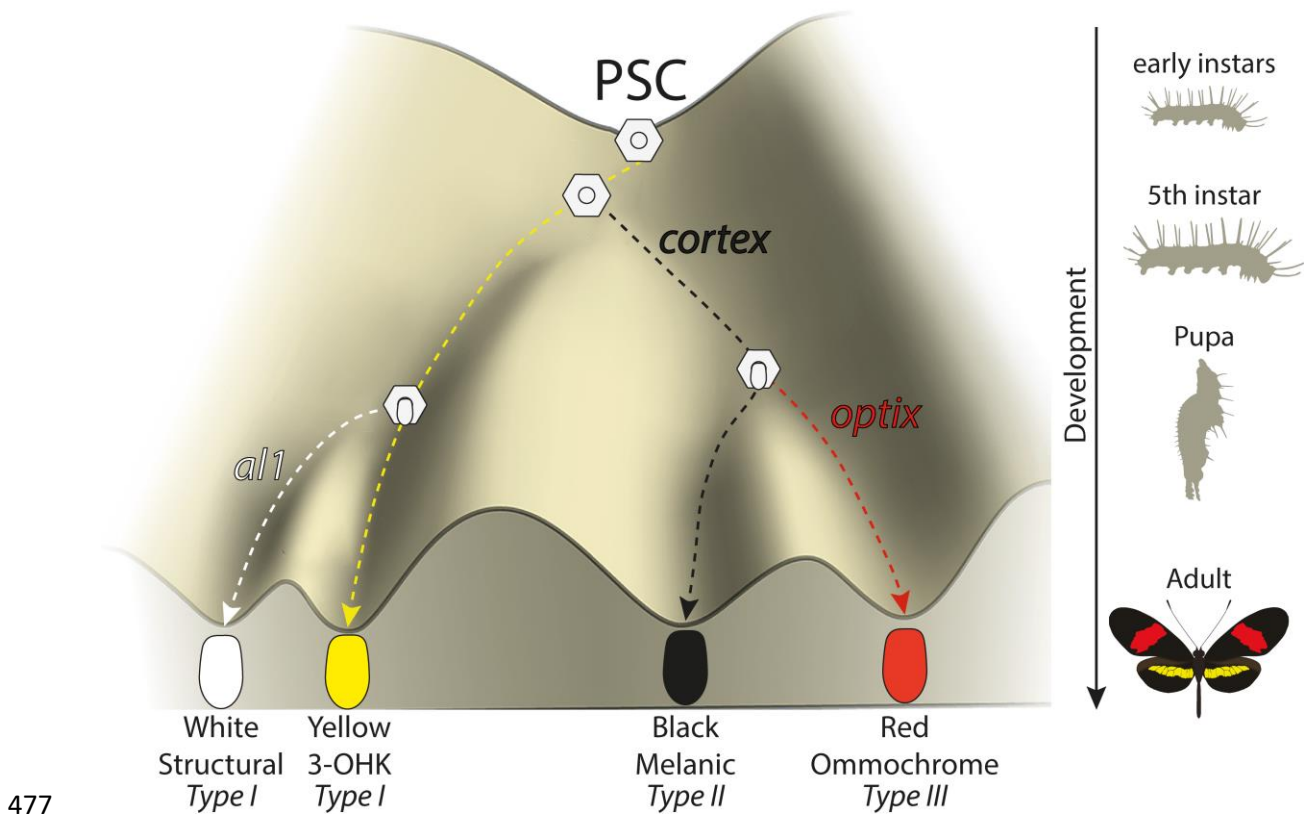

**Figure 10 – Expression of key genes affect scale fate decisions and influence downstream pigmentation state**

During early instar development, wing disc cells differentiate into presumptive scale cells (PSCs). Throughout 5<sup>th</sup> instar growth, PSCs express key scale cell specification genes such as *cortex*, which induce differentiation into Type II (*optix* -) scales or Type III (*optix* +) scales. In the absence of *cortex*, scale cells differentiate into Type I scales which differ in pigmentation state based on 3-OHK synthesis controlled by *aristalless1* expression. Model based on the epigenetic landscape (Waddington) and by observations made by Gilbert (1987).

478 However, the switch induced by Cortex under this model is likely not a simple binary toggle, and is  
479 perhaps dependent on a given protein threshold or heterochrony in expression rather than  
480 presence/absence, as we find that Cortex protein also localises to the presumptive yellow bar in  
481 developing pupal wings. Moreover, the *RNA-seq* data presented suggests other linked genes may also  
482 be playing a role in controlling pattern switches between *Heliconius* morphs. In particular, we report  
483 the presence of a bi-cistronic transcript containing the ORFs of the genes *dome* and *wash*, which are  
484 differentially expressed during early pupal wing development. While a precise role for *dome/wash* in  
485 wing patterning remains to be demonstrated, it raises the possibility that multiple linked genes co-  
486 operate during *Heliconius* wing development to drive pattern diversity. It is noteworthy that in the  
487 locally polymorphic *H. numata*, all wing pattern variation is controlled by inversions surrounding *cortex*

488 and *dome/wash*, both of which are also differentially expressed in *H. numata* (Saenko et al., 2019). This  
489 raises the interesting possibility that evolution has favoured the interaction of multiple genes at the locus  
490 that have since become locked into a supergene in *H. numata*.

#### 491 **Conclusions:**

492 The utilization of ‘hotspots’ in evolution has become a recurring theme of evolutionary biology, with  
493 several examples in which independent mutations surrounding the same gene have driven adaptive  
494 evolution (e.g *Pitx1*, *Scute*) (Stern and Orgogozo, 2009). One proposed facilitator of such hotspots is  
495 through the action of genes acting as “input-output” modules, whereby complex spatio-temporal  
496 information is translated into a co-ordinated cell differentiation program, in a simple switch like manner.  
497 One prediction of the nature of such genes would be a switch-like behaviour such as that observed for  
498 *cortex* in this study, as well as the presence of a complex modular *cis*-regulatory architecture  
499 surrounding the gene that is able to integrate the complex upstream positional information into the  
500 switch-like output. A conserved feature of the *cortex* locus in Lepidoptera is the presence of large  
501 intergenic regions surrounding the gene, with evidence these may be acting as modular *cis*-regulatory  
502 switches in *Heliconius* (Enciso-Romero et al., 2017; Van Belleghem et al., 2017), fitting the predicted  
503 structure of input-output genes. Unlike canonical input-output loci however, *cortex* expression appears  
504 not to be restricted to any particular colour pattern element in any given species/morph, and yet is  
505 capable of producing a switch-like output (Type I vs Type II/III scales).

506 The genetic locus containing the gene *cortex* has now been implicated in driving wing patterning  
507 differences in many divergent Lepidoptera, and represents one of the more striking cases of convergent  
508 evolution to date. We have shown that it is spatially regulated during larval development, and yet shows  
509 wing-wide cell fate phenotypes leading to a switch in scale cell fate. Furthermore, our work shows that  
510 two independent CREs in *H. melpomene* and *H. erato* evolved to control the presence/absence of a  
511 yellow hindwing bar. The amenability of *cortex* to evolutionary change suggests it may be occupying  
512 an unusual position in the GRN underlying scale cell identity, and may be acting as an input/output  
513 gene (Stern and Orgogozo, 2009) that integrates upstream positional information into a simple on-off  
514 switch for scale differentiation. However, it is still unclear how *cortex* mechanistically affects  
515 pigmentation differences, and given its widespread usage throughout Lepidoptera, it is of general  
516 interest to understand its role in driving scale pigmentation.

517

## 518 **Materials and Methods**

### 519 **Butterfly husbandry**

520 *Heliconius* butterflies were collected in the tropical forests of Panama and Ecuador. Adults were  
521 provided with an artificial diet of pollen/glucose solution supplemented with flowers of *Psiguria*,  
522 *Lantana* and/or *Psychotria alata* according to availability. Females were provided with Passiflora plants  
523 for egg laying (*P. menispermifolia* for *H. melpomene*, *P. biflora* for *H. erato* and *H. charithonia*, and  
524 *P. vitifolia* for *H. hecale*). Eggs were collected daily, and caterpillars reared on fresh shoots of *P.*  
525 *williamsi* (*melpomene*), *P. biflora* (*erato* and *charithonia*) and *P. vitifolia* for *H. hecale*. Late 5th (final)  
526 instar, caterpillars were separated into individual pots in a temperature-monitored room for *RNA-seq*  
527 experiments, where they were closely observed for the purpose of accurate developmental staging.

### 528 **Phylogenetic analysis of *domeless* and *cortex***

529 To identify orthologs of *dome* across the Lepidoptera we performed tBLASTn searches using the  
530 previously annotated *H. melpomene* Hmel2 (Hm) and *H. erato demophoon* V1 (Hed) *dome* sequences  
531 against the genomes of *Operophtera brumata* V1 (Ob), *Trichoplusia ni* Hi5.VO2 (Tn), *Bombyx mori*  
532 ASM15162v1 (Bm), *Manduca sexta* 1.0 (Ms), *Plodia interpunctella* V1 (Pi), *Amyeolis transitella* V1  
533 (At), *Phoebis sennae* V1.1 (Ps), *Bicyclus anynana* V1.2 (Ba), *Danaus plexippus* V3 (Dp), *Dryas iulia*  
534 helico3 (Di), *Agraulis vanillae* helico3 (Av), *Heliconius erato lativitta* V1 (Hel) genomes found on  
535 Lepbase (Challis et al., 2016). As a trichopteran outgroup we used a recently published Pacbio assembly  
536 of *Stenopsyche tienmushanensis* (St) (Luo et al., 2018). Recovered amino acid translations were aligned  
537 using clustal omega (F. et al., 2019). The resulting alignments were used to produce a phylogenetic tree  
538 using PhyML (Guindon et al., 2010), based on a best fit model using AIC criterion (selected model was  
539 JTT + G + I + F). The tree was visualised and re-rooted to the Trichopteran outgroup using FigTree.

540 To confirm *cortex* as a *cdc20* gene, we retrieved full-length protein homologs from TBLASTN searches  
541 and used them to generate a curated alignment with MAFFT/Guidance2 with a column threshold of 0.5.  
542 We then constructed a maximum-likelihood tree using W-IQ-TREE with the “Auto” function to find a  
543 best-fit model of substitution.

### 544 **Tissue sampling and *RNA-seq***

545 *H. melpomene rosina* and *H. erato demophoon* butterflies were collected around Gamboa, Panama; *H.*  
546 *melpomene melpomene* and *H. erato hydara* butterflies were collected around Puerto Lara, Darien,  
547 Panama. Methodology for sample preparation and sequencing was performed as previously  
548 described (Hanly et al., 2019). The datasets generated and/or analysed during the current study are  
549 available in the SRA repository (PRJNA552081). Reads from each species were aligned to the  
550 respective genome assemblies Hmel2 (Davey et al., 2016) and Herato\_demophoon\_v1 (Van Belleghem  
551 et al., 2017), using Hisat2 with default parameters (Kim et al., 2019). The genomes and annotations

552 used are publicly available at [www.lepbase.org](http://www.lepbase.org). Reads were counted with HTSeq-count in union  
553 mode (Anders et al., 2015) and statistical analysis performed with the R package DESeq2 (Love et al.,  
554 2014). Comparisons for larvae were for whole hindwings, grouping samples by pattern form. Samples  
555 for pupal stages included wings that were dissected into anterior and posterior compartment as in Hanly  
556 et al (2019), and were analysed in DESeq2 using the GLM;

557  $\sim$  individual + compartment\*morph

558 (Compartments: Anterior Hindwing (HA), Posterior Hindwing (HPo)). *H. melpomene* and *H.*  
559 *erato* were analysed separately; homology between genes was determined by reciprocal BLAST. The  
560 fold-changes and adjusted P-values given in figure 2 reflect the primary contrast, showing the effect of  
561 pattern form given the effect of compartment. Read counts were determined for whole hindwings at all  
562 stages.

### 563 **RT-qPCR**

564 The expression level of *cortex* in larval hindwings was further analysed by qPCR in *H. e. demophoon*  
565 and *H. e. hydara*. Three individuals were used for each morph. Each individual was an independent  
566 replicate (i.e. no pooling of samples). RNA was extracted from the hindwing tissue of larva using Trizol  
567 followed by DNase-treatment. An mRNA enrichment was performed using the Dynabeads mRNA  
568 purification kit (Thermo Fisher). The mRNA was then converted to cDNA by reverse transcription  
569 using the iScript cDNA synthesis kit (Bio-Rad). All reactions had a final cDNA concentration of 2ng  
570  $\mu\text{l}^{-1}$  and a primer concentration of 400nM. The RT-qPCR was carried out using Brilliant III Ultra-fast  
571 SYBR green qPCR master mix (Agilent Technologies), on a AriaMx Real-time PCR system (Agilent  
572 Technologies) according to manufacturer's instructions. The PCR programme consisted of 95°C for 2  
573 min followed by 40 cycles of 95°C for 5 seconds, 58°C for 30 seconds and 70°C for 30 seconds. qPCR  
574 experiments were performed using three biological replicates, three technical replicates and a no  
575 template control. Expression levels were normalised using the geometric mean of three housekeeping  
576 genes, *eFla*, *rpL3* and *polyABP* that have previously been validated for *Heliconius numata* (Piron  
577 Prunier et al., 2016). The relative expression levels were analysed using the  $R = 2^{-\Delta\Delta\text{Ct}}$  method (Livak  
578 and Schmittgen, 2001). Primer specificity was confirmed using melting curve analysis and the PCR  
579 products were checked on a 2% (w/v) agarose gel. The primer efficiency of each gene was calculated  
580 using the standard curve given by a 10-fold serial dilution of cDNA (1,  $10^{-1}$ ,  $10^{-2}$ ,  $10^{-3}$ ,  $10^{-4}$ ) and  
581 regression coefficient ( $R^2$ ) values.

### 582 ***In situ* hybridizations**

583 Fifth instar larval wing disks and whole mount *in situ* hybridizations were performed following a  
584 published procedure (Martin and Reed, 2014) and imaged using a Leica S4E microscope (Leica  
585 Microsystems). Riboprobe synthesis was performed using the following primers from a 5<sup>th</sup> instar wing

586 disc cDNA library extracted from *H. melpomene*:

587 Forward primer 5' – CCCGAGATTCTTTCAGCGAAAC -3' and Reverse primer 5' –  
588 ACCGCTCCAACACCAAGAAG – 3'. Templates for riboprobes were designed by attaching a T7  
589 promoter through PCR and performing a DIG labelled transcription reaction (Roche). The same *H.*  
590 *melpomene* probe was used in all in situ hybridisation experiments. The resulting probe spanned from  
591 Exon 2 to Exon 7 and was 841bp long.

## 592 **Immunohistochemistry and image analysis**

593 Pupal wings were dissected around 60 to 70 h post pupation in PBS and fixed at room temperature with  
594 fix buffer (400 µl 4% paraformaldehyde, 600 µl PBS 2mM EGTA) for 30 min. Subsequent washes  
595 were done in wash buffer (0.1% Triton-X 100 in PBS) before blocking the wings at 4°C in block buffer  
596 (0.05 g Bovine Serum Albumin, 10 ml PBS 0.1% Triton-X 100). Wings were then incubated in primary  
597 antibodies against Cortex (1:200, monoclonal rabbit anti-Cortex) at 4°C overnight, washed and added  
598 in secondary antibody (1:500, donkey anti-rabbit IgG, AlexaFlour 555, ThermoFisher Scientific A-  
599 31572). Before mounting, wings were incubated in DAPI with 50% glycerol overnight and finally  
600 transferred to mounting medium (60% glycerol/ 40% PBS 2mM EGTA) for imaging. Z-stacked 2-  
601 channelled confocal images were acquired using a Zeiss Cell Observer Spinning Disk Confocal  
602 microscope.

## 603 **CRISPR/Cas9 genome editing**

604 Guide RNAs were designed corresponding to GGN<sub>20</sub>NGG sites located within the *cortex* coding region  
605 and across putative CREs using the program Geneious (Kearse et al., 2012). To increase target  
606 specificity, guides were checked against an alignment of both *H. melpomene* and *H. erato* re-sequence  
607 data at the scaffolds containing the *cortex* gene (Moest et al., 2020; Van Belleghem et al., 2017), and  
608 selected based on sequence conservation across populations. Based on these criteria, each individual  
609 guide was checked against the corresponding genome for off-target effects, using the default Geneious  
610 algorithm. Guide RNAs with high conservation and low off-target scores were then synthesised  
611 following the protocol by Bassett and Liu, (2014). Injections were performed following procedures  
612 described in Mazo-Vargas et al., (2017), within 1-4 hours of egg laying. Several combinations of guide  
613 RNAs for separate exons at different concentrations were used for different injection experiments  
614 (Supplementary File 7). For *H. charithonia* we used the *H. erato* specific guides and for *H. hecale* we  
615 used the *H. melpomene* guides.

## 616 **Genotyping**

617 DNA was extracted from mutant leg tissue and amplified using oligonucleotides flanking the sgRNAs  
618 target region (Supplementary File 6). PCR amplicons were column purified, subcloned into the pGEM-  
619 T Easy Vector System (Promega) and sequenced on an ABI 3730 sequencer.

620

621 *ATAC-seq*

622 *H. melpomene rosina* and *H. erato demophoon* butterflies were collected around Gamboa, Panama; *H.*  
623 *melpomene melpomene* and *H. erato hydara* butterflies were collected around Puerto Lara, Darien,  
624 Panama. Caterpillars of each species were reared on their respective host plants and allowed to grow  
625 until the wandering stage at 5<sup>th</sup> instar. Live larvae were placed on ice for 1-2 minutes and then pinned  
626 and dissected in 1X ice cold PBS. The colour of the imaginal discs, as well as the length of the lacunae,  
627 gradually change throughout the larva's final day of development, so that they can be used to confirm  
628 the staging inferred from pre-dissection cues (Reed et al., 2007). All larvae used for this project were  
629 stage 3.5 or older. *ATAC-seq* protocol was based on previously described methodology (Lewis and  
630 Reed, 2019) and edited as follows. The imaginal discs were removed and suspended whole in 350µl of  
631 sucrose solution (250mM D-sucrose, 10mM Tris-HCl, 1mM. MgCl<sub>2</sub>, 1x protease inhibitors (Roche))  
632 inside labelled 2ml dounce homogenisers (Sigma-Aldrich) for nuclear extraction. Imaginal discs  
633 corresponding to the left and right hindwings were pooled. After homogenising the tissue on ice, the  
634 resulting cloudy solution was centrifuged at 1000 rcf for 7 minutes at 4°C. The pellet was then  
635 resuspended in 150µl of cold lysis buffer (10mM Tris-HCl, 10mM NaCl, 3mM MgCl<sub>2</sub>, 0.1% IGEPAL  
636 CA-630 (SigmaAldrich), 1x protease inhibitors) to burst the cell membranes and release nuclei into the  
637 solution. Samples were then checked under a microscope with a counting chamber following each  
638 nuclear extraction, to confirm nuclei dissociation and state and to assess the concentration of nuclei in  
639 the sample. Finally based on these observations a calculation to assess number of nuclei, and therefore  
640 DNA, to be exposed to the transposase was performed. This number was fixed on 400,000 nuclei, which  
641 is the number of nuclei with ~0.4Gb genomes (*H. erato* genome size) required to obtain the amount of  
642 DNA for which *ATAC-seq* is optimised (Buenrostro et al., 2013). For *H. melpomene* this number was  
643 500,333, since the genome size of *H. melpomene* is 0.275Gb. (Buenrostro et al., 2013). For *H.*  
644 *melpomene* this number was 500,333, where the genome size of *H.melpomene* is 0.275Gb. For quality  
645 control, a 15µl aliquot of nuclear suspension was stained with trypan blue, placed on a hemocytometer  
646 and imaged at 64x. After confirmation of adequate nuclear quality and assessment of nuclear  
647 concentration, a subsample of the volume corresponding to 400,000 nuclei (*H. erato*) and 500,333 (*H.*  
648 *melpomene*) was aliquoted, pelleted 1000 rcf for 7 minutes at 4°C and immediately resuspended in a  
649 transposition mix, containing Tn5 in a transposition buffer. The transposition reaction was incubated at  
650 37°C for exactly 30 minutes. A PCR Minelute Purification Kit (Qiagen) was used to interrupt the  
651 tagmentation and purify the resulting tagged fragments, which were amplified using custom-made  
652 Nextera primers and a NEBNext High-fidelity 2x PCR Master Mix (New England Labs). Library  
653 amplification was completed between the STRI laboratory facilities in Naos (Panama) and Cambridge  
654 (UK). The amplified libraries were sequenced as 37bp paired-end fragments with NextSeq 500 Illumina  
655 technology at the Sequencing and Genomics Facility of the University of Puerto Rico.

656

### 657 **Topology Weighting by Iterative Sampling of Subtrees (Twisst) Analysis**

658 We applied the phylogenetic weighting strategy Twisst (topology weighting by iterative sampling of  
659 subtrees; Martin and Belleghem 2017) to identify shared or conserved genomic intervals between sets  
660 of *Heliconius melpomene* and *Heliconius cydno* populations with similar phenotypes around the *cortex*  
661 gene locus on chromosome 15. Given a tree and a set of pre-defined groups Twisst determines a  
662 weighting for each possible topology describing the relationship of groups or phylogenetic hypothesis.  
663 Similar to (Enciso-Romero et al. 2017) we evaluated the support for two alternative phylogenetic  
664 hypotheses using genomic data obtained from (Moest et al. 2020). Hypothesis one tested for monophyly  
665 of samples that have a dorsal yellow hindwing bar. This comparison included the geographic colour  
666 patterns morphs with a dorsal hindwing bar *H. m. rosina*, *H. c. weymeri weymeri*, *H. c. weymeri gustavi*  
667 and *H. pachinus* versus the all-black dorsal hindwing morphs *H. m. vulcanus*, *H. m. melpomene* (French  
668 Guiana), *H. m. cythera*, *H. c. chioneus* and *H. c. zelinde*. Hypothesis two tested for monophyly of  
669 samples that have a ventral yellow hindwing bar versus an all-black ventral hindwing. This comparison  
670 included the geographic colour patterns morphs with a ventral hindwing bar *H. m. rosina*, *H. m.*  
671 *vulcanus*, *H. m. cythera*, *H. c. weymeri weymeri*, *H. c. weymeri gustavi* and *H. pachinus* versus the all-  
672 black ventral hindwing morphs *H. m. melpomene* (French Guiana), *H. c. chioneus* and *H. c. zelinde*.  
673 Maximum likelihood trees were built from sliding windows of 50 SNPs with a step size of 20 SNPs  
674 using PhyML v3.0 (Guindon et al. 2010) and tools available at <https://github.com/simonhmartin/twisst>.  
675 Only windows were considered that had at least 10 sites for which each population had at least 50% of  
676 its samples genotyped. Twisst was run with a fixed number of 1000 subsampling iterations.

### 677 **Hi-C and virtual 4C plots**

678 Analysis of chromatin contacts between distal cis-regulatory loci and the *cortex* promoter region was  
679 performed as previously described (Lewis et al. 2019 PNAS, Lewis et al. 2020). In brief, Hi-C data  
680 produced from day 3 pupal *H. e. lativitta* wings was used to generate an empirical expected distribution  
681 and read counts for Hi-C contacts between 5kb windows centred on the distal CRE and *cortex* promoter  
682 were used to determine the observed contacts between loci. Fisher's exact test was then performed to  
683 determine significance of the observed contacts relative to those expected from the background model.  
684 Virtual Hi-C signal plots were generated using a custom python script (Ray et al. 2019).

### 685 **Coverage depth analysis and TE genotyping**

686 High-depth whole-genome sequences of 16 *H. melpomene*, *H. timareta*, and *H. erato* subspecies were  
687 obtained from the European Nucleotide Archive, accession numbers can be found in Supplementary  
688 File 14 – Table S14. To assess structural variation putatively affecting the yellow phenotype, reads were  
689 mapped to the reference genomes of subspecies that lacked the yellow bar stored in the genome browser



690 Lepbase, “hmel2.5” for *H. melpomene* and *H. timareta*, and “*Heliconius\_erato\_lativitta\_v1*” for *H.*  
691 *erato* (Challis et al., 2016) with BWA mem (Li et al., 2009). Median sequencing depths across the  
692 scaffold containing cortex were computed for all individuals (n=79) in 50bp sliding windows and a  
693 mapping quality threshold of 30 with the package Mosdepth (Perdersen and Quinlan, 2018). Window  
694 median depths were normalised by dividing them by the mean depth for the full scaffold per individual.  
695 We then averaged the normalised median depths of all individuals per subspecies, to visualise  
696 deviations from the mean sequencing depth across the region in geographically widespread subspecies  
697 with and without the yellow bar. We then genotyped across the putative *H. melpomene* deletion using  
698 the primers employed for CRISPR genotyping (see Supplementary File 8). The products were then  
699 cloned into the pGEM-T Easy Vector System (Promega) and sequenced them on an ABI 3730 sequencer  
700 from both directions using T7 forward and M13 reverse primers. Sequencing was performed from three  
701 separate colonies, and a consensus sequence was created based on an alignment of the three replicates  
702 from populations of *H. m. melpomene* and *H. m. rosina*.

### 703 **Scanning Electron Microscopy (SEM) Imaging**

704 Individual scales from wild type and mutant regions of interest were collected by brushing the surface  
705 of the wing with an eyelash tool, then dusted onto an SEM stub with double-sided carbon tape. Stubs  
706 were then colour imaged under the Keyence VHX-5000 microscope for registration of scale type.  
707 Samples were sputter-coated with one 12.5 nm layer of gold for improving sample conductivity. SEM  
708 images were acquired on a FEI Teneo LV SEM, using secondary electrons (SE) and an Everhart-  
709 Thornley detector (ETD) using a beam energy of 2.00 kV, beam current of 25 pA, and a 10  $\mu$ s dwell  
710 time. Individual images were stitched using the Maps 3.10 software (ThermoFisher Scientific).

### 711 **Morphometrics analysis**

712 Morphometric measurements of scale widths and ridge distances were carried out on between 10 and  
713 20 scales of each type, using a custom semi-automated R pipeline that derives ultrastructural  
714 parameters from large SEM images (Day et al., 2019). Briefly, ridge spacing was assessed by Fourier  
715 transforming intensity traces of the ridges acquired from the FIJI software (Schindelin et al.,  
716 2012). Scale width was directly measured in FIJI by manually tracing a line, orthogonal to the ridges,  
717 at the section of maximal width.

### 718 **Acknowledgements**

719 We thank Oscar Paneso, Elizabeth Evans, Rachel Crisp and Cruz Batista, for technical support with  
720 rearing of butterflies and CRISPR larvae, and to Markus Möest, and Tim Thurman for assistance with  
721 butterfly collection. We are also grateful to Krzysztof “Chris” Kozak and Chi Yun for thoughtful  
722 discussions and feedback on the manuscript. We thank the GW Nanofabrication and Imaging Center

723 for enabling SEM, and in particular Christine Brantner and Anastas Popratiloff for their technical  
724 assistance.

## 725 **Competing interests**

726 The authors declare no competing interests.

## 727 **Data availability**

728 The ATAC-Seq sequencing reads reported in this paper have been deposited under ENA BioProject  
729 (accession number PRJEB43672).

## 730 **Author Contributions**

731 C.D.J., L.L., J.J.H., A.M., and W.O.M. designed the research; L.L., J.J.H., L.S.L., A.R.,  
732 E.S.M.H., S.M.B, J.L., Z.G., I.A.W., C.C., C.W., J.M.W., J.F., L.H.L., G.M.K., H.A.C., L.R.B.  
733 R.P., M.P. performed research. L.L wrote the paper. C.D.J and W.O.M contributed equally.

## 734 **Funding**

735 This work was funded by a grant from the BBSRC to C.J and supported L.L, I.A.W., C.W., J.M.W.,  
736 (BB/R007500/1); the National Science Foundation awards IOS-1656553 and IOS-1755329 to A.M and  
737 supported J.J.H., L.S.L., A.R.; a Wellcome Trust PhD studentship awarded to JJH, a Smithsonian  
738 Institution grant to WOM and supported C.C., J.F., H.A.C., L.R.B.

## 739 **References**

- 740 Aymone ACB, Valente VLS, de Araújo AM. 2013. Ultrastructure and morphogenesis of the wing  
741 scales in *Heliconius erato phyllis* (Lepidoptera: Nymphalidae): What silvery/brownish  
742 surfaces can tell us about the development of color patterning? *Arthropod Structure &*  
743 *Development* **42**:349–359. doi:10.1016/j.asd.2013.06.001
- 744 Beldade P, Saenko SV, Pul N, Long AD. 2009. A Gene-Based Linkage Map for *Bicyclus anynana*  
745 Butterflies Allows for a Comprehensive Analysis of Synteny with the Lepidopteran Reference  
746 Genome. *PLOS Genetics* **5**:e1000366. doi:10.1371/journal.pgen.1000366
- 747 Brien MN, Enciso-Romero J, Parnell AJ, Salazar PA, Morochz C, Chalá D, Bainbridge HE, Zinn T, Curran  
748 EV, Nadeau NJ. 2019. Phenotypic variation in *Heliconius erato* crosses shows that iridescent  
749 structural colour is sex-linked and controlled by multiple genes. *Interface Focus* **9**:20180047.  
750 doi:10.1098/rsfs.2018.0047
- 751 Brown KS. 1981. The Biology of *Heliconius* and Related Genera. *Annual Review of Entomology*  
752 **26**:427–457. doi:10.1146/annurev.en.26.010181.002235
- 753 Burg KRL van der, Lewis JJ, Brack BJ, Fandino RA, Mazo-Vargas A, Reed RD. 2020. Genomic  
754 architecture of a genetically assimilated seasonal color pattern. *Science* **370**:721–725.  
755 doi:10.1126/science.aaz3017
- 756 Challi RJ, Kumar S, Dasmahapatra KK, Jiggins CD, Blaxter M. 2016. Lepbase: the Lepidopteran  
757 genome database. *bioRxiv* 056994. doi:10.1101/056994

- 758 Chan YF, Marks ME, Jones FC, Villarreal G, Shapiro MD, Brady SD, Southwick AM, Absher DM,  
759 Grimwood J, Schmutz J, Myers RM, Petrov D, Jónsson B, Schluter D, Bell MA, Kingsley DM.  
760 2010. Adaptive Evolution of Pelvic Reduction in Sticklebacks by Recurrent Deletion of a Pitx1  
761 Enhancer. *Science* **327**:302–305. doi:10.1126/science.1182213
- 762 Cho EH, Nijhout HF. 2013. Development of polyploidy of scale-building cells in the wings of *Manduca*  
763 *sexta*. *Arthropod Struct Dev* **42**:37–46. doi:10.1016/j.asd.2012.09.003
- 764 Chu T, Henrion G, Haegeli V, Strickland S. 2001. Cortex, a *Drosophila* gene required to complete  
765 oocyte meiosis, is a member of the Cdc20/fizzy protein family. *Genesis* **29**:141–152.  
766 doi:10.1002/gene.1017
- 767 Concha C, Wallbank RWR, Hanly JJ, Fenner J, Livraghi L, Rivera ES, Paulo DF, Arias C, Vargas M,  
768 Sanjeev M, Morrison C, Tian D, Aguirre P, Ferrara S, Foley J, Pardo-Diaz C, Salazar C, Linares  
769 M, Massardo D, Counterman BA, Scott MJ, Jiggins CD, Papa R, Martin A, McMillan WO. 2019.  
770 Interplay between Developmental Flexibility and Determinism in the Evolution of Mimetic  
771 Heliconius Wing Patterns. *Current Biology* S0960982219313168.  
772 doi:10.1016/j.cub.2019.10.010
- 773 Courtier-Orgogozo V, Arnoult L, Prigent SR, Wiltgen S, Martin A. 2020. Gephebase, a database of  
774 genotype–phenotype relationships for natural and domesticated variation in Eukaryotes.  
775 *Nucleic Acids Res* **48**:D696–D703. doi:10.1093/nar/gkz796
- 776 Darragh K, Byers KJRP, Merrill RM, McMillan WO, Schulz S, Jiggins CD. 2019. Male pheromone  
777 composition depends on larval but not adult diet in *Heliconius melpomene*. *Ecological*  
778 *Entomology* **44**:397–405. doi:https://doi.org/10.1111/een.12716
- 779 Dasmahapatra KK, Walters JR, Briscoe AD, Davey JW, Whibley A, Nadeau NJ, Zimin AV, Hughes DST,  
780 Ferguson LC, Martin SH, Salazar C, Lewis JJ, Adler S, Ahn S-J, Baker DA, Baxter SW,  
781 Chamberlain NL, Chauhan R, Counterman BA, Dalmay T, Gilbert LE, Gordon K, Heckel DG,  
782 Hines HM, Hoff KJ, Holland PWH, Jacquín-Joly E, Jiggins FM, Jones RT, Kapan DD, Kersey P,  
783 Lamas G, Lawson D, Mapleson D, Maroja LS, Martin A, Moxon S, Palmer WJ, Papa R,  
784 Papanicolaou A, Pauchet Y, Ray DA, Rosser N, Salzberg SL, Supple MA, SurrIDGE A, Tenger-  
785 Trolander A, Vogel H, Wilkinson PA, Wilson D, Yorke JA, Yuan F, Balmuth AL, Eland C, Gharbi  
786 K, Thomson M, Gibbs RA, Han Y, Jayaseelan JC, Kovar C, Mathew T, Muzny DM, Ongerí F, Pu  
787 L-L, Qu J, Thornton RL, Worley KC, Wu Y-Q, Linares M, Blaxter ML, French-Constant RH,  
788 Joron M, Kronforst MR, Mullen SP, Reed RD, Scherer SE, Richards S, Mallet J, Owen McMillan  
789 W, Jiggins CD, The Heliconius Genome Consortium. 2012. Butterfly genome reveals  
790 promiscuous exchange of mimicry adaptations among species. *Nature* **487**:94–98.  
791 doi:10.1038/nature11041
- 792 Day CR, Hanly JJ, Ren A, Martin A. 2019. Sub-micrometer insights into the cytoskeletal dynamics and  
793 ultrastructural diversity of butterfly wing scales. *Dev Dyn* **248**:657–670. doi:10.1002/dvdy.63
- 794 Enciso-Romero J, Pardo-Díaz C, Martin SH, Arias CF, Linares M, McMillan WO, Jiggins CD, Salazar C.  
795 2017. Evolution of novel mimicry rings facilitated by adaptive introgression in tropical  
796 butterflies. *Molecular Ecology* **26**:5160–5172. doi:10.1111/mec.14277
- 797 F M, Ym P, J L, N B, T G, N M, P B, Arn T, Sc P, Rd F, R L. 2019. The EMBL-EBI search and sequence  
798 analysis tools APIs in 2019. *Nucleic Acids Res* **47**:W636–W641. doi:10.1093/nar/gkz268
- 799 Finkbeiner SD, Fishman DA, Osorio D, Briscoe AD. 2017. Ultraviolet and yellow reflectance but not  
800 fluorescence is important for visual discrimination of conspecifics by *Heliconius erato*.  
801 *Journal of Experimental Biology* **220**:1267–1276. doi:10.1242/jeb.153593
- 802 Gilbert LE, Forrest HS, Schultz TD, Harvey DJ. 1987. Correlations of ultrastructure and pigmentation  
803 suggest how genes control development of wing scales of *Heliconius* butterflies. *The Journal*  
804 *of research on the Lepidoptera (USA)*.
- 805 Guindon S, Dufayard J-F, Lefort V, Anisimova M, Hordijk W, Gascuel O. 2010. New Algorithms and  
806 Methods to Estimate Maximum-Likelihood Phylogenies: Assessing the Performance of  
807 PhyML 3.0. *Systematic Biology* **59**:307–321. doi:10.1093/sysbio/syq010

- 808 Huber B, Whibley A, Poul YL, Navarro N, Martin A, Baxter S, Shah A, Gilles B, Wirth T, McMillan WO,  
809 Joron M. 2015. Conservatism and novelty in the genetic architecture of adaptation in  
810 *Heliconius* butterflies. *Heredity* **114**:515–524. doi:10.1038/hdy.2015.22
- 811 Ito K, Katsuma S, Kuwazaki S, Jouraku A, Fujimoto T, Sahara K, Yasukochi Y, Yamamoto K, Tabunoki H,  
812 Yokoyama T, Kadono-Okuda K, Shimada T. 2016. Mapping and recombination analysis of two  
813 moth colour mutations, Black moth and Wild wing spot, in the silkworm *Bombyx mori*.  
814 *Heredity* **116**:52–59. doi:10.1038/hdy.2015.69
- 815 Iwata M, Otaki JM. 2016. Spatial patterns of correlated scale size and scale color in relation to color  
816 pattern elements in butterfly wings. *Journal of Insect Physiology* **85**:32–45.  
817 doi:10.1016/j.jinsphys.2015.11.013
- 818 Janssen JM, Monteiro A, Brakefield PM. 2001. Correlations between scale structure and  
819 pigmentation in butterfly wings. *Evolution & Development* **3**:415–423.  
820 doi:<https://doi.org/10.1046/j.1525-142X.2001.01046.x>
- 821 Jiggins CD. 2017. *The Ecology and Evolution of Heliconius Butterflies*. Oxford University Press.
- 822 Jiggins CD, McMillan WO. 1997. The genetic basis of an adaptive radiation: warning colour in two  
823 *Heliconius* species. *Proc Biol Sci* **264**:1167–1175. doi:10.1098/rspb.1997.0161
- 824 Joron M, Papa R, Beltrán M, Chamberlain N, Mavárez J, Baxter S, Abanto M, Bermingham E,  
825 Humphray SJ, Rogers J, Beasley H, Barlow K, ffrench-Constant R, Mallet J, McMillan WO,  
826 Jiggins CD. 2006. A Conserved Supergene Locus Controls Colour Pattern Diversity in  
827 *Heliconius* Butterflies. *PLoS Biol* **4**:e303. doi:10.1371/journal.pbio.0040303
- 828 Kearse M, Moir R, Wilson A, Stones-Havas S, Cheung M, Sturrock S, Buxton S, Cooper A, Markowitz S,  
829 Duran C, Thierer T, Ashton B, Meintjes P, Drummond A. 2012. Geneious Basic: an integrated  
830 and extendable desktop software platform for the organization and analysis of sequence  
831 data. *Bioinformatics* **28**:1647–1649. doi:10.1093/bioinformatics/bts199
- 832 Kempainen P, Li Z, Rastas P, Löytynoja A, Fang B, Yang J, Guo B, Shikano T, Merilä J. n.d. Genetic  
833 population structure constrains local adaptation in sticklebacks. *Molecular Ecology* **n/a**.  
834 doi:<https://doi.org/10.1111/mec.15808>
- 835 Koch PB. 1993. Production of [14C]-Labeled 3-Hydroxy-L-Kynurenine in a Butterfly, *Heliconius*  
836 *charitonia* L. (Heliconidae), and Precursor Studies in Butterfly Wing Ommatins. *Pigment Cell*  
837 *Research* **6**:85–90. doi:10.1111/j.1600-0749.1993.tb00586.x
- 838 Kozak KM, McMillan WO, Joron M, Jiggins CD. 2018. Genome-wide admixture is common across the  
839 *Heliconius* radiation. *bioRxiv* 414201. doi:10.1101/414201
- 840 Kronforst MR, Papa R. 2015. The Functional Basis of Wing Patterning in *Heliconius* Butterflies: The  
841 Molecules Behind Mimicry. *Genetics* **200**:1–19. doi:10.1534/genetics.114.172387
- 842 Lamas G, editor. 2004. *Atlas Of Neotropical Lepidoptera: Checklist Pt. 4a Hesperioidea-papilionoidea*.  
843 Gainesville: Scientific Pub.
- 844 Lewis JJ, Belleghem SMV, Papa R, Danko CG, Reed RD. 2020. Many functionally connected loci foster  
845 adaptive diversification along a neotropical hybrid zone. *Science Advances* **6**:eabb8617.  
846 doi:10.1126/sciadv.abb8617
- 847 Lewis JJ, Geltman RC, Pollak PC, Rondem KE, Belleghem SMV, Hubisz MJ, Munn PR, Zhang L, Benson  
848 C, Mazo-Vargas A, Danko CG, Counterman BA, Papa R, Reed RD. 2019. Parallel evolution of  
849 ancient, pleiotropic enhancers underlies butterfly wing pattern mimicry. *PNAS* **116**:24174–  
850 24183. doi:10.1073/pnas.1907068116
- 851 Lewis JJ, Reed RD. 2019. Genome-Wide Regulatory Adaptation Shapes Population-Level Genomic  
852 Landscapes in *Heliconius*. *Molecular Biology and Evolution* **36**:159–173.  
853 doi:10.1093/molbev/msy209
- 854 Liu Y, Ramos-Womack M, Han C, Reilly P, Brackett KL, Rogers W, Williams TM, Andolfatto P, Stern DL,  
855 Rebeiz M. 2019. Changes throughout a Genetic Network Mask the Contribution of Hox Gene  
856 Evolution. *Curr Biol* **29**:2157–2166.e6. doi:10.1016/j.cub.2019.05.074

- 857 Livak KJ, Schmittgen TD. 2001. Analysis of relative gene expression data using real-time quantitative  
858 PCR and the 2<sup>-</sup>(Delta Delta C(T)) Method. *Methods* **25**:402–408.  
859 doi:10.1006/meth.2001.1262
- 860 Luo S, Tang M, Frandsen PB, Stewart RJ, Zhou X. 2018. The genome of an underwater architect, the  
861 caddisfly *Stenopsyche tienmushanensis* Hwang (Insecta: Trichoptera). *Gigascience* **7**.  
862 doi:10.1093/gigascience/gy143
- 863 Martin A, Courtier-Orgogozo V. 2017. Morphological Evolution Repeatedly Caused by Mutations in  
864 Signaling Ligand Genes In: Sekimura T, Nijhout HF, editors. Diversity and Evolution of  
865 Butterfly Wing Patterns: An Integrative Approach. Singapore: Springer. pp. 59–87.  
866 doi:10.1007/978-981-10-4956-9\_4
- 867 Martin A, Papa R, Nadeau NJ, Hill RI, Counterman BA, Halder G, Jiggins CD, Kronforst MR, Long AD,  
868 McMillan WO, Reed RD. 2012. Diversification of complex butterfly wing patterns by  
869 repeated regulatory evolution of a Wnt ligand. *Proc Natl Acad Sci USA* **109**:12632–12637.  
870 doi:10.1073/pnas.1204800109
- 871 Martin A, Reed RD. 2014. Wnt signaling underlies evolution and development of the butterfly wing  
872 pattern symmetry systems. *Developmental Biology* **395**:367–378.  
873 doi:10.1016/j.ydbio.2014.08.031
- 874 Martin SH, Davey JW, Salazar C, Jiggins CD. 2019. Recombination rate variation shapes barriers to  
875 introgression across butterfly genomes. *PLOS Biology* **17**:e2006288.  
876 doi:10.1371/journal.pbio.2006288
- 877 Massey J, Wittkopp PJ. 2016. The genetic basis of pigmentation differences within and between  
878 *Drosophila* species. *Curr Top Dev Biol* **119**:27–61. doi:10.1016/bs.ctdb.2016.03.004
- 879 Matsuoka Y, Monteiro A. 2018. Melanin Pathway Genes Regulate Color and Morphology of Butterfly  
880 Wing Scales. *Cell Reports* **24**:56–65. doi:10.1016/j.celrep.2018.05.092
- 881 Mazo-Vargas A, Concha C, Livraghi L, Massardo D, Wallbank RWR, Zhang L, Papador JD, Martinez-  
882 Najera D, Jiggins CD, Kronforst MR, Breuker CJ, Reed RD, Patel NH, McMillan WO, Martin A.  
883 2017. Macroevolutionary shifts of WntA function potentiate butterfly wing-pattern diversity.  
884 *PNAS* **114**:10701–10706. doi:10.1073/pnas.1708149114
- 885 McMillan WO, Livraghi L, Concha C, Hanly JJ. 2020. From Patterning Genes to Process: Unraveling  
886 the Gene Regulatory Networks That Pattern Heliconius Wings. doi:10.17863/CAM.55961
- 887 Moest M, Belleghem SMV, James JE, Salazar C, Martin SH, Barker SL, Moreira GRP, Mérot C, Joron M,  
888 Nadeau NJ, Steiner FM, Jiggins CD. 2020. Selective sweeps on novel and introgressed  
889 variation shape mimicry loci in a butterfly adaptive radiation. *PLOS Biology* **18**:e3000597.  
890 doi:10.1371/journal.pbio.3000597
- 891 Moest M, Belleghem SMV, James JE, Salazar C, Martin SH, Barker SL, Moreira GRP, Mérot C, Joron M,  
892 Nadeau NJ, Steiner FM, Jiggins CD. 2019. Classic and introgressed selective sweeps shape  
893 mimicry loci across a butterfly adaptive radiation. *bioRxiv* 685685. doi:10.1101/685685
- 894 Morris J, Navarro N, Rastas P, Rawlins LD, Sammy J, Mallet J, Dasmahapatra KK. 2019. The genetic  
895 architecture of adaptation: convergence and pleiotropy in *Heliconius* wing pattern evolution.  
896 *Heredity* **123**:138–152. doi:10.1038/s41437-018-0180-0
- 897 Murugesan SN, Connahs H, Matsuoka Y, Gupta M das, Huq M, Gowri V, Monroe S, Deem KD, Werner  
898 T, Tomoyasu Y, Monteiro A. 2021. Butterfly eyespots evolved via co-option of the antennal  
899 gene-regulatory network. *bioRxiv* 2021.03.01.429915. doi:10.1101/2021.03.01.429915
- 900 Nadeau NJ. 2016. Genes controlling mimetic colour pattern variation in butterflies. *Current Opinion*  
901 *in Insect Science, Global change biology \* Molecular physiology* **17**:24–31.  
902 doi:10.1016/j.cois.2016.05.013
- 903 Nadeau NJ, Pardo-Diaz C, Whibley A, Supple MA, Saenko SV, Wallbank RWR, Wu GC, Maroja L,  
904 Ferguson L, Hanly JJ, Hines H, Salazar C, Merrill RM, Dowling AJ, ffrench-Constant RH,  
905 Llaurens V, Joron M, McMillan WO, Jiggins CD. 2016. The gene cortex controls mimicry and  
906 crypsis in butterflies and moths. *Nature* **534**:106–110. doi:10.1038/nature17961

- 907 Orteu A, Jiggins CD. 2020. The genomics of coloration provides insights into adaptive evolution.  
908 *Nature Reviews Genetics* **21**:461–475. doi:10.1038/s41576-020-0234-z
- 909 Parnell AJ, Bradford JE, Curran EV, Washington AL, Adams G, Brien MN, Burg SL, Morochz C,  
910 Fairclough JPA, Vukusic P, Martin SJ, Doak S, Nadeau NJ. 2018. Wing scale ultrastructure  
911 underlying convergent and divergent iridescent colours in mimetic *Heliconius* butterflies.  
912 *Journal of The Royal Society Interface* **15**:20170948. doi:10.1098/rsif.2017.0948
- 913 Pesin JA, Orr-Weaver TL. 2007. Developmental Role and Regulation of cortex, a Meiosis-Specific  
914 Anaphase-Promoting Complex/Cyclosome Activator. *PLOS Genetics* **3**:e202.  
915 doi:10.1371/journal.pgen.0030202
- 916 Piron Prunier F, Chouteau M, Whibley A, Joron M, Llaurens V. 2016. Selection of Valid Reference  
917 Genes for Reverse Transcription Quantitative PCR Analysis in *Heliconius numata*  
918 (Lepidoptera: Nymphalidae). *Journal of Insect Science* **16**. doi:10.1093/jisesa/iew034
- 919 Prud'homme B, Gompel N, Carroll SB. 2007. Emerging principles of regulatory evolution. *PNAS*  
920 **104**:8605–8612. doi:10.1073/pnas.0700488104
- 921 Raff JW, Jeffers K, Huang J. 2002. The roles of Fzy/Cdc20 and Fzr/Cdh1 in regulating the destruction  
922 of cyclin B in space and time. *J Cell Biol* **157**:1139–1149. doi:10.1083/jcb.200203035
- 923 Rebeiz M, Patel NH, Hinman VF. 2015. Unraveling the Tangled Skein: The Evolution of Transcriptional  
924 Regulatory Networks in Development. *Annu Rev Genom Hum Genet* **16**:103–131.  
925 doi:10.1146/annurev-genom-091212-153423
- 926 Reed RD, McMillan WO, Nagy LM. 2008. Gene expression underlying adaptive variation in *Heliconius*  
927 wing patterns: non-modular regulation of overlapping cinnabar and vermilion prepatterns.  
928 *Proc Biol Sci* **275**:37–46. doi:10.1098/rspb.2007.1115
- 929 Reed RD, Papa R, Martin A, Hines HM, Counterman BA, Pardo-Diaz C, Jiggins CD, Chamberlain NL,  
930 Kronforst MR, Chen R, Halder G, Nijhout HF, McMillan WO. 2011. optix drives the repeated  
931 convergent evolution of butterfly wing pattern mimicry. *Science* **333**:1137–1141.  
932 doi:10.1126/science.1208227
- 933 Saenko SV, Chouteau M, Piron-Prunier F, Blugeon C, Joron M, Llaurens V. 2019. Unravelling the  
934 genes forming the wing pattern supergene in the polymorphic butterfly *Heliconius numata*.  
935 *Evodevo* **10**:16. doi:10.1186/s13227-019-0129-2
- 936 Schaeffer V, Althausen C, Shcherbata HR, Deng W-M, Ruohola-Baker H. 2004. Notch-Dependent  
937 Fizzy-Related/Hec1/Cdh1 Expression Is Required for the Mitotic-to-Endocycle Transition in  
938 *Drosophila* Follicle Cells. *Current Biology* **14**:630–636. doi:10.1016/j.cub.2004.03.040
- 939 Schindelin J, Arganda-Carreras I, Frise E, Kaynig V, Longair M, Pietzsch T, Preibisch S, Rueden C,  
940 Saalfeld S, Schmid B, Tinevez J-Y, White DJ, Hartenstein V, Eliceiri K, Tomancak P, Cardona A.  
941 2012. Fiji: an open-source platform for biological-image analysis. *Nat Methods* **9**:676–682.  
942 doi:10.1038/nmeth.2019
- 943 Shcherbata HR. 2004. The mitotic-to-endocycle switch in *Drosophila* follicle cells is executed by  
944 Notch-dependent regulation of G1/S, G2/M and M/G1 cell-cycle transitions. *Development*  
945 **131**:3169–3181. doi:10.1242/dev.01172
- 946 Stern DL, Orgogozo V. 2009. Is Genetic Evolution Predictable? *Science* **323**:746–751.  
947 doi:10.1126/science.1158997
- 948 Swan A, Schüpbach T. 2007. The Cdc20 (Fzy)/Cdh1-related protein, Cort, cooperates with Fzy in  
949 cyclin destruction and anaphase progression in meiosis I and II in *Drosophila*. *Development*  
950 **134**:891–899. doi:10.1242/dev.02784
- 951 Turner JRG. 1981. Adaptation and Evolution in *Heliconius*: A Defense of NeoDarwinism. *Annual*  
952 *Review of Ecology and Systematics* **12**:99–121. doi:10.1146/annurev.es.12.110181.000531
- 953 Van Belleghem SM, Rastas P, Papanicolaou A, Martin SH, Arias CF, Supple MA, Hanly JJ, Mallet J,  
954 Lewis JJ, Hines HM, Ruiz M, Salazar C, Linares M, Moreira GRP, Jiggins CD, Counterman BA,  
955 McMillan WO, Papa R. 2017. Complex modular architecture around a simple toolkit of wing  
956 pattern genes. *Nature Ecology & Evolution* **1**:1–12. doi:10.1038/s41559-016-0052

- 957 VanKuren NW, Massardo D, Nallu S, Kronforst MR. 2019. Butterfly mimicry polymorphisms highlight  
958 phylogenetic limits of gene re-use in the evolution of diverse adaptations. *Mol Biol Evol.*  
959 doi:10.1093/molbev/msz194
- 960 Van't Hof AE, Campagne P, Rigden DJ, Yung CJ, Lingley J, Quail MA, Hall N, Darby AC, Saccheri IJ.  
961 2016. The industrial melanism mutation in British peppered moths is a transposable  
962 element. *Nature* **534**:102–105. doi:10.1038/nature17951
- 963 van't Hof AE, Reynolds LA, Yung CJ, Cook LM, Saccheri IJ. 2019. Genetic convergence of industrial  
964 melanism in three geometrid moths. *Biology Letters* **15**:20190582.  
965 doi:10.1098/rsbl.2019.0582
- 966 Wallbank RWR, Baxter SW, Pardo-Diaz C, Hanly JJ, Martin SH, Mallet J, Dasmahapatra KK, Salazar C,  
967 Joron M, Nadeau N, McMillan WO, Jiggins CD. 2016. Evolutionary Novelty in a Butterfly Wing  
968 Pattern through Enhancer Shuffling. *PLOS Biology* **14**:e1002353.  
969 doi:10.1371/journal.pbio.1002353
- 970 Westerman EL, VanKuren NW, Massardo D, Tenger-Trolander A, Zhang W, Hill RI, Perry M, Bayala E,  
971 Barr K, Chamberlain N, Douglas TE, Buerkle N, Palmer SE, Kronforst MR. 2018. Aristaless  
972 Controls Butterfly Wing Color Variation Used in Mimicry and Mate Choice. *Curr Biol* **28**:3469-  
973 3474.e4. doi:10.1016/j.cub.2018.08.051
- 974 Zhang L, Mazo-Vargas A, Reed RD. 2017a. Single master regulatory gene coordinates the evolution  
975 and development of butterfly color and iridescence. *PNAS* **114**:10707–10712.  
976 doi:10.1073/pnas.1709058114
- 977 Zhang L, Mazo-Vargas A, Reed RD. 2017b. Single master regulatory gene coordinates the evolution  
978 and development of butterfly color and iridescence. *PNAS* **114**:10707–10712.  
979 doi:10.1073/pnas.1709058114  
980
