1 **The gene *cortex* controls scale colour identity in *Heliconius***

2

3 **Luca Livraghi<sup>1,2</sup>, Joseph J. Hanly<sup>1,2,3</sup>, Ling Sheng Loh<sup>2</sup>, Anna Ren<sup>2</sup>, Ian A. Warren<sup>1</sup>, Carolina**  
4 **Concha<sup>2</sup>, Charlotte Wright<sup>1</sup>, Jonah M. Walker<sup>1</sup>, Jessica Foley<sup>2</sup>, Henry Arenas-Castro<sup>2</sup>, Lucas**  
5 **Rene Brenes<sup>2</sup>, Arnaud Martin<sup>3</sup>, W. Owen McMillan<sup>2</sup> and Chris D. Jiggins<sup>1,2</sup>**

6

7 **Author affiliations:**

- 8 1. Department of Zoology, University of Cambridge, Downing St., Cambridge, CB2 3EJ, UK  
9 2. Smithsonian Tropical Research Institute, Gamboa, Panama  
10 3. The George Washington University Department of Biological Sciences, Science and  
11 Engineering Hall 6000, 800 22<sup>nd</sup> St NW Washington, DC 20052, USA

12

13 **Corresponding author:** Luca Livraghi, University of Cambridge, Cambridge, UK. Dept. of Zoology.  
14 ll566@cam.ac.uk.

15 **Funding:**

16 This work was funded by a grant from the BBSRC to CJ and supported LL (BB/R007500/1); the  
17 National Science Foundation awards IOS-1656553 and IOS-1755329 to AM; a Wellcome Trust PhD  
18 studentship awarded to JJH, a Smithsonian Institution grant to WOM and a Balfour-Browne Trust  
19 studentship to J.M.W.

20 **Keywords:**

21 Evolution, wing patterning, *cortex*, *Heliconius*, cell fate, CRISPR, Lepidoptera.

## 22 **Abstract**

23 The wing patterns of butterflies are an excellent system with which to study phenotypic evolution. The  
24 incredibly diverse patterns are generated from an array of pigmented scales on a largely two-  
25 dimensional surface, resulting in a visibly tractable system for studying the evolution of pigmentation.  
26 In *Heliconius* butterflies, much of this diversity is controlled by a few genes of large effect that regulate  
27 pattern switches between races and species across a large mimetic radiation. One of these genes – *cortex*  
28 - has been repeatedly mapped in association with colour pattern evolution in both *Heliconius* and other  
29 Lepidoptera, but we lack functional data supporting its role in modulating wing patterns. Here we  
30 carried out CRISPR knock-outs in multiple *Heliconius* species and show that *cortex* is a major  
31 determinant of scale cell identity. Mutant wing clones lacking *cortex* showed shifts in colour identity,  
32 with melanic and red scales acquiring a yellow or white state. These homeotic transformations include  
33 changes in both pigmentation and scale ultrastructure, suggesting that *cortex* acts during early stages of  
34 scale cell fate specification rather than during the deployment of effector genes. In addition, mutant  
35 clones were observed across the entire wing surface, contrasting with other known *Heliconius* mimicry  
36 loci that act in specific patterns. Cortex is known as a cell-cycle regulator that modulates mitotic entry  
37 in *Drosophila*, and we found the Cortex protein to accumulate in the nuclei of the polyploid scale  
38 building cells of the butterfly wing epithelium, speculatively suggesting a connection between scale cell  
39 endocycling and colour identity. In summary, and while its molecular mode of action remains  
40 mysterious, we conclude that *cortex* played key roles in the diversification of lepidopteran wing patterns  
41 in part due to its switch-like effects in scale identity across the entire wing surface.

42

## 43 Introduction

44 Evolutionary hotspots have become a recurrent theme in evolutionary biology, whereby variation  
45 surrounding homologous loci at both micro- and macro-evolutionary scales have driven parallel cases  
46 of phenotypic change. Notably, a remarkable 138 genes have been linked to phenotypic variation in 2  
47 or more species (GepheBase; Courtier-Orgogozo et al., 2020). In some cases, parallel adaptation has  
48 occurred through the alteration of downstream effector genes, such as pigmentation enzymes with  
49 functions clearly related to the trait under selection (e.g. *tan*, *ebony*). In other cases, upstream patterning  
50 factors are important, and these are typically either transcription factors (e.g. *optix*, *pitx1*, *Sox10*) or  
51 components of signalling pathways such as ligands or receptors (e.g. *WntA*, MC1R). These classes of  
52 genes influence cell fate decisions during development by modulating downstream gene regulatory  
53 networks (Kronforst and Papa, 2015; Martin and Courtier-Orgogozo, 2017; Prud'homme et al., 2007),  
54 and are commonly characterised by highly conserved functions, with rapid evolutionary change  
55 occurring through regulatory fine-tuning of expression patterns. One gene that has been repeatedly  
56 implicated in morphological evolution but is conspicuous in its failure to conform to this paradigm is  
57 *cortex*, a gene implicated in the regulation of adaptive changes in the wing patterning of butterflies and  
58 moths.

59 *Cortex* is one of four major effect genes that act as switch loci controlling both scale structure and colour  
60 patterns in *Heliconius* butterflies, and has been repeatedly targeted by natural selection to drive  
61 differences in pigmentation (Nadeau, 2016; Van Belleghem et al., 2017). Three of the four major effect  
62 genes correspond to the prevailing paradigm of highly conserved patterning genes; the signalling ligand  
63 *WntA* (Concha et al., 2019; Mazo-Vargas et al., 2017) and two transcription factors *optix* (Lewis et al.,  
64 2019; Zhang et al., 2017) and *aristaless1* (Westerman et al., 2018). The fourth is *cortex*, an insect-  
65 specific gene showing closest homology to the *cdc20/fizzy* family of cell cycle regulators (Chu et al.,  
66 2001; Nadeau et al., 2016; Pesin and Orr-Weaver, 2007). The lepidopteran orthologue of *cortex* displays  
67 rapid sequence evolution, and has acquired novel expression domains that correlate with melanic wing  
68 patterns (Nadeau et al., 2016; Saenko et al., 2019). It therefore seems likely that the role of *cortex* in  
69 regulating wing patterns has involved a major shift in function, which sits in contrast to the classic  
70 model of regulatory co-option of deeply conserved patterning genes, that can be readily applied to other  
71 major *Heliconius* patterning loci.

72 The genetic locus containing *cortex* was originally identified in the genus *Heliconius* as controlling  
73 differences in yellow and white wing patterns in *H. melopmene* and *H. erato* (Figure 1a) and the  
74 polymorphism in yellow, white, black and orange elements in *H. numata*, using a combination of  
75 association mapping and gene expression data (Joron et al., 2006; Nadeau et al., 2016). The same locus  
76 has also been repeatedly implicated in controlling colour pattern variation among divergent  
77 Lepidoptera, including the peppered moth *Biston betularia* and other geometrids, the silkmoth *Bombyx*

78 *mori* and other butterflies such as *Bicyclus anynana* and *Papilio clytia* (Beldade et al., 2009; Ito et al.,  
79 2016; VanKuren et al., 2019; Van't Hof et al., 2019; Van't Hof et al., 2016). This locus therefore  
80 contains one or more genes that have repeatedly been targeted throughout the evolutionary history of  
81 the Lepidoptera to generate phenotypic diversity.

82 While *cortex* remains the most likely candidate driving yellow and white scale evolution in *Heliconius*,  
83 other genes at the locus may also be playing a role in establishing scale colour identity. Most notably,  
84 the genes *domeless* (*dome*), a JAK-STAT pathway receptor and *washout* (*wash*), a cytoskeleton  
85 regulator, which also show associations with colour pattern phenotypes in *H. melpomene* and *H. numata*  
86 (Nadeau et al., 2016; Saenko et al., 2019). These genes neighbour a non-coding region linked to the  
87 Bigeye mutation in *B. anynana*, have been implicated in shaping eyespot patterns in CRISPR  
88 mutagenesis experiments, and are within an interval of around 100kb which also includes *cortex*  
89 (Beldade et al., 2009; Lopes da Silva, 2015). It is thus possible that multiple linked genes are  
90 contributing to the evolution of wing patterning across Lepidoptera (Joron et al., 2006; Saenko et al.,  
91 2019).

92 While fantastically diverse, most of the pattern variation in *Heliconius* is created by the differences in  
93 the distribution of only three major scale cell types; Type I (yellow/white), Type II (black), and Type  
94 III (red/orange/brown) (Aymone et al., 2013; Gilbert et al., 1987). Each type has a characteristic  
95 nanostructure and a fixed complement of pigments. Type I yellow scales contain the ommochrome  
96 precursor 3-hydroxykynurenine (3-OHK) (Finkbeiner et al., 2017; Koch, 1993; Reed et al., 2008),  
97 whereas Type I white scales lack pigment, and the colour is the result of the scale cell morphology (i.e.  
98 structural) (Gilbert et al., 1987). In contrast, Type II scale cells are pigmented with melanin and Type  
99 III scale cells contain the red ommochrome pigments xanthommatin and dihydroxanthommatin.

100 Here we focus on the role of *cortex* in *Heliconius* butterflies, an adaptive radiation with over 400  
101 different wing forms in 48 described species (Jiggins, 2017; Lamas, 2004) and where diversity in wing  
102 patterns can be directly linked to the selective forces of predation and sexual selection (Brown, 1981;  
103 Turner, 1981). Specifically, we combine expression profiling using *RNA-seq*, *in situ* hybridization and  
104 antibody staining experiments, as well as CRISPR/Cas9 gene knock-outs to determine the role that this  
105 locus plays in pattern variation of two co-mimetic races of *H. melpomene* and *H. erato* (Figure 1b).

106 Despite the fact that *cortex* does not follow the prevailing paradigm of patterning loci, we demonstrate  
107 for the first time that the gene plays a fundamental role in pattern variation by modulating a switch from  
108 Type I scale cells to Type II and Type III scale cells. Moreover, we show that the phenotypic effects of  
109 *cortex* extend across the fore- and hindwing surface. Our findings, coupled with recent functional  
110 experiments on other *Heliconius* patterning loci, are beginning to illuminate how major patterning genes  
111 interact during development to determine scale cell fate and drive phenotypic variation across a  
112 remarkable adaptive radiation.

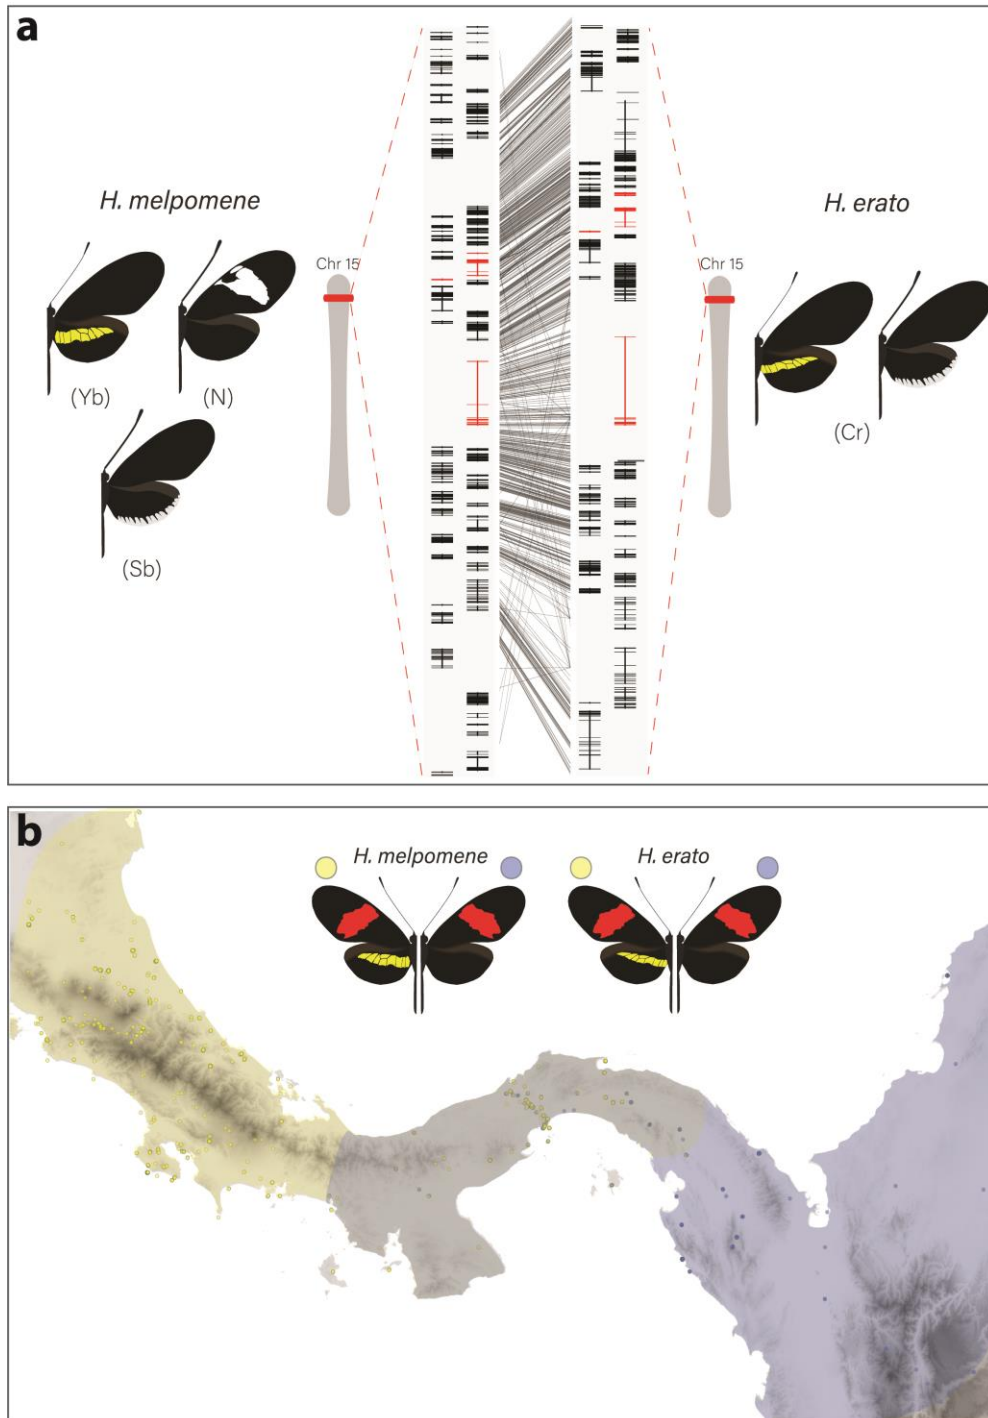

113

**Figure 1 – Ranges of *Heliconius* butterflies differing at Yb phenotypes in Central America and associated loci**

(a) Homologous loci in both species are associated with variation in yellow and white patterns between races. In *H. melpomene* three tightly linked genetic elements located at chromosome 15 control variation for hindwing yellow bar, forewing band and white margin elements (Yb, N and Sb respectively) while in *H. erato* variation has been mapped to one element (Cr). Genes previously associated with wing patterning differences in Lepidoptera are highlighted in red within a specific region of chromosome 15 (from bottom up; *cortex*, *domeless-truncated*, *domeless* and *washout*) and alignment between the two co-mimetic species at the locus is shown (grey lines, 95% alignment identity). (b) Focal co-mimetic races of *Heliconius erato* and *Heliconius melpomene* used in this study, differing for the presence of a hindwing yellow bar, and their ranges across Central America are shown (ranges based on Rosser et al., 2012). Yellow: yellow banded races, blue: black hindwing races, grey: range overlap.

## 114 Results

### 115 **RNA-seq and reannotation of key intervals reveals the presence of duplications and bi-cistronic** 116 **transcription of candidate genes**

117 In order to identify genes associated with differences in yellow pattern elements, we performed  
118 differential gene expression (DGE) analysis using developing wings sampled from colour pattern races  
119 in *H. erato* and *H. melpomene* differing only in the presence or absence of the hindwing yellow bar  
120 (Figure 1b and Figure 2a). In total, we sequenced 18 samples representing three developmental stages  
121 (larval, 36h +/-1.5h (Day 1 pupae) and 60h +/- 1.5h (Day 2 pupae)) from two races in each of the two  
122 species, with hindwings divided into two parts for the pupal stages (Figure 2a). We focused our attention  
123 on genes centred on a 47-gene interval on chromosome 15 previously identified as the minimal  
124 associated region with yellow band phenotypes by recombination mapping (Nadeau et al., 2016, supp  
125 table 1; Joron et al., 2006; Moest et al., 2020; Van Belleghem et al., 2017). Both our initial expression  
126 analysis and recent analysis of selective sweeps at this locus (Moest et al., 2020) indicate that three  
127 genes showed differential expression and are likely targets of selection: *cortex*, *dome* and *wash* (Figure  
128 2c). This led us to further explore the annotation of these genes prior to further analysis.

129 In *Heliconius*, *dome* appears to have duplicated in the ancestor of *H. erato* and *H. melpomene*, resulting  
130 in a full-length copy (referred to here as *domeless*) and a further copy exhibiting truncations at the C-  
131 terminus (*domeless-truncated*) (Supplementary File 1 – Figure S1). Independent tandem duplications  
132 of *dome* have occurred in several other Lepidoptera. Protein alignments indicate that in both *H. erato*  
133 and *H. melpomene*, *dome-trunc* maintains only the N-terminal half of the gene, suggesting *dome-trunc*  
134 is undergoing pseudogenisation.

135 When examining the *RNA-seq* reads mapping to the *dome* and *wash* genes, we observed several  
136 individual reads splicing over the 5' UTR of *wash* and into the coding region of *dome*. It was not  
137 possible to unambiguously assign reads that map to this overlapping portion of the annotation to either  
138 gene, suggesting the possibility that *dome/wash* are transcribed as a single, bi-cistronic transcript. To  
139 look for further evidence of co-transcription, we searched the Transcription Shotgun Assembly (TSA)  
140 sequence archive on NCBI for assembled transcripts containing the open reading frames (ORFs) of both  
141 genes in other Lepidoptera (Supplementary File 2 – Figure S2). We found several instances where ORFs  
142 encoding for both *dome* and *wash* can be found in a single transcript, suggesting bi-cistronic  
143 transcription is a conserved feature across butterflies. Furthermore, an examination of published *ATAC-*  
144 *seq* peaks (Lewis et al., 2019), shows the presence of a single promoter at the start of *dome* for *H. erato*  
145 *lativitta*, suggesting both genes share a single transcription start site (Supplementary File 2 – Figure  
146 S2). Given this result, we repeated the DGE analysis with *dome/wash* as a single annotation.



147 **The genes *cortex* and *domeless/washout* are differentially expressed between colour pattern races,**  
148 **and between wing sections differing in the presence of the hindwing yellow bar**

149 *RNA-seq* data show *cortex* transcripts were most abundant in 5<sup>th</sup> instar larvae, almost depleted in Day 1  
150 pupae, but were again detected at relatively high levels in Day 2 pupae in *H. melpomene*, suggesting  
151 dynamic expression in this species (Figure 2b). In *H. erato*, *cortex* transcripts are found in high  
152 abundance in 5<sup>th</sup> instar larvae but are almost depleted in Day 1 and Day 2 pupae. Both *dome* paralogs  
153 remain relatively constant in terms of expression across all stages in *H. melpomene* whereas *dome-trunc*  
154 expression increases in pupal stages in *H. erato*. *Dome/wash* transcripts are detected in relatively low  
155 and constant amounts in both species.

156 The two species were analysed separately, with both showing only *cortex* and *dome/wash* as  
157 significantly differentially expressed between morphs among the 47 genes in the candidate region, with  
158 *cortex* differential expression occurring earlier in development. In fifth instar larvae, *cortex* is  
159 differentially expressed in both species between the two colour pattern races, with *cortex* showing the  
160 highest adjusted *p*-value for any gene in the genome at this stage in *H. erato* (Figure 2c). Interestingly,  
161 *cortex* transcripts were differentially expressed in opposite directions in the two species, with higher  
162 expression in the melanic hindwing race in *H. melpomene*, and in the yellow banded race in *H. erato*.  
163 This pattern is reversed for *dome/wash* in Day 1 pupae, where a statistically higher proportion of  
164 transcripts are detected in *H. melpomene rosina* (yellow), and in *H. erato hydara* (melanic). No  
165 differential expression of these genes was found at Day 2 pupae. In order to confirm this inverted pattern  
166 was not due to a sampling error, we performed a diagnostic SNP analysis by correlating coding SNPs  
167 found within protein coding genes at the *cortex* locus from whole genome sequence data to the  
168 corresponding *RNA-seq* datasets (Supplementary File 3 – Tables S3.1 and S3.2).

169 When comparing across hindwing sections differing for the yellow bar phenotype, 22 genes out of the  
170 associated 47-gene interval were differentially expressed at Day 1 between relevant wing sections in *H.*  
171 *melpomene*, including *cortex* and *dome/wash* (Supplementary File 4 – Figures S4.1 and S4.2). In  
172 contrast in *H. erato* Day 1 pupae, only *dome/wash* was differentially expressed. At Day 2 pupae, there  
173 were no differentially expressed genes in either species between relevant wing sections at this locus.

174 Given the strong support for the involvement of *cortex* in driving wing patterning differences, we re-  
175 analysed its phylogenetic relationship to other *cdc20* family genes with more extensive sampling than  
176 previous analyses (Nadeau et al., 2016). Our analysis finds strong monophyletic support for *cortex* as  
177 an insect-specific member of the *cdc20* family, with no clear *cortex* homologs found outside of the  
178 Neoptera (Supplementary File 5 – Figure S5.1). Branch lengths indicate *cortex* is evolving rapidly  
179 within the lineage, despite displaying conserved APC/C binding motifs, including the C-Box and IR  
180 tail (Supplementary File 5 – Figure S5.2) (Chu et al., 2001; Pesin and Orr-Weaver, 2007).

181 In summary, *cortex* is the most consistently differentially expressed gene and showed differential  
 182 expression earlier in development as compared to the other candidate *dome/wash*. We therefore focus  
 183 subsequent experiments on *cortex*, although at this stage we cannot rule out an additional role for  
 184 *dome/wash* in pattern specification.

185

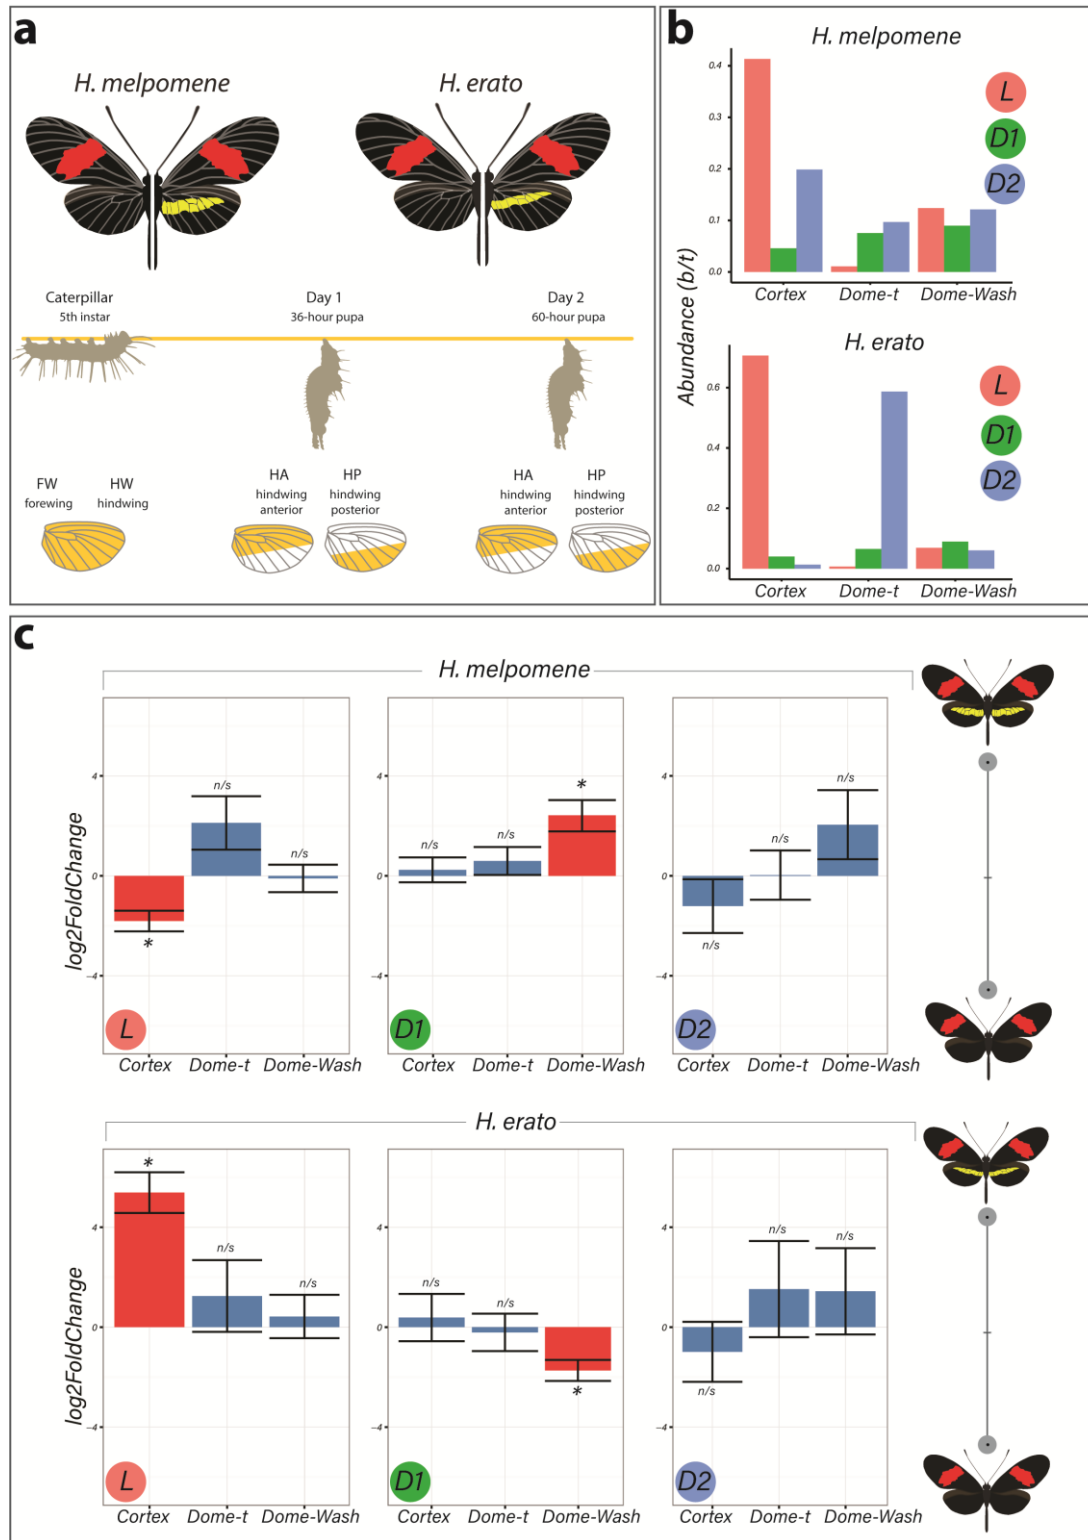

186



**Figure 2 – Differential expression of genes at Chromosome 15 implicate *cortex* as most likely candidate driving yellow bar differences**

(a) Hindwing tissue from co-mimetic races of *H. melpomene* and *H. erato* were collected at three developmental stages (5<sup>th</sup> instar caterpillar, Day 1 Pupae (36hAPF) and Day 2 Pupae (60hAPF)). For pupal tissue, hindwing tissue was dissected using the wing vein landmarks shown, corresponding to the future adult position of the hindwing yellow bar (dissection scheme based on Hanly et al., 2019). (b) Relative abundance of transcripts corresponding to the genes *cortex*, *domeless-truncated*, *domeless/washout* throughout developmental stages. *Cortex* expression decreases from larval to pupal stages *domeless-truncated* expression increases, whereas *domeless/washout* stay relatively constant at all three stages. (c) Log<sub>2</sub>FoldChange for the genes *cortex*, *domeless-truncated*, *domeless/washout* across developmental stages. Comparisons are for whole wing discs (Larvae, L) and for contrast C for pupae (D1 and D2; see Supplementary File 4: Figure S4.3 for depiction of contrasts analysed).

187

188 ***Cortex* transcripts localise distally in 5<sup>th</sup> instar larvae**

189 Two studies have reported that *cortex* mRNA expression correlates with melanic patch in two species  
190 of *Heliconius* (Nadeau et al., 2016 and Saenko et al., 2019). To further assess this relationship between  
191 *cortex* expression and adult wing patterns, we performed *in situ* hybridisation on developing wing discs  
192 of 5<sup>th</sup> instar larvae, where we observed largest *cortex* transcript abundance, in both the yellow-barred  
193 and plain hindwing morphs of *H. erato* and *H. melpomene*. *Cortex* transcripts at this stage localised  
194 distally in forewings and hindwings of both species (Figure 3). In *H. erato demophoon*, expression was  
195 strongest at the intervein midline, but extends across vein compartments covering the distal portion of  
196 both forewing and hindwing. By contrast, in *H. erato hydara*, *cortex* transcripts are more strongly  
197 localised to the intervein midline forming a distally localised intervein expression domain.

198 Expression in *H. melpomene rosina* is similar to *H. erato demophoon* at comparable developmental  
199 stages, again with stronger expression localised to the intervein midline but extending further  
200 proximally than in *H. erato demophoon*. In *H. melpomene melpomene*, hindwing *cortex* expression  
201 extends across most of the hindwing, and does not appear to be restricted to the intervein midline.

202 Given that *cortex* has been implicated in modulating wing patterns in many divergent lepidoptera, we  
203 examined localisation in a *Heliconius* species displaying distinct patterns: *H. hecale melicerta* (Figure  
204 3). Interestingly, in this species transcripts appear strongest in regions straddling the wing disc veins,  
205 with weak intervein expression observed only in the hindwings. Previous data has shown variation in  
206 yellow spots (Hspot) is also controlled by a locus located a chromosome 15 (Huber et al., 2015).  
207 Expression in *H. hecale melicerta* forewings corresponds to melanic regions located in between yellow  
208 spots at the wing margins, indicating *cortex* may be modulating Hspot variation in *H. hecale*.

209 Overall, our results suggest a less clear correlation to melanic elements than reported expression  
210 patterns (Nadeau et al., 2016; Saenko et al., 2019) where *cortex* expression in 5<sup>th</sup> instar caterpillars is  
211 mostly restricted to the distal regions of developing wings, but appears likely to be dynamic across 5<sup>th</sup>  
212 instar development.

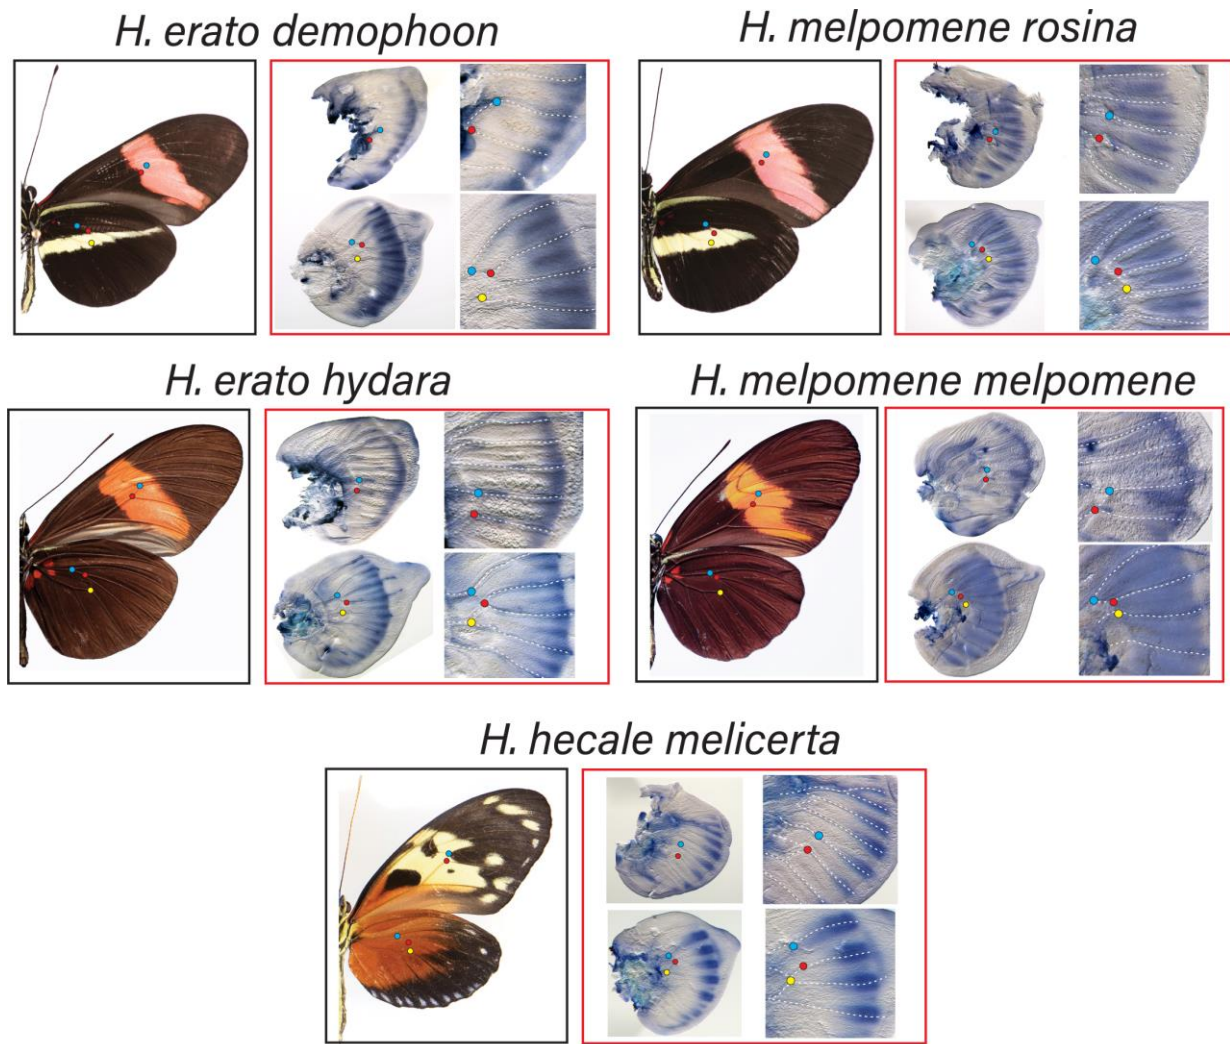

213

**Figure 3 – Expression of *cortex* transcripts in *H. melpomene*, *H. erato* and *H. hecale* 5<sup>th</sup> instar wing discs**

*Cortex* expression in 5<sup>th</sup> instar wing discs is restricted to the distal end of both forewings and hindwings in all species and morphs analysed. In *H. erato*, expression is strongest at the intervein midline but extends across vein compartments in *H. erato demophoon*, whereas it is more strongly localised to the intervein midline in *H. erato hy dara*. In *H. melpomene rosina*, *cortex* localises in a similar manner to *H. erato demophoon*, with stronger expression again observed at the intervein midline, whereas expression in *H. melpomene melpomene* extends more proximally. Coloured dots represent homologous vein landmarks across the wings.

214 ***Cortex* establishes Type II and III scale identity in *Heliconius* butterflies**

215 To assay the function of *cortex* during wing development, we used CRISPR/Cas9 to generate G<sub>0</sub>  
216 somatic mosaic mutants (crispants) (Mazo-Vargas et al., 2017; Zhang et al., 2017). We targeted  
217 multiple exons using a combination of different guides and genotyped the resulting mutants through  
218 PCR amplification, cloning and Sanger sequencing (Supplementary File 6 – Figure S6). Overall KO  
219 efficiency was low when compared to similar studies in *Heliconius* (Concha et al., 2019; Mazo-Vargas  
220 et al., 2017), with observed wing phenotype to hatched eggs ratios ranging from 0.3% to 4.8%. Lethality

221 was also high, with hatched to adult ratios ranging from 8.1% to 29.8% (Supplementary File 7 – Table  
222 S7.1).

223 Targeting of the *cortex* gene in *H. erato* produced patches of ectopic yellow and white scales spanning  
224 regions across both forewings and hindwings (Figure 4 and Supplementary File 8 – Figures S8.1-S8.7).  
225 Both colour pattern races were affected in a similar manner in *H. erato*. Mutant clones were not  
226 restricted to any specific wing region, affecting scales in both proximal and distal portions of wings.  
227 The same effect on scale pigmentation was also observed in the co-mimetic morphs in *H. melpomene*,  
228 with mutant clones affecting both distal and proximal regions in forewings and hindwings. In *H. erato*  
229 *hydara*, we recovered a mutant individual where clones spanned the dorsal forewing band. Clones  
230 affecting this region caused what appears to be an asymmetric deposition of pigment across the scales,  
231 as well as transformation to white, unpigmented scales (Figure 5 and Supplementary File 9 – Figure  
232 S9).

233 As this locus has been associated with differences in white hindwing margin phenotypes (Jiggins and  
234 McMillan, 1997) (Figure 1b), we also targeted *cortex* in mimetic races showing this phenotype, *H. erato*  
235 *cyrbia* and *H. melpomene cythera*. Mutant scales in these colour pattern races were also localised across  
236 both wing surfaces, with both white and yellow ectopic scales. In these races, a positional effect was  
237 observed, where ectopic scales in the forewing and anterior compartment of the hindwing shifted to  
238 yellow, and posterior hindwing scales became white (Figure 4 and Supplementary File 9 – Figure S9).  
239 This positional effect likely reflects differential uptake of the yellow pigment 3-OHK across the wing  
240 surface (Reed et al., 2008). For one individual of *H. erato cyrbia*, clones also extended across the red  
241 band where a shift to white scales was observed, as in *H. erato hydara*.

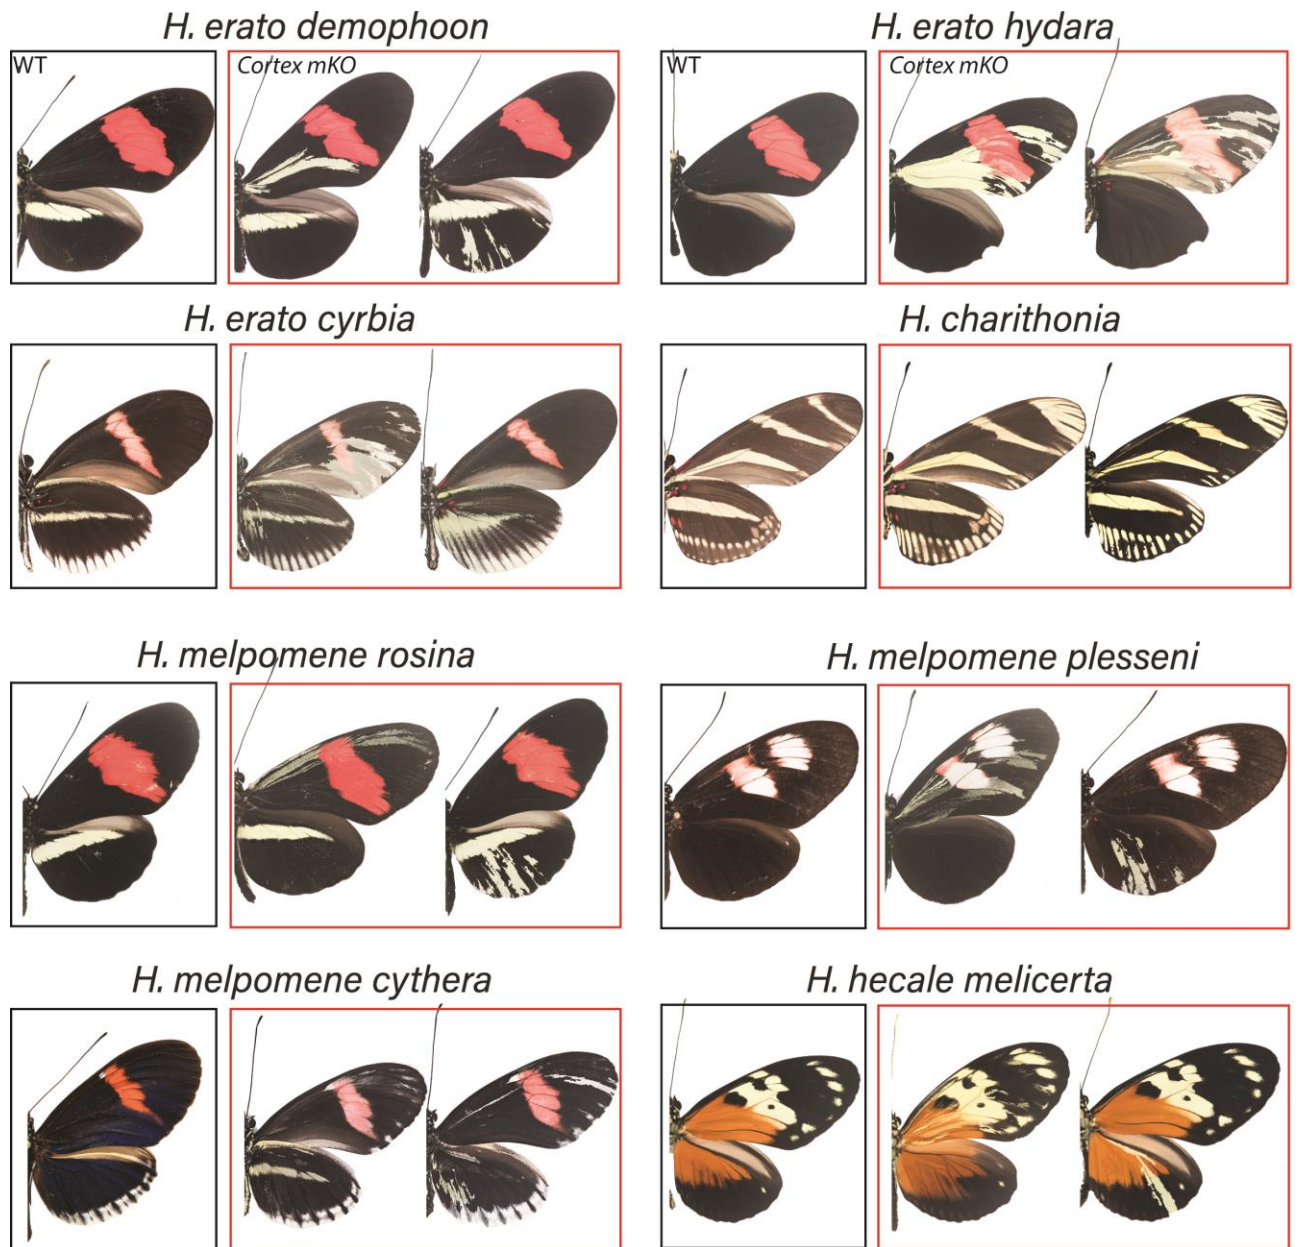

242

**Figure 4 – *Cortex* loss of function transforms scale identity across the entire wing surface**

Phenotypes of *cortex* mKO across *Heliconius* species and morphs reveals a loss of melanic (Type II) and red (Type III) scales, and transformation to Type I (yellow or white) scales. Affected regions are not spatially restricted, and span both distal and proximal portions of forewings and hindwings. A positional effect is observed in some races, where ectopic Type I scales are either white or yellow depending on their position along the wing (e.g. *H. erato cyrbia*). Ectopic Type I scales can be induced from both melanic and red scales, switching to either white or yellow depending on wing position and race. Boundaries between Wild-type (WT) to mutant scales are highlighted (dotted white line).

243 To further test the conservation of *cortex* function across the *Heliconius* radiation, we knocked out  
244 *cortex* in *H. charithonia* and *H. hecale melicerta*, outgroups to *H. erato* and *H. melpomene* respectively.  
245 Again, ectopic yellow and white scales appeared throughout the wing surface in both species,  
246 suggesting conserved function with respect to scale development among *Heliconius* butterflies. In *H.*



247 *hecale melicerta*, we also recovered a mutant where we saw transformation from orange ommochrome  
248 scales to yellow.

249 In summary, *cortex* crispants appear to not be restricted to any specific wing pattern elements, and  
250 instead affect regions across the surface of both forewings and hindwings. Mutant scales are always  
251 Type I scales, with differing pigmentation (3-OHK, yellow) or structural colouration (white) depending  
252 on race and wing position (Figure 5). The high rate of mosaicism combined with high mortality rates  
253 suggests *cortex* is likely developmentally lethal. Furthermore, the sharp boundaries observed between  
254 wild-type and mutant scales suggest *cortex* functions in a cell-autonomous manner, with little or no  
255 communication between neighbouring cells (Figure 5 and Supplementary File 9 - Figure S9).

256

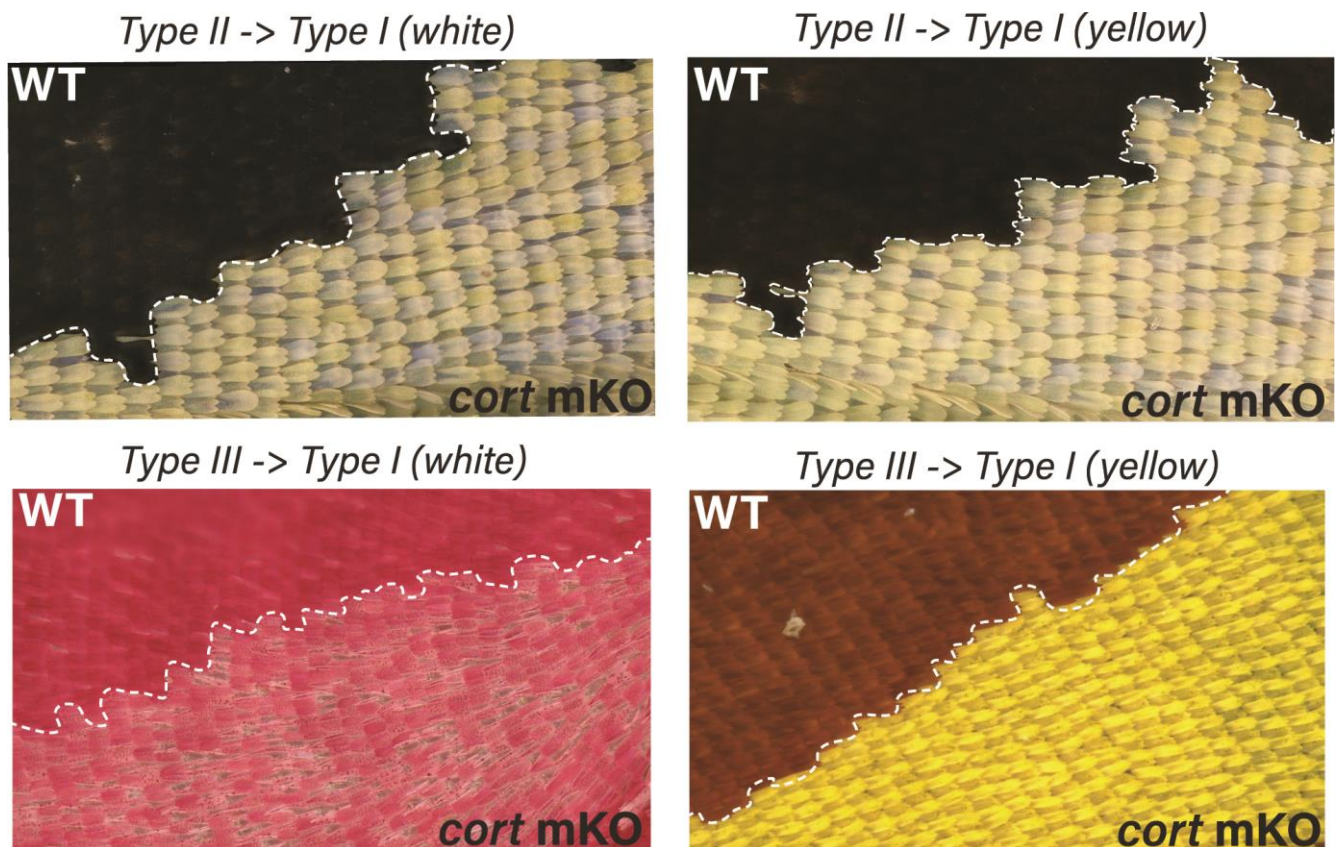

257

258

**Figure 5 – CRISPR KOs induce Type I scale identity**

Ectopic Type I scales can be induced from both melanic and red scales, switching to either white or yellow depending on wing position and race. Boundaries between Wild-type (WT) to mutant scales are highlighted (dotted white line).

259 **Nuclear localization of Cortex extends across the wing surface in pupal wings**

260 The *cortex* mRNA expression patterns in larval imaginal disks suggest a dynamic progression in the  
261 distal regions, and in a few cases (Figure 3; Nadeau et al., 2016; Saenko et al., 2019) a correlation with  
262 melanic patterns whose polymorphisms associate with genetic variation at the Cortex locus itself. We  
263 thus long hypothesized that like for the *WntA* mimicry gene (Martin et al., 2012, Mazo-Vargas 2017 et  
264 al., Concha et al., 2020), the larval expression domains of *cortex* would delimit the wing territories  
265 where it is playing an active role in colour patterning. However, our CRISPR based loss-of-function  
266 experiments challenge that hypothesis because in all the morphs that we assayed, we found mutant  
267 scales across the wing surface (Figure 6 and supplementary File 9 – Figure S9).

268 This led us to re-examine our model and consider that post-larval stages of Cortex expression could  
269 reconcile the observation of scale phenotypes across the entire wing, rather than in limited areas of the  
270 wing patterns. To test this hypothesis, we developed a Cortex polyclonal antibody, and found nuclear  
271 expression across the epithelium of *H. erato demophoon* pupal hindwings without restriction to specific  
272 pattern element (Figure 6). This nuclear localization overlapped with DNA, also included a strong signal  
273 in the large nucleoli of both the polyploid scale building cells, and their adjacent, non-polyploid  
274 epithelial cells (Greenstein, 1972). Following previous reports suggesting a correlation between  
275 pigmentation state and ploidy level (Cho and Nijhout, 2013; Henke and Pohley, 1952; Iwata and Otaki,  
276 2016), we tested if nuclear volume or nucleoli number would associate with the yellow band, but failed  
277 to find a consistent pattern in the distribution of Cortex protein (Figure 6 and Supplementary File 10 -  
278 Figure S10). However, currently we cannot rule an association of Cortex protein with colour pattern  
279 elements at other developmental stages, and given the apparent dynamic nature of *cortex* expression, a  
280 more precise developmental time series will be required to make more conclusive statements.



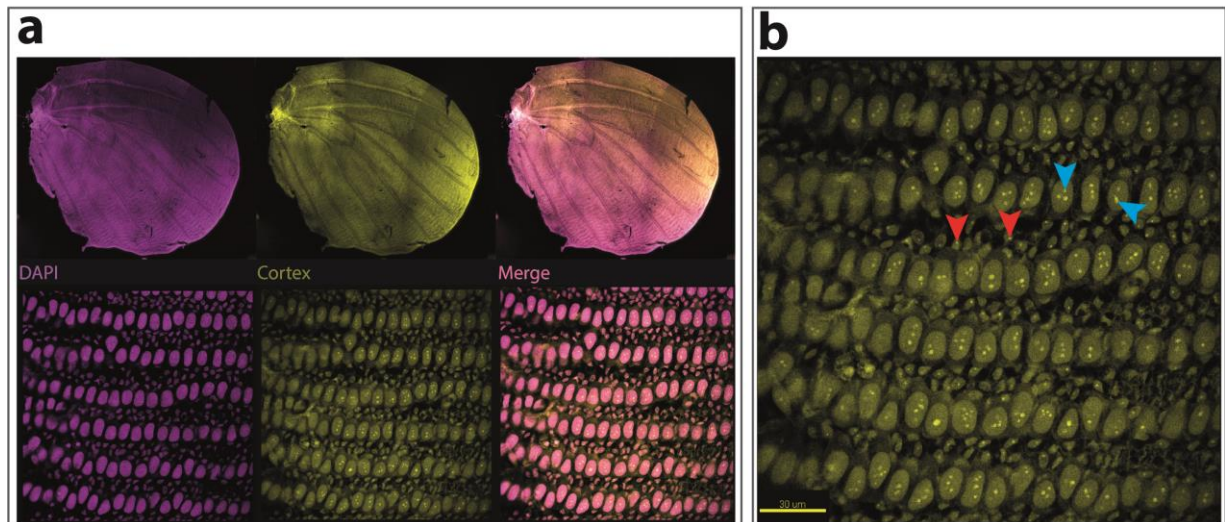

281

**Figure 6 – Cortex protein localises throughout pupal hindwings in *H. erato demophoon***

(a) Cortex immunostaining reveals presence of Cortex across the hindwing of *H. erato demophoon*. DAPI (left) Cortex (middle) and merged channels (right) are shown. (b) Cortex localises as puncta in the developing pupal cells. Multiple puncta per cell are visible in the large polyploid nuclei (blue arrows) while single puncta localise to the uninuclear epithelium below (red arrows). Scale bar = 30µm.

## 282 ***Cortex* KO causes homeotic shifts in scale structure.**

283 Previous studies have shown an association between scale ultrastructure and pigmentation in *Heliconius*  
284 butterflies (Concha et al., 2019; Gilbert et al., 1987; Zhang et al., 2017). With this in mind, we tested  
285 whether ectopic yellow/white scales were accompanied by structural homeosis using Scanning Electron  
286 Microscopy. To account for known positional effects on scale structure we compared wild-type and  
287 mutant scales from homologous locations across the wing surface.

288 Ultrastructural differences are consistent with homeosis in *cortex* mutant scales in both *H. melpomene*  
289 and *H. erato* (Figure 7). Cross-rib distance is the same between yellow wild-type and *cortex* mutant  
290 scales, and significantly different between distally located wild-type black scales. A similar relationship  
291 was observed for scale length in both species, but inter-ridge distance and scale width was consistent  
292 with homeosis only in *H. melpomene* (Supplementary File 11 – Figure S11). A consistent difference  
293 between all Type I scales (mutant and wild-type) is the presence of a lamina covering the inter-ridge  
294 space (Figure 7b), suggesting this structure is an important morphological feature of yellow/white scales  
295 (Matsuoka and Monteiro, 2018), and that *cortex* is necessary for the differentiation of lamellar tissue in  
296 *Heliconius* scales.

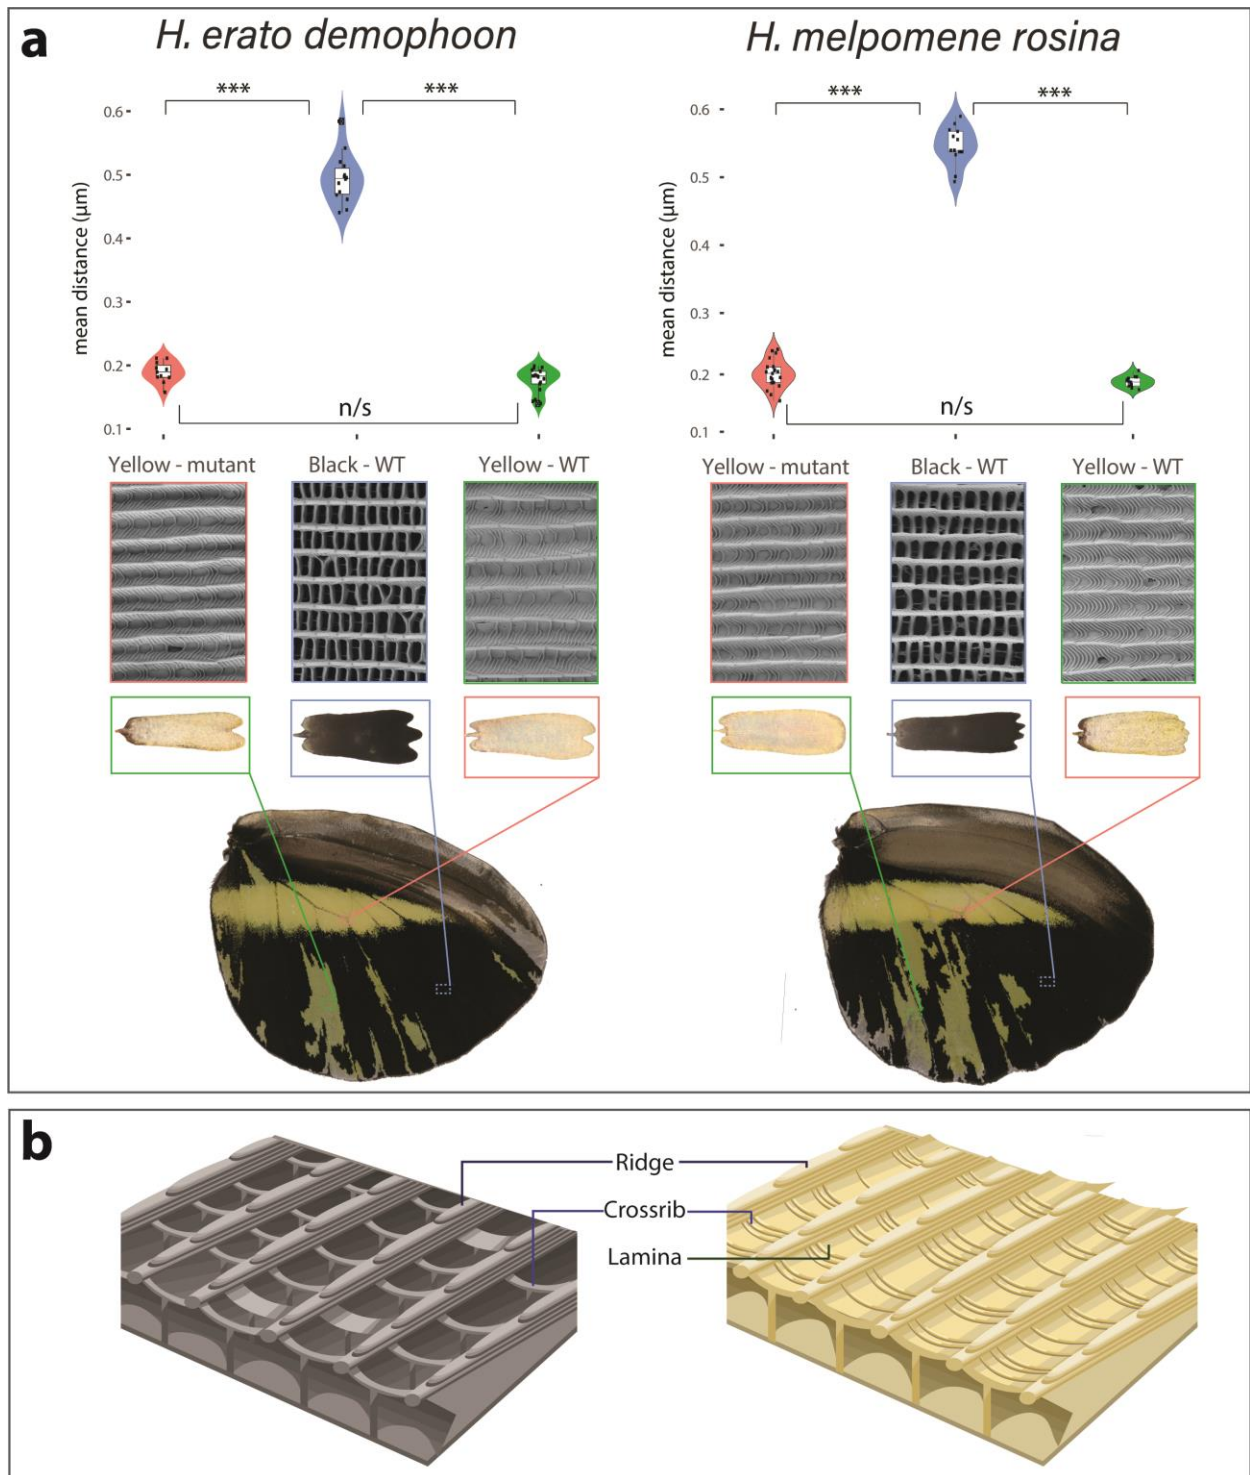

297

**Figure 7 – SEM reveals structural homeosis is induced in *cortex* KO scales.**

Structural homeosis is induced in *cortex* KO scales in both *H. melpomene* and *H. erato*. Mutant and wild-type scale comparisons from homologous wing positions are shown, illustrating clear ultrastructural homeosis between wild-type and KO yellow scales. Mean cross-rib distance between wild-type and mutant yellow scales is not significantly different, while significantly different between both wild-type yellow and mutant yellow with wild-type black scales (Wilcoxon test, \*\*\* indicates  $p < 0.001$ ).

298

## 299 **Discussion:**

### 300 ***Cortex* is a key scale cell specification gene**

301 The genetic locus containing the gene *cortex* represents a remarkable case of parallel evolution, where  
302 repeated and independent mutations surrounding the gene are associated with shifts in scale  
303 pigmentation state in at least 8 divergent species of Lepidoptera (Beldade et al., 2009; Nadeau et al.,  
304 2016; Van Belleghem et al., 2017; VanKuren et al., 2019; van't Hof et al., 2019; Van't Hof et al., 2016).  
305 While these studies have linked putative regulatory variation around *cortex* to the evolution of wing  
306 patterns, its precise effect on scale cell identity and pigmentation has remained speculative until now.  
307 Here, we demonstrate that *cortex* is a causative gene that specifies melanic and red (Type II and Type  
308 III) scale cell identity in *Heliconius*, and acts by influencing both downstream pigmentation pathways  
309 and scale cell ultrastructure. Moreover, our combination of expression studies and functional knock-  
310 outs demonstrate that this gene acts as a key early scale cell specification switch across the wing surface  
311 of *Heliconius* butterflies, and thus has the potential to generate much broader pattern variation than  
312 previously described patterning genes.

313 While we have shown that *cortex* is a key scale cell specification gene, it remains unclear how a gene  
314 with homology to the fizzy/cdc20 family of cell cycle regulators acts to modulate scale identity. In  
315 *Drosophila*, Fizzy proteins are known to regulate APC/C activity through the degradation of cyclins,  
316 leading to the arrest of mitosis (Raff et al., 2002). In particular, *fizzy-related* (*fzr*), induces a switch from  
317 the mitotic cycle to the endocycle, allowing the development of polyploid follicle cells in *Drosophila*  
318 ovaries (Schaeffer et al., 2004; Shcherbata, 2004). Similarly *cortex* has been shown to downregulate  
319 cyclins during *Drosophila* female meiosis, through its interaction with the APC/C (Pesin and Orr-  
320 Weaver, 2007; Swan and Schüpbach, 2007). Cortex Immunostainings show that Cortex protein  
321 localises to the nucleus in *Heliconius* pupal wings, suggesting a possible interaction with the APC/C in  
322 butterfly scale building cells. Ploidy levels in Lepidoptera scale cells have been shown to correlate with  
323 pigmentation state, where increased ploidy and scale size lead to darker scales (Cho and Nijhout, 2013;  
324 Iwata and Otaki, 2016). *cortex* may thus be modulating ploidy levels by inducing endoreplication cycles  
325 in developing scale cells. However, we currently have no direct evidence for a causal relationship  
326 between ploidy state and pigmentation output, and a mechanistic understanding of this relationship and  
327 any role *cortex* may be playing in modulating ploidy levels will require future investigation.

### 328 ***Heliconius* wing patterning is controlled by interactions among major patterning genes**

329 Functional knockouts now exist for all the 4 major loci known to drive pigmentation differences in  
330 *Heliconius* (Mazo-Vargas et al., 2017; Westerman et al., 2018; Zhang et al., 2017). These loci represent  
331 the major switching points in the GRNs that are ultimately responsible for determining scales cell  
332 identity. This work underscores the importance of two patterning loci, *cortex* and *WntA*, as master

333 regulators of scale cell identity. Both are upregulated early in wing development and have broad effects  
334 on pattern variation (Concha et al., 2019; Nadeau et al., 2016). The signalling molecule *WntA* modulates  
335 forewing band shape in *Heliconius* by delineating boundaries around patterns elements, and is expressed  
336 in close association with future pattern elements (Concha et al., 2019; Martin et al., 2012). Unlike *cortex*  
337 mutants, *WntA* KOs shift scale cell identity to all three cell Types (I, II and III), depending on genetic  
338 background. Thus, *WntA* acts as a spatial patterning signal inducing or inhibiting colour in specific wing  
339 elements, in contrast to *cortex*, which acts as an “on-off” switch across all scales on the butterfly wing.

340 Interestingly, *cortex* knockouts lead to shifts in scale fate irrespective of *WntA* expression. This suggests  
341 either that *cortex* is required as an inductive signal to allow *WntA* to signal further melanisation, or that  
342 two, independent ways to melanise a scale are available to the developing wing. The latter hypothesis  
343 is supported by certain *H. erato* colour pattern *WntA* mutants, where even in putatively *cortex* positive  
344 regions, scales are able to shift to Type I in the absence of *WntA* alone (Concha et al., 2019). This  
345 suggests that while under certain conditions *cortex* is sufficient to induce the development of black  
346 scales, *WntA* is also required as a further signal for melanisation in some genetic backgrounds. Under  
347 this scenario, colour pattern morphs may be responding epistatically to different *WntA/cortex* alleles  
348 present in their respective genetic backgrounds.

349 Under a simple model (Figure 8), *cortex* is one of the earliest regulators and sets scale differentiation to  
350 a specific pathway switches between Type I (yellow/white) and Type II/III (black/red) scales. Thus, we  
351 can envision a differentiating presumptive scale cell (PSC) receiving a Cortex input as becoming Type  
352 II/III competent, with complete Type III differentiation occurring in the presence of *optix* expression  
353 (Zhang et al., 2017). This is consistent with our data, which shows *cortex* is also required as a signal  
354 for Type III (red) scales to properly develop. Several *cortex* mutant individuals had clones across red  
355 pattern elements, and failed to properly develop red pigment. The development of red scales in  
356 *Heliconius* butterflies is also dependent on expression of the transcription factor *optix* during mid-pupal  
357 development (Lewis et al., 2019; Reed et al., 2011; Zhang et al., 2017). Therefore, *cortex* expression is  
358 required for either downstream signalling to *optix*, or to induce a permissive scale morphology for the  
359 synthesis and deposition of red pigment in future scales. *Cortex* is thus necessary for the induction of  
360 Type III scale cells but insufficient for their proper development.

361 Conversely, a PSC lacking a Cortex input differentiates into a Type I scale, whose pigmentation state  
362 depends on the presence of the transcription factor *aristaless1* (*all*), where *all* is responsible for  
363 inducing a switch from yellow to white scales in *Heliconius* by affecting the deposition of the yellow  
364 pigment 3-OHK (Westerman et al., 2018). The uptake of 3-OHK from the haemolymph occurs very  
365 late in wing development, right before the adult ecloses (Reed et al., 2008). Our *cortex* crispants  
366 revealed a shift to both yellow and white scales, with their appearance being positionally dependent;  
367 more distally located scales generally switch to white, while more proximal scales become yellow



368 (Supplementary File 8 and 9). This pigmentation state is likely controlled by differences in *all*  
 369 expression varying between wing sections in different ways across races.

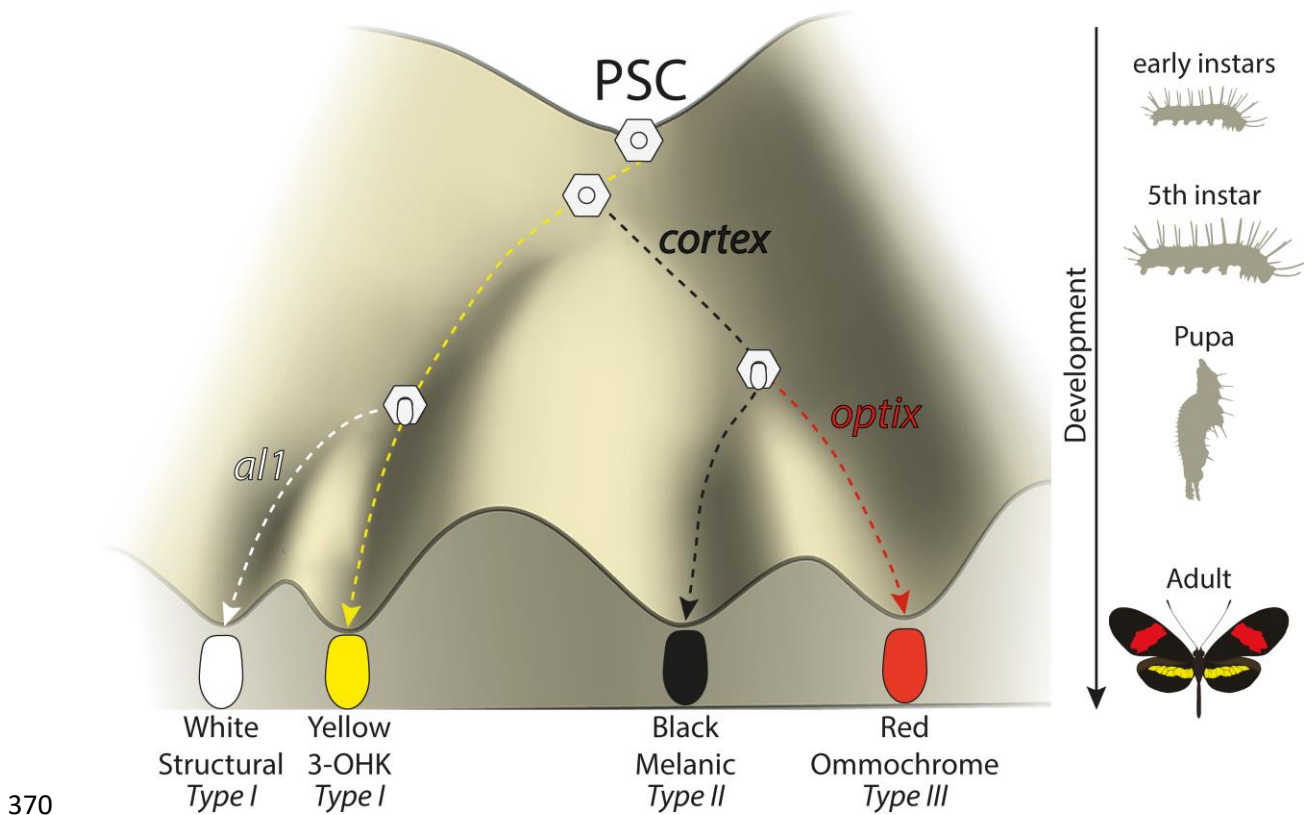

**Figure 8 – Expression of key genes affect scale fate decisions and influence downstream pigmentation state**

During early instar development, wing disc cells differentiate into presumptive scale cells (PSCs). Throughout 5<sup>th</sup> instar growth, PSCs express key scale cell specification genes such as *cortex*, which induce differentiation into Type II (*optix* -) scales or Type III (*optix* +) scales. In the absence of *cortex*, scale cells differentiate into Type I scales which differ in pigmentation state based on 3-OHK synthesis controlled by *aristalless1* expression. Model based on the epigenetic landscape (Waddington).

371 However, the switch induced by Cortex under this model is likely not a simple binary toggle, and is  
 372 perhaps dependent on a given protein threshold or heterochrony in expression rather than  
 373 presence/absence, as we find that Cortex protein also localises to the presumptive yellow bar in  
 374 developing pupal wings. Moreover, the *RNA-seq* data presented suggests other linked genes may also  
 375 be playing a role in controlling pattern switches between *Heliconius* races. In particular, we report the  
 376 presence of a bi-cistronic transcript containing the ORFs of the genes *dome* and *wash*, which are  
 377 differentially expressed during early pupal wing development. While a precise role for *dome/wash* in  
 378 wing patterning remains to be demonstrated, it raises the possibility that multiple linked genes co-  
 379 operate during *Heliconius* wing development to drive pattern diversity. It is noteworthy that in the  
 380 locally polymorphic *H. numata*, all wing pattern variation is controlled by inversions surrounding *cortex*

381 and *dome/wash*, both of which are also differentially expressed in *H. numata* (Saenko et al., 2019). This  
382 raises the interesting possibility that evolution has favoured the interaction of multiple genes at the locus  
383 that have since become locked into a supergene in *H. numata*.

#### 384 **Conclusions:**

385 The utilization of ‘hotspots’ in evolution has become a recurring theme of evolutionary biology, with  
386 several examples in which independent mutations surrounding the same gene have driven adaptive  
387 evolution (e.g *Pitx1*, *Scute*) (Stern and Orgogozo, 2009). One proposed facilitator of such hotspots is  
388 through the action of genes acting as “input-output” modules, whereby complex spatio-temporal  
389 information is translated into a co-ordinated cell differentiation program, in a simple switch like manner.  
390 One prediction of the nature of such genes would be a switch-like behaviour such as that observed for  
391 *cortex* in this study, as well as the presence of a complex modular *cis*-regulatory architecture  
392 surrounding the gene that is able to integrate the complex upstream positional information into the  
393 switch-like output. A conserved feature of the *cortex* locus in Lepidoptera is the presence of large  
394 intergenic regions surrounding the gene, with evidence these may be acting as modular *cis*-regulatory  
395 switches in *Heliconius* (Enciso-Romero et al., 2017; Van Belleghem et al., 2017), fitting the predicted  
396 structure of input-output genes. Unlike canonical input-output loci however, *cortex* expression appears  
397 not to be restricted to any particular colour pattern element in any given species/race, and yet is capable  
398 of producing a switch-like output (Type I vs Type II/III scales).

399 The genetic locus containing the gene *cortex* has now been implicated in driving wing patterning  
400 differences in many divergent Lepidoptera, and represents one of the more striking cases of parallel  
401 evolution to date. We have shown that it is spatially regulated during larval development, and yet shows  
402 wing-wide cell fate phenotypes leading to a switch in scale cell fate. The amenability of *cortex* to  
403 evolutionary change suggests it may be occupying an unusual position in the GRN underlying scale cell  
404 identity, and may be acting as an input/output gene (Stern and Orgogozo, 2009) that integrates upstream  
405 positional information into a simple on-off switch for scale differentiation. However, it is still unclear  
406 how *cortex* mechanistically affects pigmentation differences, and given its widespread usage throughout  
407 Lepidoptera, it is of general interest to understand its role in driving scale pigmentation.

408



## 409 **Materials and Methods**

### 410 **Butterfly husbandry**

411 *Heliconius* butterflies were collected in the tropical forests of Panama and Ecuador. Adults were  
412 provided with an artificial diet of pollen/glucose solution supplemented with flowers of *Psiguria*,  
413 *Lantana* and/or *Psychotria alata* according to availability. Females were provided with *Passiflora* plants  
414 for egg laying (*P. menispermifolia* for *H. melpomene*, *P. biflora* for *H. erato* and *H. charithonia*, and  
415 *P. vitifolia* for *H. hecale*). Eggs were collected daily, and caterpillars reared on fresh shoots of *P.*  
416 *williamsi* (*melpomene*), *P. biflora* (*erato* and *charithonia*) and *P. vitifolia* for *H. hecale*. Late 5th (final)  
417 instar, caterpillars were separated into individual pots in a temperature-monitored room for *RNA-seq*  
418 experiments, where they were closely observed for the purpose of accurate developmental staging.

### 419 **Phylogenetic analysis of *domeless* and *cortex***

420 To identify orthologs of *dome* across the Lepidoptera we performed tBLASTn searches using the  
421 previously annotated *H. melpomene* Hmel2 (Hm) and *H. erato demophoon* V1 (Hed) *dome* sequences  
422 against the genomes of *Operophtera brumata* V1 (Ob), *Trichoplusia ni* Hi5.VO2 (Tn), *Bombyx mori*  
423 ASM15162v1 (Bm), *Manduca sexta* 1.0 (Ms), *Plodia interpunctella* V1 (Pi), *Amyeolis transitella* V1  
424 (At), *Phoebis sennae* V1.1 (Ps), *Bicyclus anynana* V1.2 (Ba), *Danaus plexippus* V3 (Dp), *Dryas iulia*  
425 helico3 (Di), *Agraulis vanillae* helico3 (Av), *Heliconius erato lativitta* V1 (Hel) genomes found on  
426 Lepbase (Challis et al., 2016). As a trichopteran outgroup we used a recently published Pacbio assembly  
427 of *Stenopsyche tienmushanensis* (St) (Luo et al., 2018). Recovered amino acid translations were aligned  
428 using clustal omega (F. et al., 2019). The resulting alignments were used to produce a phylogenetic tree  
429 using PhyML (Guindon et al., 2010), based on a best fit model using AIC criterion (selected model was  
430 JTT + G + I + F). The tree was visualised and re-rooted to the Trichopteran outgroup using FigTree.

431 To confirm *cortex* as a *cdc20* gene, we retrieved full-length protein homologs from TBLASTN searches  
432 and used them to generate a curated alignment with MAFFT/Guidance2 with a column threshold of 0.5.  
433 We then constructed a maximum-likelihood tree using W-IQ-TREE with the “Auto” function to find a  
434 best-fit model of substitution.

### 435 **Tissue sampling and *RNA-Seq***

436 *H. melpomene rosina* and *H. erato demophoon* butterflies were collected around Gamboa, Panama; *H.*  
437 *melpomene melpomene* and *H. erato hydara* butterflies were collected around Puerto Lara, Darien,  
438 Panama. Methodology for sample preparation and sequencing was performed as previously described  
439 (Hanly et al., 2019). The datasets generated and/or analysed during the current study are available in  
440 the SRA repository (PRJNA552081). Reads from each species were aligned to the respective genome  
441 assemblies Hmel2 (Davey et al., 2016) and Herato\_demophoon\_v1 (Van Belleghem et al., 2017),

442 available on using Hisat2 with default parameters (Kim et al., 2019). The genomes and annotations used  
443 are publicly available at [www.lepbase.org](http://www.lepbase.org). Reads were counted with HTSeq-count in union mode  
444 (Anders et al., 2015) and statistical analysis performed with the R package DESeq2 (Love et al., 2014),  
445 using the GLMI;

446 ~ individual + compartment\*race

447 (Compartments: Anterior Hindwing (HA), Posterior Hindwing (HPo)). *H. melpomene* and *H. erato*  
448 were analysed separately; homology between genes was determined by reciprocal BLAST. Contrasts  
449 were then extracted for comparison of race, compartment, and race given the effect of compartment,  
450 alternating the race used as the base level.

### 451 ***In situ* hybridizations**

452 Fifth instar larval wing disks and whole mount *in situ* hybridizations were performed following a  
453 published procedure (Martin and Reed, 2014) and imaged using a Leica S4E microscope (Leica  
454 Microsystems). Riboprobe synthesis was performed using the following primers from a 5<sup>th</sup> instar wing  
455 disc cDNA library extracted from *H. melpomene*:

456 Forward primer 5' – CCCGAGATTCTTTCAGCGAAAC -3' and Reverse primer 5' –  
457 ACCGCTCCAACACCAAGAAG – 3'. Templates for riboprobes were designed by attaching a T7  
458 promoter through PCR and performing a DIG labelled transcription reaction (Roche). The same *H.*  
459 *melpomene* probe was used in all *in situ* hybridisation experiments. The resulting probe spanned from  
460 Exon 2 to Exon 7 and was 841bp long.

### 461 **Immunohistochemistry and image analysis**

462 Pupal wings were dissected around 60 to 70 h post pupation in PBS and fixed at room temperature with  
463 fix buffer (400 µl 4% paraformaldehyde, 600 µl PBS 2mM EGTA) for 30 min. Subsequent washes  
464 were done in wash buffer (0.1% Triton-X 100 in PBS) before blocking the wings at 4°C in block buffer  
465 (0.05 g Bovine Serum Albumin, 10 ml PBS 0.1% Triton-X 100). Wings were then incubated in primary  
466 antibodies against Cortex (1:200, monoclonal rabbit anti-Cortex) at 4°C overnight, washed and added  
467 in secondary antibody (1:500, donkey anti-rabbit IgG, AlexaFlour 555, ThermoFisher Scientific A-  
468 31572). Before mounting, wings were incubated in DAPI with 50% glycerol overnight and finally  
469 transferred to mounting medium (60% glycerol/ 40% PBS 2mM EGTA) for imaging.

470 Z-stacked 2-channelled confocal images were acquired using a Zeiss Cell Observer Spinning Disk  
471 Confocal microscope. Image processing was done using FIJI plugins Trainable Weka Segmentation  
472 and BioVoxxel (Arganda-Carreras et al., 2017; Brocher, Jan, 2014; Schindelin et al., 2012). Manual  
473 tracing of nuclei was input for machine learning and processing of images to obtain final thresholded  
474 images, then an overlay of Cortex puncta with DAPI nuclei staining identified regions of nuclei

475 containing Cortex puncta. Spatial analysis of image data was conducted using R software 4.0.0 package  
476 Spatstat (Baddeley and Turner, 2005).

#### 477 **CRISPR/Cas9 genome editing**

478 Guide RNAs were designed corresponding to GGN<sub>20</sub>NGG sites located within the *cortex* coding region  
479 using the program Geneious (Kearse et al., 2012). To increase target specificity, guides were checked  
480 against an alignment of both *melpomene* and *erato* re-sequence data at the scaffolds containing the  
481 *cortex* gene (Moest et al., 2020; Van Belleghem et al., 2017), and selected based on sequence  
482 conservation across populations. Based on these criteria, each individual guide was checked against the  
483 corresponding genome for off-target effects, using the default Geneious algorithm. Guide RNAs with  
484 high conservation and low off-target scores were then synthesised following the protocol by Bassett  
485 and Liu, 2014. Injections were performed following procedures described in Mazo-Vargas et al., 2017,  
486 within 1-4 hours of egg laying. Several combinations of guide RNAs for separate exons at different  
487 concentrations were used for different injection experiments (Supplementary File 7). For *H. charithonia*  
488 we used the *H. erato* specific guides and for *H. hecale* we used the *H. melpomene* guides.

#### 489 **Genotyping**

490 DNA was extracted from mutant leg tissue and amplified using oligonucleotides flanking the sgRNAs  
491 target region (Supplementary File 6). PCR amplicons were column purified, subcloned into the pGEM-  
492 T Easy Vector System (Promega) and sequenced on an ABI 3730 sequencer.

#### 493 **Scanning Electron Microscopy (SEM) Imaging**

494 Individual scales from wild type and mutant regions of interest were collected by brushing the surface  
495 of the wing with an eyelash tool, then dusted onto an SEM stub with double-sided carbon tape. Stubs  
496 were then colour imaged under the Keyence VHX-5000 microscope for registration of scale type.  
497 Samples were sputter-coated with one 12.5 nm layer of gold for improving sample conductivity. SEM  
498 images were acquired on a FEI Teneo LV SEM, using secondary electrons (SE) and an Everhart-  
499 Thornley detector (ETD) using a beam energy of 2.00 kV, beam current of 25 pA, and a 10 µs dwell  
500 time. Individual images were stitched using the Maps 3.10 software (ThermoFisher Scientific).

#### 501 **Morphometrics analysis**

502 Morphometric measurements of scale widths and ridge distances were carried out on between 10 and  
503 20 scales of each type, using a custom semi-automated R pipeline that derives ultrastructural  
504 parameters from large SEM images (Day et al., 2019). Briefly, ridge spacing was assessed by Fourier  
505 transforming intensity traces of the ridges acquired from the FIJI software (Schindelin et al.,  
506 2012). Scale width was directly measured in FIJI by manually tracing a line, orthogonal to the ridges,  
507 at the section of maximal width.

## 508 **Author Contributions**

509 C.D.J., L.L., J.J.H., A.M., and W.O.M. designed the research; L.L., J.J.H., L.S.L., A.R., I.A.W.,  
510 C.C., C.W., J.M.W., J.F., H.A.C., L.R.B. performed research. L.L wrote the paper.

## 511 **Acknowledgements**

512 We thank Oscar Paneso, Elizabeth Evans, Rachel Crisp and Cruz Batista, for technical support with  
513 rearing of butterflies and CRISPR larvae, and to Markus Möest, Steven Van Belleghem and Tim  
514 Thurman for assistance with butterfly collection. We are also grateful to Krzysztof “Chris” Kozak and  
515 Chi Yun for thoughtful discussions and feedback on the manuscript. We thank the GW Nanofabrication  
516 and Imaging Center for enabling SEM, and in particular Christine Brantner and Anastas Popratiloff for  
517 their technical assistance

## 518 **Competing interests**

519 The authors declare no competing interests.

520

## 521 **References**

- 522 Anders S, Pyl PT, Huber W. 2015. HTSeq—a Python framework to work with high-throughput  
523 sequencing data. *Bioinformatics* **31**:166–169. doi:10.1093/bioinformatics/btu638
- 524 Arganda-Carreras I, Kaynig V, Rueden C, Eliceiri KW, Schindelin J, Cardona A, Sebastian Seung H.  
525 2017. Trainable Weka Segmentation: a machine learning tool for microscopy pixel  
526 classification. *Bioinformatics* **33**:2424–2426. doi:10.1093/bioinformatics/btx180
- 527 Aymone ACB, Valente VLS, de Araújo AM. 2013. Ultrastructure and morphogenesis of the wing  
528 scales in *Heliconius erato phyllis* (Lepidoptera: Nymphalidae): What silvery/brownish  
529 surfaces can tell us about the development of color patterning? *Arthropod Structure &*  
530 *Development* **42**:349–359. doi:10.1016/j.asd.2013.06.001
- 531 Baddeley A, Turner R. 2005. spatstat: An R Package for Analyzing Spatial Point Patterns. *Journal of*  
532 *Statistical Software* **12**:1–42. doi:10.18637/jss.v012.i06
- 533 Bassett A, Liu J-L. 2014. CRISPR/Cas9 mediated genome engineering in *Drosophila*. *Methods* **69**:128–  
534 136. doi:10.1016/j.ymeth.2014.02.019
- 535 Beldade P, Saenko SV, Pul N, Long AD. 2009. A Gene-Based Linkage Map for *Bicyclus anynana*  
536 Butterflies Allows for a Comprehensive Analysis of Synteny with the Lepidopteran Reference  
537 Genome. *PLOS Genetics* **5**:e1000366. doi:10.1371/journal.pgen.1000366

- 538 Brocher, Jan. 2014. Qualitative and Quantitative Evaluation of Two New Histogram Limiting  
539 Binarization Algorithms. *Computer Science Journals* **8**:30–48.
- 540 Brown KS. 1981. The Biology of Heliconius and Related Genera. *Annual Review of Entomology*  
541 **26**:427–457. doi:10.1146/annurev.en.26.010181.002235
- 542 Challi RJ, Kumar S, Dasmahapatra KK, Jiggins CD, Blaxter M. 2016. Lepbase: the Lepidopteran  
543 genome database. *bioRxiv* 056994. doi:10.1101/056994
- 544 Cho EH, Nijhout HF. 2013. Development of polyploidy of scale-building cells in the wings of *Manduca*  
545 *sexta*. *Arthropod Struct Dev* **42**:37–46. doi:10.1016/j.asd.2012.09.003
- 546 Chu T, Henrion G, Haegeli V, Strickland S. 2001. Cortex, a *Drosophila* gene required to complete  
547 oocyte meiosis, is a member of the Cdc20/fizzy protein family. *Genesis* **29**:141–152.  
548 doi:10.1002/gene.1017
- 549 Concha C, Wallbank RWR, Hanly JJ, Fenner J, Livraghi L, Rivera ES, Paulo DF, Arias C, Vargas M,  
550 Sanjeev M, Morrison C, Tian D, Aguirre P, Ferrara S, Foley J, Pardo-Diaz C, Salazar C, Linares  
551 M, Massardo D, Counterman BA, Scott MJ, Jiggins CD, Papa R, Martin A, McMillan WO. 2019.  
552 Interplay between Developmental Flexibility and Determinism in the Evolution of Mimetic  
553 Heliconius Wing Patterns. *Current Biology* S0960982219313168.  
554 doi:10.1016/j.cub.2019.10.010
- 555 Courtier-Orgogozo V, Arnoult L, Prigent SR, Wiltgen S, Martin A. 2020. Gephebase, a database of  
556 genotype–phenotype relationships for natural and domesticated variation in Eukaryotes.  
557 *Nucleic Acids Res* **48**:D696–D703. doi:10.1093/nar/gkz796
- 558 Davey JW, Chouteau M, Barker SL, Maroja L, Baxter SW, Simpson F, Merrill RM, Joron M, Mallet J,  
559 Dasmahapatra KK, Jiggins CD. 2016. Major Improvements to the *Heliconius melpomene*  
560 Genome Assembly Used to Confirm 10 Chromosome Fusion Events in 6 Million Years of  
561 Butterfly Evolution. *G3: Genes, Genomes, Genetics* **6**:695–708. doi:10.1534/g3.115.023655
- 562 Day CR, Hanly JJ, Ren A, Martin A. 2019. Sub-micrometer insights into the cytoskeletal dynamics and  
563 ultrastructural diversity of butterfly wing scales. *Dev Dyn* **248**:657–670. doi:10.1002/dvdy.63
- 564 Enciso-Romero J, Pardo-Díaz C, Martin SH, Arias CF, Linares M, McMillan WO, Jiggins CD, Salazar C.  
565 2017. Evolution of novel mimicry rings facilitated by adaptive introgression in tropical  
566 butterflies. *Molecular Ecology* **26**:5160–5172. doi:10.1111/mec.14277
- 567 F M, Ym P, J L, N B, T G, N M, P B, Arn T, Sc P, Rd F, R L. 2019. The EMBL-EBI search and sequence  
568 analysis tools APIs in 2019. *Nucleic Acids Res* **47**:W636–W641. doi:10.1093/nar/gkz268
- 569 Finkbeiner SD, Fishman DA, Osorio D, Briscoe AD. 2017. Ultraviolet and yellow reflectance but not  
570 fluorescence is important for visual discrimination of conspecifics by *Heliconius erato*.  
571 *Journal of Experimental Biology* **220**:1267–1276. doi:10.1242/jeb.153593

- 572 Gilbert LE, Forrest HS, Schultz TD, Harvey DJ. 1987. Correlations of ultrastructure and pigmentation  
573 suggest how genes control development of wing scales of Heliconius butterflies. *The Journal*  
574 *of research on the Lepidoptera (USA)*.
- 575 Greenstein ME. 1972. The ultrastructure of developing wings in the giant silkworm, *Hyalophora*  
576 *cecropia*. II. Scale-forming and socket-forming cells. *J Morphol* **136**:23–51.  
577 doi:10.1002/jmor.1051360103
- 578 Guindon S, Dufayard J-F, Lefort V, Anisimova M, Hordijk W, Gascuel O. 2010. New Algorithms and  
579 Methods to Estimate Maximum-Likelihood Phylogenies: Assessing the Performance of  
580 PhyML 3.0. *Systematic Biology* **59**:307–321. doi:10.1093/sysbio/syq010
- 581 Hanly JJ, Wallbank RWR, McMillan WO, Jiggins CD. 2019. Conservation and flexibility in the gene  
582 regulatory landscape of heliconiine butterfly wings. *EvoDevo* **10**:15. doi:10.1186/s13227-  
583 019-0127-4
- 584 Henke K, Pohley H-J. 1952. Differentielle Zellteilungen und Polyploidie bei der Schuppenbildung der  
585 Mehlmotte *Ephestia kühniella* Z. *Zeitschrift für Naturforschung B* **7**:65–79. doi:10.1515/zn-  
586 1952-0201
- 587 Huber B, Whibley A, Poul YL, Navarro N, Martin A, Baxter S, Shah A, Gilles B, Wirth T, McMillan WO,  
588 Joron M. 2015. Conservatism and novelty in the genetic architecture of adaptation in  
589 *Heliconius* butterflies. *Heredity* **114**:515–524. doi:10.1038/hdy.2015.22
- 590 Ito K, Katsuma S, Kuwazaki S, Jouraku A, Fujimoto T, Sahara K, Yasukochi Y, Yamamoto K, Tabunoki H,  
591 Yokoyama T, Kadono-Okuda K, Shimada T. 2016. Mapping and recombination analysis of two  
592 moth colour mutations, Black moth and Wild wing spot, in the silkworm *Bombyx mori*.  
593 *Heredity* **116**:52–59. doi:10.1038/hdy.2015.69
- 594 Iwata M, Otaki JM. 2016. Spatial patterns of correlated scale size and scale color in relation to color  
595 pattern elements in butterfly wings. *Journal of Insect Physiology* **85**:32–45.  
596 doi:10.1016/j.jinsphys.2015.11.013
- 597 Jiggins CD. 2017. *The Ecology and Evolution of Heliconius Butterflies*. Oxford University Press.
- 598 Jiggins CD, McMillan WO. 1997. The genetic basis of an adaptive radiation: warning colour in two  
599 *Heliconius* species. *Proc Biol Sci* **264**:1167–1175. doi:10.1098/rspb.1997.0161
- 600 Joron M, Papa R, Beltrán M, Chamberlain N, Mavárez J, Baxter S, Abanto M, Bermingham E,  
601 Humphray SJ, Rogers J, Beasley H, Barlow K, H. ffrench-Constant R, Mallet J, McMillan WO,  
602 Jiggins CD. 2006. A Conserved Supergene Locus Controls Colour Pattern Diversity in  
603 *Heliconius* Butterflies. *PLoS Biol* **4**:e303. doi:10.1371/journal.pbio.0040303
- 604 Kearse M, Moir R, Wilson A, Stones-Havas S, Cheung M, Sturrock S, Buxton S, Cooper A, Markowitz S,  
605 Duran C, Thierer T, Ashton B, Meintjes P, Drummond A. 2012. Geneious Basic: an integrated



- 606 and extendable desktop software platform for the organization and analysis of sequence  
607 data. *Bioinformatics* **28**:1647–1649. doi:10.1093/bioinformatics/bts199
- 608 Kim D, Paggi JM, Park C, Bennett C, Salzberg SL. 2019. Graph-based genome alignment and  
609 genotyping with HISAT2 and HISAT-genotype. *Nat Biotechnol* **37**:907–915.  
610 doi:10.1038/s41587-019-0201-4
- 611 Koch PB. 1993. Production of [14C]-Labeled 3-Hydroxy-L-Kynurenine in a Butterfly, *Heliconius*  
612 *charitonia* L. (Heliconidae), and Precursor Studies in Butterfly Wing Ommatins. *Pigment Cell*  
613 *Research* **6**:85–90. doi:10.1111/j.1600-0749.1993.tb00586.x
- 614 Kronforst MR, Papa R. 2015. The Functional Basis of Wing Patterning in *Heliconius* Butterflies: The  
615 Molecules Behind Mimicry. *Genetics* **200**:1–19. doi:10.1534/genetics.114.172387
- 616 Lamas G, editor. 2004. Atlas Of Neotropical Lepidoptera: Checklist Pt. 4a Hesperioidea-papilionoidea.  
617 Gainesville: Scientific Pub.
- 618 Lewis JJ, Geltman RC, Pollak PC, Rondem KE, Belleghem SMV, Hubisz MJ, Munn PR, Zhang L, Benson  
619 C, Mazo-Vargas A, Danko CG, Counterman BA, Papa R, Reed RD. 2019. Parallel evolution of  
620 ancient, pleiotropic enhancers underlies butterfly wing pattern mimicry. *PNAS* **116**:24174–  
621 24183. doi:10.1073/pnas.1907068116
- 622 Lopes da Silva C. 2015. Genetics of diversification: a hotspot locus for pigmentation evolution  
623 (Masters Thesis). Lisboa: Universidad de Lisboa.
- 624 Love MI, Huber W, Anders S. 2014. Moderated estimation of fold change and dispersion for RNA-seq  
625 data with DESeq2. *Genome Biol* **15**:550. doi:10.1186/s13059-014-0550-8
- 626 Luo S, Tang M, Frandsen PB, Stewart RJ, Zhou X. 2018. The genome of an underwater architect, the  
627 caddisfly *Stenopsyche tienmushanensis* Hwang (Insecta: Trichoptera). *Gigascience* **7**.  
628 doi:10.1093/gigascience/giy143
- 629 Martin A, Courtier-Orgogozo V. 2017. Morphological Evolution Repeatedly Caused by Mutations in  
630 Signaling Ligand Genes In: Sekimura T, Nijhout HF, editors. Diversity and Evolution of  
631 Butterfly Wing Patterns: An Integrative Approach. Singapore: Springer. pp. 59–87.  
632 doi:10.1007/978-981-10-4956-9\_4
- 633 Martin A, Papa R, Nadeau NJ, Hill RI, Counterman BA, Halder G, Jiggins CD, Kronforst MR, Long AD,  
634 McMillan WO, Reed RD. 2012. Diversification of complex butterfly wing patterns by  
635 repeated regulatory evolution of a Wnt ligand. *Proc Natl Acad Sci USA* **109**:12632–12637.  
636 doi:10.1073/pnas.1204800109
- 637 Martin A, Reed RD. 2014. Wnt signaling underlies evolution and development of the butterfly wing  
638 pattern symmetry systems. *Developmental Biology* **395**:367–378.  
639 doi:10.1016/j.ydbio.2014.08.031

- 640 Matsuoka Y, Monteiro A. 2018. Melanin Pathway Genes Regulate Color and Morphology of Butterfly  
641 Wing Scales. *Cell Reports* **24**:56–65. doi:10.1016/j.celrep.2018.05.092
- 642 Mazo-Vargas A, Concha C, Livraghi L, Massardo D, Wallbank RWR, Zhang L, Papador JD, Martinez-  
643 Najera D, Jiggins CD, Kronforst MR, Breuker CJ, Reed RD, Patel NH, McMillan WO, Martin A.  
644 2017. Macroevolutionary shifts of WntA function potentiate butterfly wing-pattern diversity.  
645 *PNAS* **114**:10701–10706. doi:10.1073/pnas.1708149114
- 646 Moest M, Belleghem SMV, James JE, Salazar C, Martin SH, Barker SL, Moreira GRP, Mérot C, Joron M,  
647 Nadeau NJ, Steiner FM, Jiggins CD. 2020. Selective sweeps on novel and introgressed  
648 variation shape mimicry loci in a butterfly adaptive radiation. *PLOS Biology* **18**:e3000597.  
649 doi:10.1371/journal.pbio.3000597
- 650 Nadeau NJ. 2016. Genes controlling mimetic colour pattern variation in butterflies. *Current Opinion*  
651 *in Insect Science, Global change biology \* Molecular physiology* **17**:24–31.  
652 doi:10.1016/j.cois.2016.05.013
- 653 Nadeau NJ, Pardo-Diaz C, Whibley A, Supple MA, Saenko SV, Wallbank RWR, Wu GC, Maroja L,  
654 Ferguson L, Hanly JJ, Hines H, Salazar C, Merrill RM, Dowling AJ, ffrench-Constant RH,  
655 Llaurens V, Joron M, McMillan WO, Jiggins CD. 2016. The gene cortex controls mimicry and  
656 crypsis in butterflies and moths. *Nature* **534**:106–110. doi:10.1038/nature17961
- 657 Pesin JA, Orr-Weaver TL. 2007. Developmental Role and Regulation of cortex, a Meiosis-Specific  
658 Anaphase-Promoting Complex/Cyclosome Activator. *PLOS Genetics* **3**:e202.  
659 doi:10.1371/journal.pgen.0030202
- 660 Prud'homme B, Gompel N, Carroll SB. 2007. Emerging principles of regulatory evolution. *PNAS*  
661 **104**:8605–8612. doi:10.1073/pnas.0700488104
- 662 Raff JW, Jeffers K, Huang J. 2002. The roles of Fzy/Cdc20 and Fzr/Cdh1 in regulating the destruction  
663 of cyclin B in space and time. *J Cell Biol* **157**:1139–1149. doi:10.1083/jcb.200203035
- 664 Reed RD, McMillan WO, Nagy LM. 2008. Gene expression underlying adaptive variation in *Heliconius*  
665 wing patterns: non-modular regulation of overlapping cinnabar and vermilion prepatterns.  
666 *Proc Biol Sci* **275**:37–46. doi:10.1098/rspb.2007.1115
- 667 Reed RD, Papa R, Martin A, Hines HM, Counterman BA, Pardo-Diaz C, Jiggins CD, Chamberlain NL,  
668 Kronforst MR, Chen R, Halder G, Nijhout HF, McMillan WO. 2011. optix drives the repeated  
669 convergent evolution of butterfly wing pattern mimicry. *Science* **333**:1137–1141.  
670 doi:10.1126/science.1208227
- 671 Rosser N, Phillimore AB, Huertas B, Willmott KR, Mallet J. 2012. Testing historical explanations for  
672 gradients in species richness in heliconiine butterflies of tropical America: DIVERSIFICATION

- 673 OF BUTTERFLIES. *Biological Journal of the Linnean Society* **105**:479–497. doi:10.1111/j.1095-  
674 8312.2011.01814.x
- 675 Saenko SV, Chouteau M, Piron-Prunier F, Blugeon C, Joron M, Llaurens V. 2019. Unravelling the  
676 genes forming the wing pattern supergene in the polymorphic butterfly *Heliconius numata*.  
677 *Evodevo* **10**:16. doi:10.1186/s13227-019-0129-2
- 678 Schaeffer V, Althausen C, Shcherbata HR, Deng W-M, Ruohola-Baker H. 2004. Notch-Dependent  
679 Fizzy-Related/Hec1/Cdh1 Expression Is Required for the Mitotic-to-Endocycle Transition in  
680 *Drosophila* Follicle Cells. *Current Biology* **14**:630–636. doi:10.1016/j.cub.2004.03.040
- 681 Schindelin J, Arganda-Carreras I, Frise E, Kaynig V, Longair M, Pietzsch T, Preibisch S, Rueden C,  
682 Saalfeld S, Schmid B, Tinevez J-Y, White DJ, Hartenstein V, Eliceiri K, Tomancak P, Cardona A.  
683 2012. Fiji: an open-source platform for biological-image analysis. *Nat Methods* **9**:676–682.  
684 doi:10.1038/nmeth.2019
- 685 Shcherbata HR. 2004. The mitotic-to-endocycle switch in *Drosophila* follicle cells is executed by  
686 Notch-dependent regulation of G1/S, G2/M and M/G1 cell-cycle transitions. *Development*  
687 **131**:3169–3181. doi:10.1242/dev.01172
- 688 Stern DL, Orgogozo V. 2009. Is Genetic Evolution Predictable? *Science* **323**:746–751.  
689 doi:10.1126/science.1158997
- 690 Swan A, Schüpbach T. 2007. The Cdc20 (Fzy)/Cdh1-related protein, Cort, cooperates with Fzy in  
691 cyclin destruction and anaphase progression in meiosis I and II in *Drosophila*. *Development*  
692 **134**:891–899. doi:10.1242/dev.02784
- 693 Thayer RC, Allen FI, Patel NH. 2020. Structural color in *Junonia* butterflies evolves by tuning scale  
694 lamina thickness. *eLife* **9**:e52187. doi:10.7554/eLife.52187
- 695 Turner JRG. 1981. Adaptation and Evolution in *Heliconius*: A Defense of NeoDarwinism. *Annual*  
696 *Review of Ecology and Systematics* **12**:99–121. doi:10.1146/annurev.es.12.110181.000531
- 697 Van Belleghem SM, Rastas P, Papanicolaou A, Martin SH, Arias CF, Supple MA, Hanly JJ, Mallet J,  
698 Lewis JJ, Hines HM, Ruiz M, Salazar C, Linares M, Moreira GRP, Jiggins CD, Counterman BA,  
699 McMillan WO, Papa R. 2017. Complex modular architecture around a simple toolkit of wing  
700 pattern genes. *Nature Ecology & Evolution* **1**:1–12. doi:10.1038/s41559-016-0052
- 701 VanKuren NW, Massardo D, Nallu S, Kronforst MR. 2019. Butterfly mimicry polymorphisms highlight  
702 phylogenetic limits of gene re-use in the evolution of diverse adaptations. *Mol Biol Evol.*  
703 doi:10.1093/molbev/msz194
- 704 Van't Hof AE, Campagne P, Rigden DJ, Yung CJ, Lingley J, Quail MA, Hall N, Darby AC, Saccheri IJ.  
705 2016. The industrial melanism mutation in British peppered moths is a transposable  
706 element. *Nature* **534**:102–105. doi:10.1038/nature17951

- 707 van't Hof AE, Reynolds LA, Yung CJ, Cook LM, Saccheri IJ. 2019. Genetic convergence of industrial  
708 melanism in three geometrid moths. *Biology Letters* **15**:20190582.  
709 doi:10.1098/rsbl.2019.0582
- 710 Westerman EL, VanKuren NW, Massardo D, Tenger-Trolander A, Zhang W, Hill RI, Perry M, Bayala E,  
711 Barr K, Chamberlain N, Douglas TE, Buerkle N, Palmer SE, Kronforst MR. 2018. Aristaless  
712 Controls Butterfly Wing Color Variation Used in Mimicry and Mate Choice. *Curr Biol* **28**:3469-  
713 3474.e4. doi:10.1016/j.cub.2018.08.051
- 714 Zhang L, Mazo-Vargas A, Reed RD. 2017. Single master regulatory gene coordinates the evolution  
715 and development of butterfly color and iridescence. *PNAS* **114**:10707–10712.  
716 doi:10.1073/pnas.1709058114
