# Supplementary material for: Cortex cis-regulatory switches establish scale colour identity and pattern diversity in Heliconius
Source: bioRxiv or medRxiv preprint supplement (doi:10.1101/2020.05.26.116533), 2021-03-17
Supplement: Supplementary file [file media-1.pdf]

Supplementary File 1: *Domeless* duplication history in the Lepidoptera.

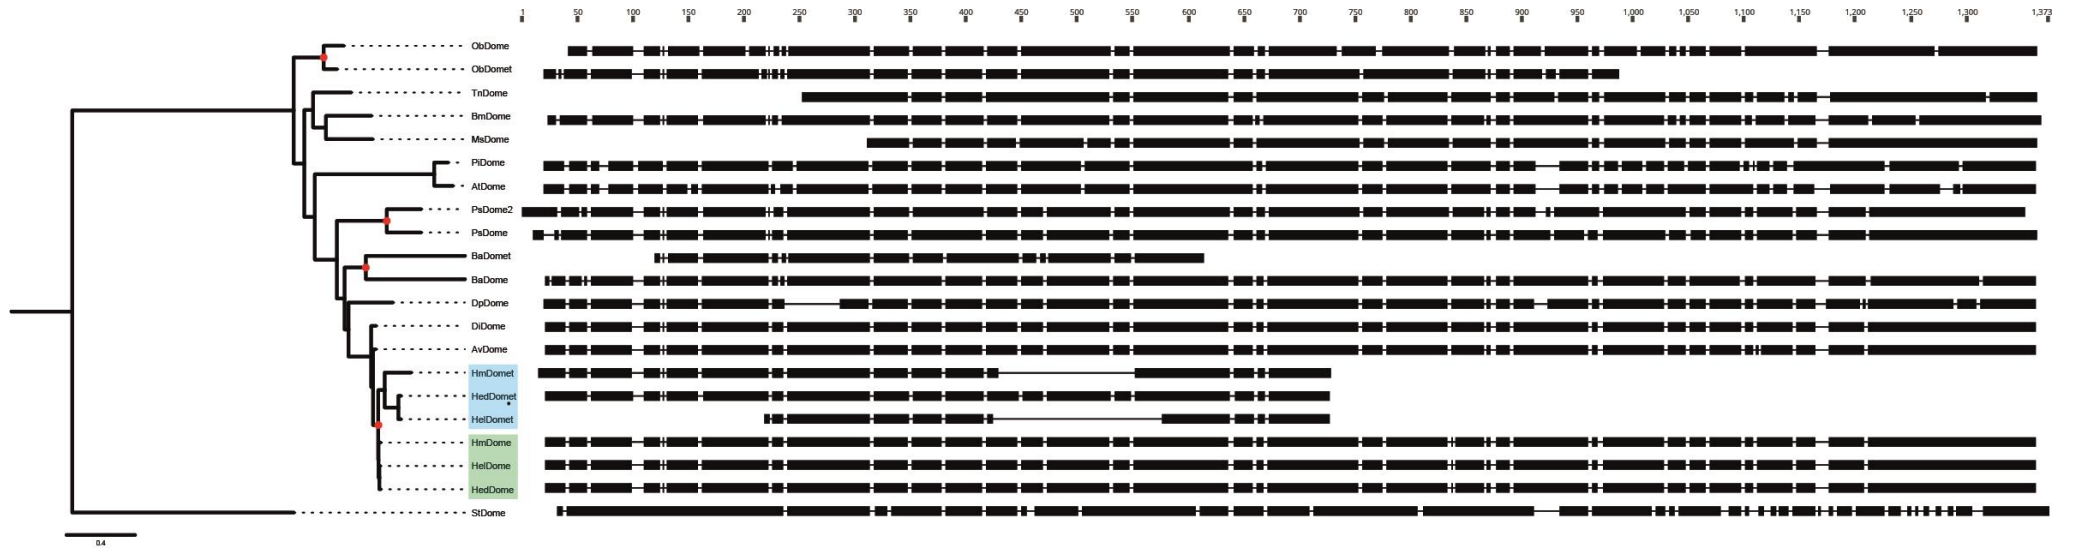

**Figure S1:** Maximum likelihood tree based on lepidopteran *domeless* amino acid sequences. The *Heliconius* duplications are highlighted in blue (*domet*) and green (*dome*). Putative duplication events are shown with a red circle. Protein alignments are shown alongside each species, illustrating several C-terminal truncation events in the duplicated sequences. *H. melpomene* (Hm), *H. erato demophoon* (Hed), *Operophtera brumata* (Ob), *Trichoplusia ni* (Tn), *Bombyx mori* (Bm), *Manduca sexta* (Ms), *Plodia interpunctella* (Pi), *Amyeolis transitella* (At), *Phoebis sennae* (Ps), *Bicyclus anynana* (Ba), *Danaus plexippus* (Dp), *Dryas iulia* (Di), *Agraulis vanillae* (Av), *Heliconius erato lativitta* (Hel). As a trichopteran outgroup we used a recently published Pacbio assembly of *Stenopsyche tienmushanensis* (St) (Luo et al., 2018)
