# Supplementary material for: Cortex cis-regulatory switches establish scale colour identity and pattern diversity in Heliconius
Source: bioRxiv or medRxiv preprint supplement (doi:10.1101/2020.05.26.116533), 2021-03-17
Supplement: Supplementary file [file media-2.pdf]

## ORFs found in TSA transcripts

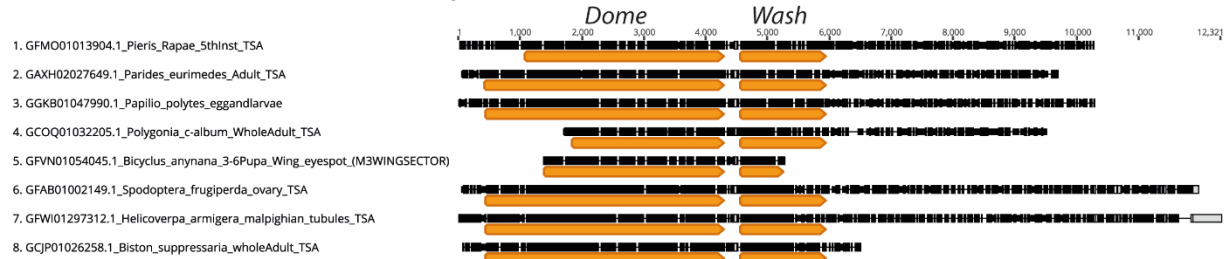

## Washout Alignment

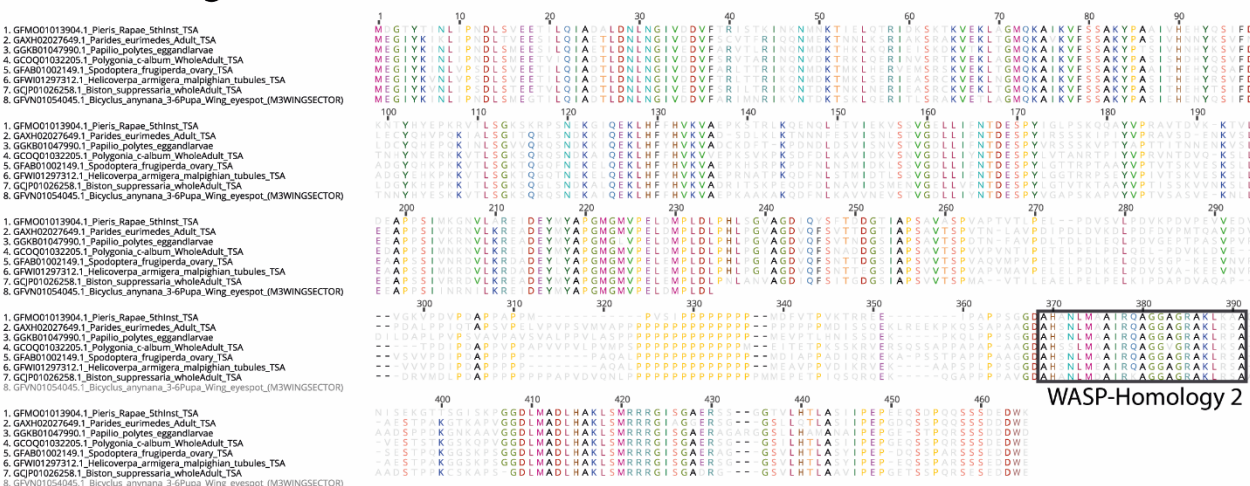

## Domeless Alignment

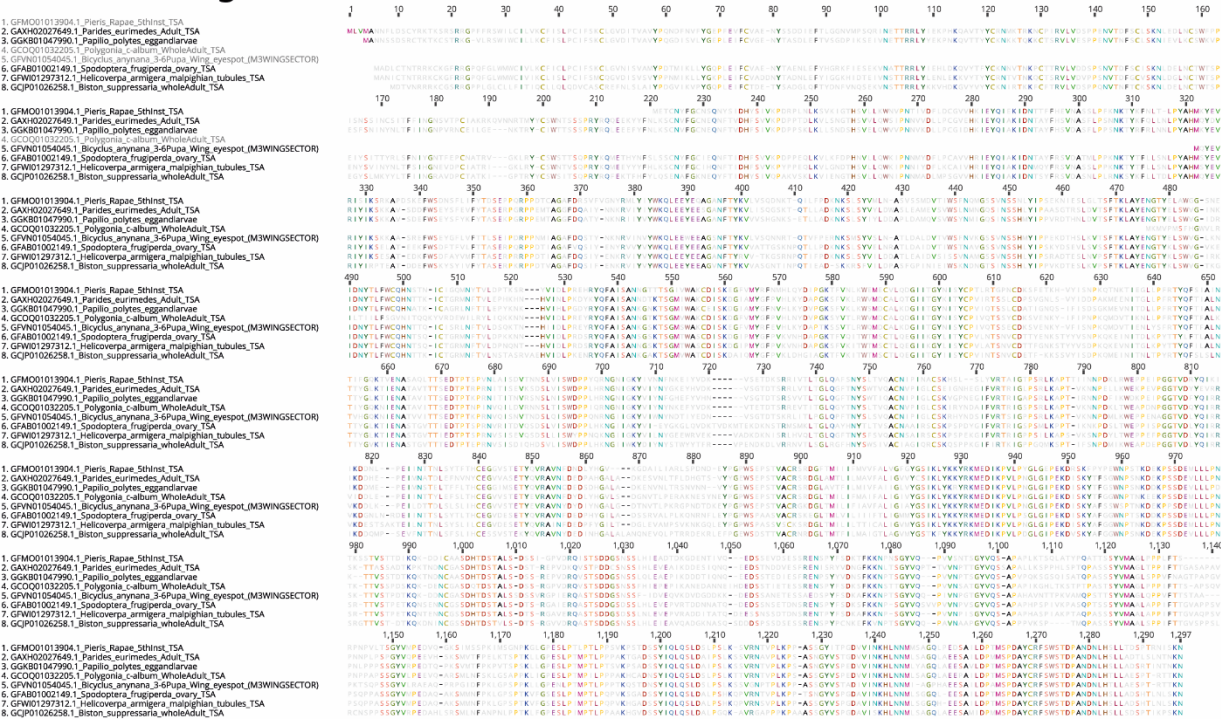

**Figure S2.1:** To examine the conservation of *dome/wash* bi-cistronic transcription in the Lepidoptera we performed BLASTn searches using the previously annotated *dome* transcripts from the *H. melpomene* genome (Hmel2) found on Lepbase (Challi et al., 2016), against the Transcription Shotgun Assembly (TSA) sequence archive on NCBI. We recovered several assembled transcripts containing both the *dome* and *wash* ORFs in various divergent lepidoptera. The positions of *dome* and *wash* ORFs are shown (arrows blocks in TSA transcript) as well as the encoded Wash and Dome proteins below.

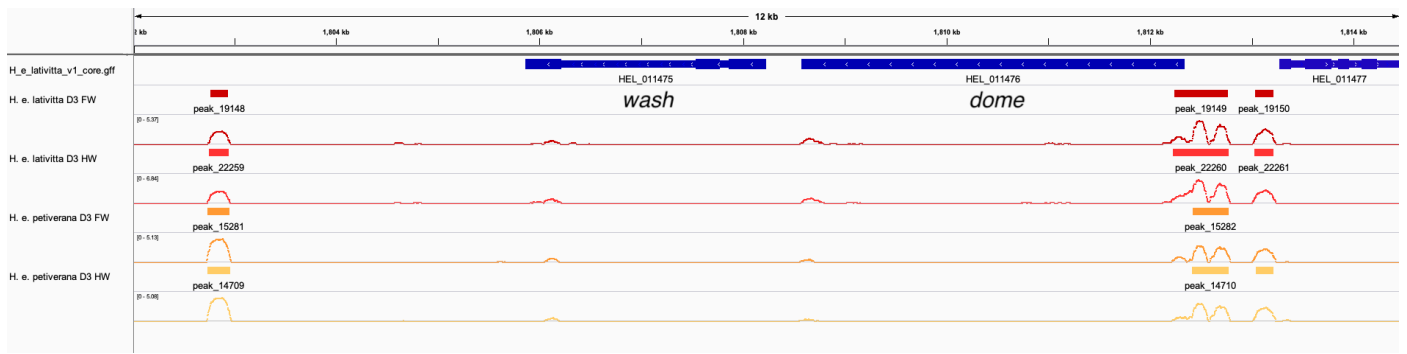

**Figure S2.2:** ATAC-seq analysis supports *dome/wash* bi-cistronic transcription in *Heliconius erato*. We explored whether *dome/wash* share a promoter by analysing published ATAC-seq data from (Lewis *et al*, 2019). We analysed samples corresponding to the forewings and hindwings of day three pupa of *H. e. lativitta* and *H. e. petiverana*. Peaks were called using Genrich (<http://github.com/jsh58/Genrich/>), using the parameter -j (ATAC-seq mode) with a cutoff of  $q < 0.05$  ( $q = \text{FDR adjusted } p\text{-value}$ ). Peaks were visualised in IGV. Coloured blocks correspond to significant peaks and lines represent  $-\log(q)$ . Peaks, indicating *cis*-regulatory activity, were observed upstream of *dome* for all samples whereas no peaks were present upstream of the start of *wash*, indicating a shared promoter for *dome/wash*.
