# Supplementary material for: Cortex cis-regulatory switches establish scale colour identity and pattern diversity in Heliconius
Source: bioRxiv or medRxiv preprint supplement (doi:10.1101/2020.05.26.116533), 2021-03-17
Supplement: Supplementary file [file media-3.pdf]

**Supplementary File 3:** Diagnostic SNP analysis confirms source populations match the RNA-seq samples.

**Table S3.1:** RNAseq samples were genotyped relative to protein coding WGS SNPs from individuals from the source populations in Panama. Both SNPs were contained in the protein coding sequence of the gene *Cortex*. Individuals from the RNAseq experiment match the genotype of the source populations.

| Sequence | Race             | Individual | Informative site, scaffold<br>215006 |         |
|----------|------------------|------------|--------------------------------------|---------|
|          |                  |            | 1207068                              | 1210502 |
| WGS      | <i>melpomene</i> | P3_1       | TT                                   | TT      |
|          |                  | P3_2       | TT                                   | TT      |
|          |                  | P3_3       | TC                                   | TC      |
| WGS      | <i>rosina</i>    | ros10_1    | CC                                   | CC      |
|          |                  | ros10_2    | CC                                   | CC      |
|          |                  | ros10_3    | CC                                   | CC      |
|          |                  | ros10_4    | CC                                   | CC      |
|          |                  | ros10_5    | CC                                   | CC      |
|          |                  | ros10_6    | CC                                   | CC      |
|          |                  | ros10_7    | CC                                   | CC      |
|          |                  | ros10_8    | CC                                   | CC      |
|          |                  | ros10_9    | CC                                   | CC      |
|          |                  | ros10_10   | CC                                   | CC      |
| RNAseq   | <i>melpomene</i> | 49         | TT                                   | TT      |
|          |                  | 52         | TT                                   | TT      |
|          |                  | 54         | TT                                   | TT      |
|          |                  | 55         | TT                                   | TT      |
|          |                  | 56         | TT                                   | TT      |
|          |                  | 61         | TT                                   | TT      |
|          |                  | 62         | TT                                   | TT      |
| RNAseq   | <i>rosina</i>    | 13         | CC                                   | CC      |
|          |                  | 14         | CC                                   | CC      |
|          |                  | 15         | CC                                   | CC      |
|          |                  | 16         | CC                                   | CC      |
|          |                  | 17         | CC                                   | CC      |
|          |                  | 24         | CC                                   | CC      |

**Table S3.2:** This was repeated for the *H. erato* samples; here, only one informative protein-coding SNP was found, in the gene *parn*. Once again, all individuals match the expected genotype.

| <b>Informative site, scaffold 1505</b> |                  |               |         |
|----------------------------------------|------------------|---------------|---------|
| <b>Sequence</b>                        | Race             | Individual    | 2306177 |
| <b>WGS</b>                             | <i>hydara</i>    | STRI_WOM_0039 | AA      |
|                                        |                  | STRI_WOM_0040 | AA      |
|                                        |                  | STRI_WOM_0042 | AA      |
|                                        |                  | STRI_WOM_0088 | AA      |
|                                        |                  | STRI_WOM_5193 | AA      |
|                                        |                  | STRI_WOM_5351 | AA      |
| <b>WGS</b>                             | <i>demophoon</i> | Pet_ED3       | GG      |
|                                        |                  | Pet_ED4       | GG      |
|                                        |                  | Pet_ED5       | GG      |
|                                        |                  | Pet_ED6       | GG      |
|                                        |                  | STRI_WOM_0033 | GG      |
|                                        |                  | STRI_WOM_0082 | GG      |
|                                        |                  | STRI_WOM_0087 | GG      |
|                                        |                  | STRIWOM1284   | GG      |
|                                        |                  | STRIWOM5353   | GG      |
|                                        |                  | STRIWOM5362   | GG      |
| <b>RNAseq</b>                          | <i>hydara</i>    | 17            | AA      |
|                                        |                  | 25            | AA      |
|                                        |                  | 33            | AA      |
|                                        |                  | 34            | AA      |
|                                        |                  | 36            | AA      |
| <b>RNAseq</b>                          | <i>demophoon</i> | A4            | GG      |
|                                        |                  | D2            | GG      |
|                                        |                  | D6            | GG      |
|                                        |                  | D9            | GG      |
|                                        |                  | C6            | GG      |
|                                        |                  | H3            | GG      |
|                                        |                  | A4            | GG      |
