# Supplementary material for: Cortex cis-regulatory switches establish scale colour identity and pattern diversity in Heliconius
Source: bioRxiv or medRxiv preprint supplement (doi:10.1101/2020.05.26.116533), 2021-03-17
Supplement: Supplementary file [file media-4.pdf]

**Supplementary File 4:** DGE analysis show *cortex* and *dome/wash* are consistently differentially expressed between colour pattern races and pupal wing sections.

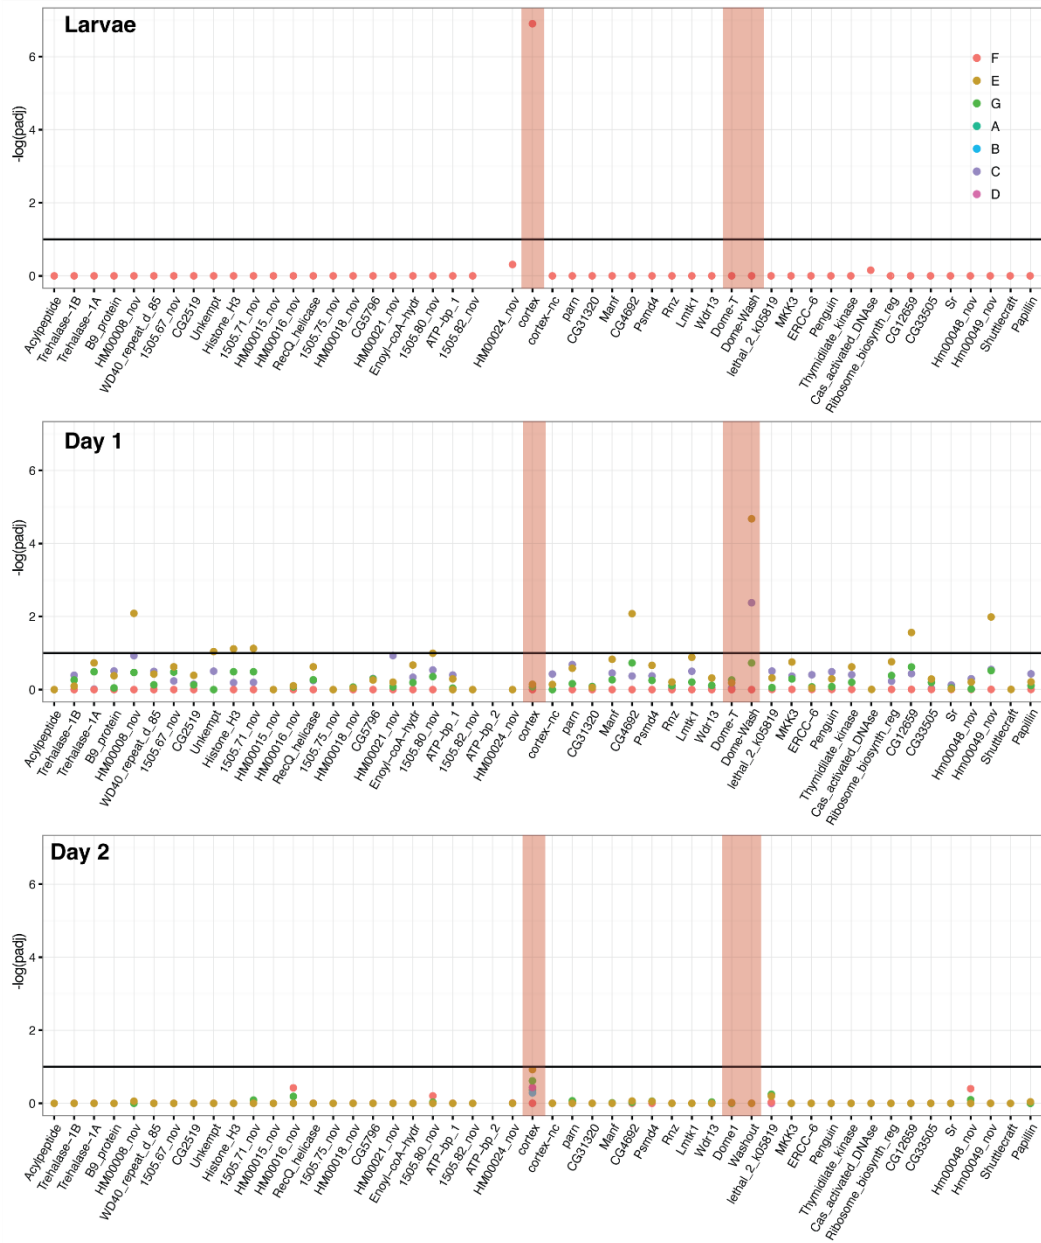

**Figure S4.1:** Differential expression across the *cortex* locus in *H. erato*, shown as the negative log of the adjusted p value ( $-\log(\text{padj})$ ). Top: larvae, middle: day 1 pupae, bottom, day 2 pupae. See below table for gene IDs and homology with *H. melpomene*. The red shading highlights the genes *cortex*, *dome-T* and *Dome-Wash*. The horizontal line indicates the cutoff for significance, at  $\text{padj}=0.1$ . Colours are used for each of the contrasts, depicted in Figure 3. In this analysis, genes were differentially expressed in contrast E and C (depictions of these contrasts are provided). E gives genes differentially regulated in black posterior compartment, and C gives genes differentially regulated in yellow anterior compartment.

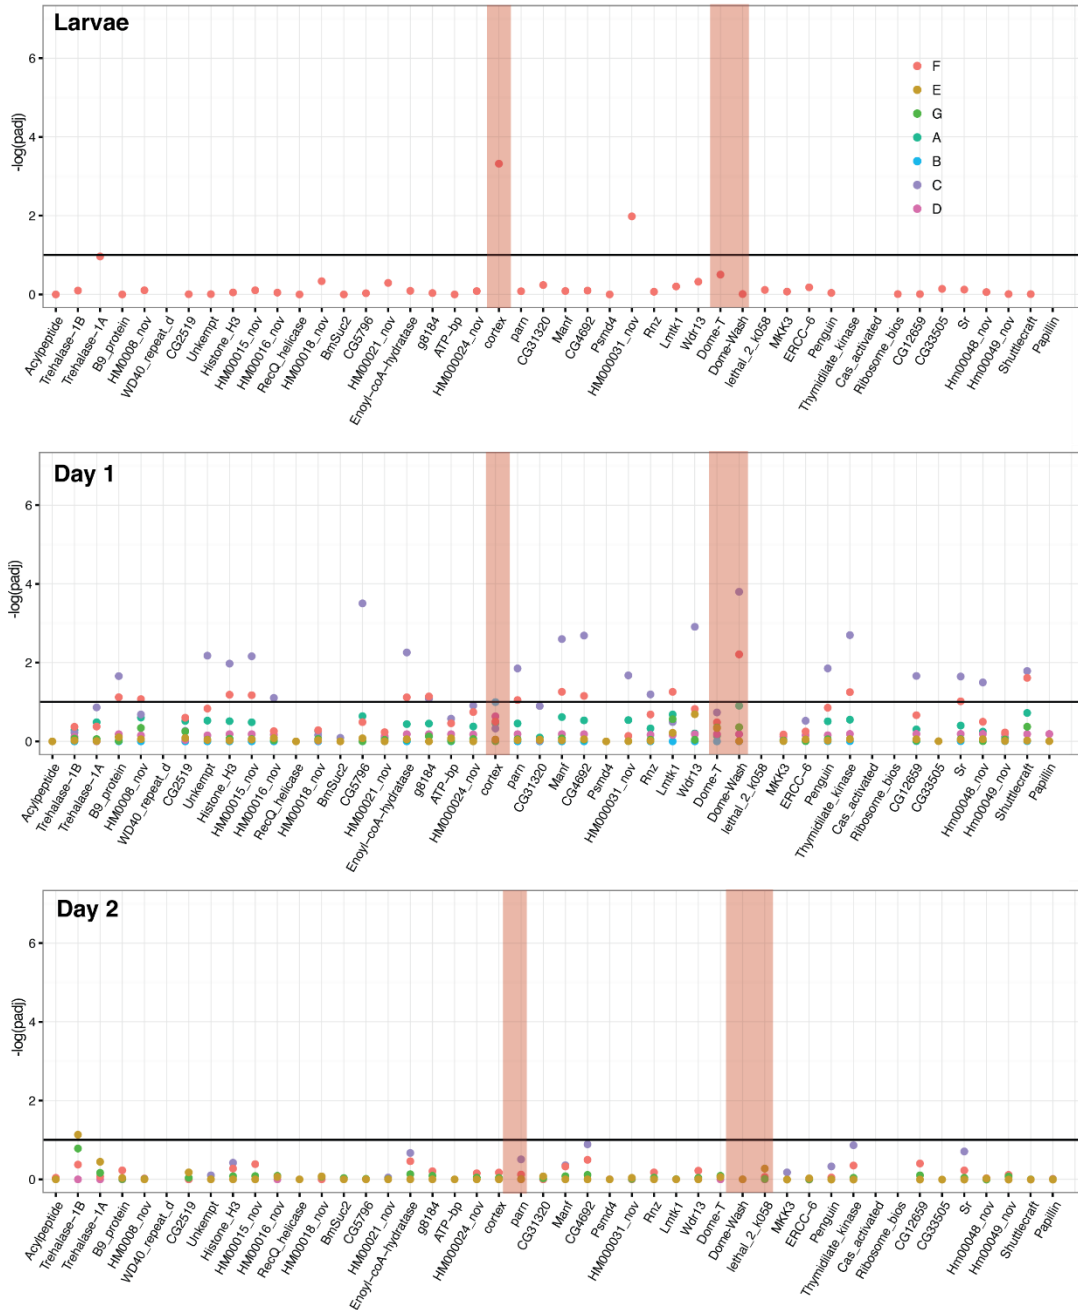

**Figure S4.2.** Differential expression across the *cortex* locus in *H. melpomene*, shown as the negative log of the adjusted p value ( $-\log(\text{padj})$ ). Top: larvae, middle: day 1 pupae, bottom, day 2 pupae. See below table for gene IDs and homology with *H. erato*. Red bars highlight the genes *cortex*, *Dome-T* and *Dome-Wash*. The horizontal line indicates the cutoff for significance, at  $\text{padj}=0.1$ . Colours are used for each of the contrasts, depicted in Figure S4.3. In this analysis, genes were differentially expressed in contrast E, C and F (depictions of these contrasts are provided). F is the difference between races, E gives genes differentially regulated in black posterior compartment, and C gives genes differentially regulated in yellow anterior compartment (these contrasts are depicted in cartoon form).

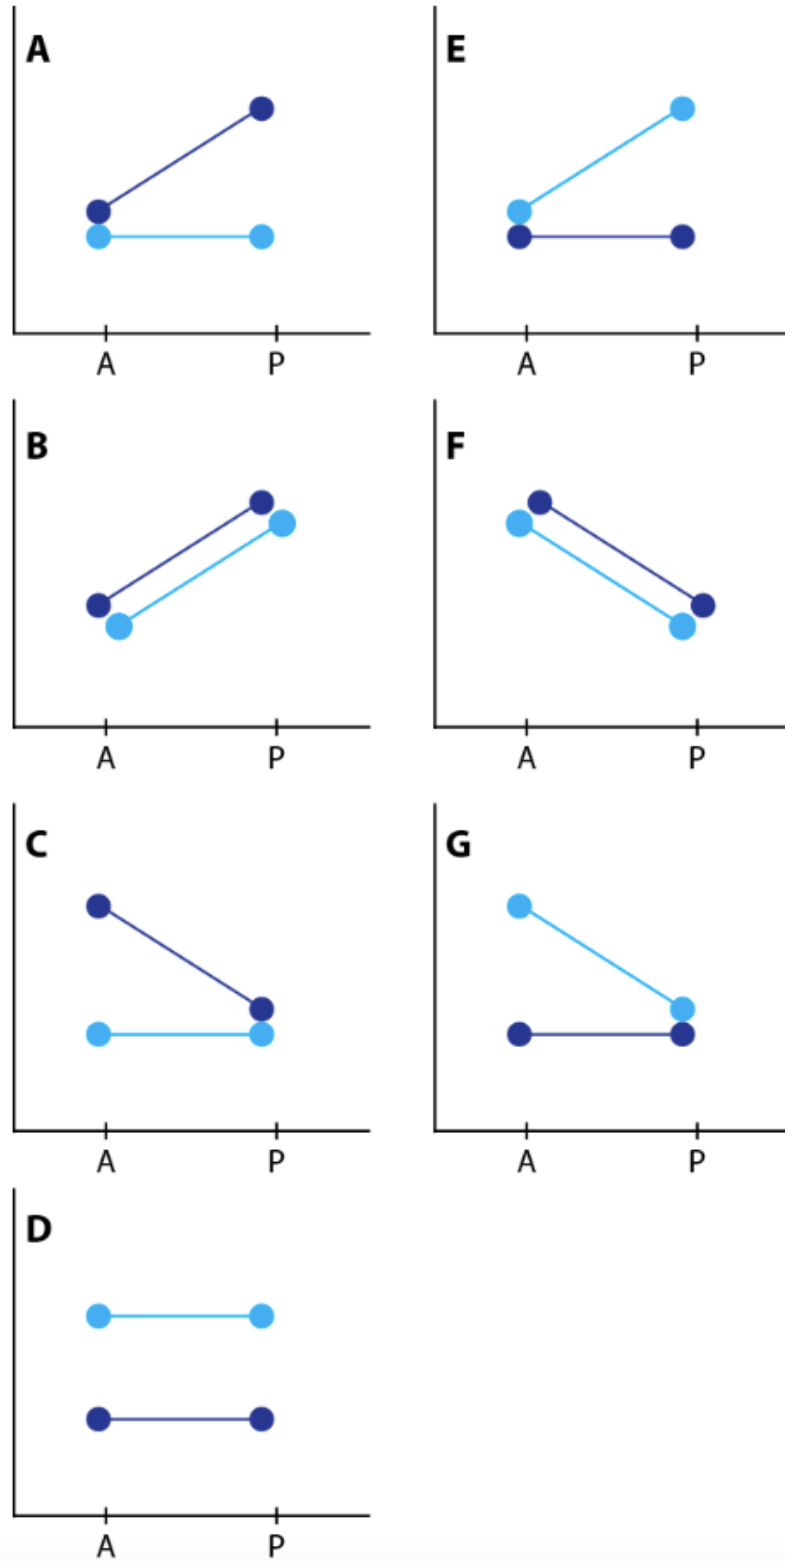

**Figure S4.3:** Depiction of contrasts. Dark blue represents the yellow races, *H. m. rosina* and *H. e. demopoon* from Panama. Light blue represents the black races, *H. m. melpomene* and *H. e. hydara* from Colombia.

**Table S4.1:** Gene IDs in the *H. melpomene* Yb locus and their corresponding IDs in the *H. erato* genome.

| Hera1 Gene ID             | gene name / description | Hmel2 Gene ID |
|---------------------------|-------------------------|---------------|
| evm.model.Herato1505.61   | Acylpeptide             | HMEL000003    |
| evm.model.Herato1505.62   | Trehalase-1B            | HMEL000004    |
| evm.model.Herato1505.63   | Trehalase-1A            | HMEL000006    |
| evm.model.Herato1505.64   | B9_protein              | HMEL000007    |
| evm.model.Herato1505.65   | HM0008_nov              | HMEL000008    |
| evm.model.Herato1505.66   | WD40_repeat_d_85        | HMEL000010    |
| evm.model.Herato1505.67   |                         |               |
| evm.model.Herato1505.68   | CG2519                  | HMEL000012    |
| evm.model.Herato1505.69   | Unkempt                 | HMEL000013    |
| evm.model.Herato1505.70   | Histone_H3              | HMEL000014    |
| evm.model.Herato1505.71   |                         |               |
| evm.model.Herato1505.72   | HM00015_nov             | HMEL000015    |
| evm.model.Herato1505.73   | HM00016_nov             | HMEL000016    |
| evm.model.Herato1505.74   | RecQ_helicase           | HMEL000017    |
| evm.model.Herato1505.75   |                         |               |
| evm.model.Herato1505.76   | HM00018_nov             | HMEL000018    |
| *** <b>(1505.35!)</b> *** | BmSuc2                  | HMEL000019    |
| evm.model.Herato1505.77   | CG5796                  | HMEL000020    |
| evm.model.Herato1505.78   | HM00021_nov             | HMEL000021    |
| evm.model.Herato1505.79   | Enoyl-coA-hydratase     | HMEL000022    |
| evm.model.Herato1505.80   |                         |               |
| evm.model.Herato1505.81   | ATP-bp                  | HMEL002023    |
| evm.model.Herato1505.82   |                         |               |
| evm.model.Herato1505.83   | HMEL002023              |               |
| evm.model.Herato1505.84   | HM00024_nov             | HM00024_nov   |
|                           |                         | g8186         |
| evm.model.Herato1505.85   | Cortex                  | HMEL000025    |
| evm.model.Herato1505.86   | parn                    | HMEL000026    |
| evm.model.Herato1505.87   | CG31320                 | HMEL000027    |
| evm.model.Herato1505.88   | Manf                    | HMEL000028    |
| evm.model.Herato1505.89   | CG4692                  | HMEL000029    |
| evm.model.Herato1505.90   | Psm4                    | HMEL000030    |
|                           | HM000031_nov            | HMEL000031    |
| evm.model.Herato1505.91   | Rnz                     | HMEL000032    |
| evm.model.Herato1505.92   | Lmtk1                   | HMEL000033    |
| evm.model.Herato1505.93   | Wdr13                   | g8202         |
| evm.model.Herato1505.94   | Dome1                   | HMEL013472    |
| evm.model.Herato1505.95   | Washout                 | HMEL000036    |
| evm.model.Herato1505.96   | Dome2                   | HMEL000037    |
| evm.model.Herato1505.97   | lethal_2_k05819         | g8206         |
| evm.model.Herato1505.98   | MKK3                    | HMEL000039    |

|                          |                     |            |
|--------------------------|---------------------|------------|
| evm.model.Herato1505.99  | ERCC-6              | HMEL000040 |
| evm.model.Herato1505.100 | Penguin             | HMEL000041 |
| evm.model.Herato1505.101 | Thymidilate_kinase  | HMEL000042 |
| evm.model.Herato1505.102 | Cas_activated_DNAse | HMEL000043 |
| evm.model.Herato1505.103 | Ribosome_biosynth_r | HMEL000044 |
| evm.model.Herato1505.104 | CG12659             | HMEL000045 |
| evm.model.Herato1505.105 | CG33505             | HMEL000046 |
| evm.model.Herato1505.106 | Sr                  | HMEL000047 |
| evm.model.Herato1505.107 | Hm00048_nov         | HMEL000048 |
| evm.model.Herato1505.108 | Hm00049_nov         | HMEL000049 |
| evm.model.Herato1505.109 |                     | HMEL000050 |
|                          | Papillin            | HMEL000051 |
| evm.model.Herato1505.110 | HM000052_nov        | HMEL000052 |
