# Supplementary material for: Cortex cis-regulatory switches establish scale colour identity and pattern diversity in Heliconius
Source: bioRxiv or medRxiv preprint supplement (doi:10.1101/2020.05.26.116533), 2021-03-17
Supplement: Supplementary file [file media-6.pdf]

**Supplementary File 6: CRISPR mutagenesis confirmed through sanger sequencing**

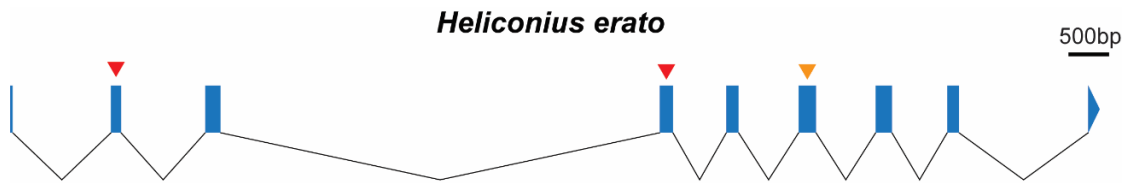

**Exon 2**

```

WT  TTTAACACGCAACGTAATCGCCTAGATAGGTTCGTAGCGCCCCGAGATTCCCTTCAGCGAAACGCG
D1  TTTAACACGCAACGTAATCGCCTAG ----GTTTCGTAGCGCCCCGAGATTCCCTTCAGCGAAACGCG
D2  TTTAACACGCAACGTAATCGCCTAG -----TTCGTAGCGCCCCGAGATTCCCTTCAGCGAAACGCG
D3  TTTAACACGCAACGTAATCGCCTAG -----CCGAGATTCCCTTCAGCGAAACGCG
I1  TTTAACACGCAACGTAATCGCCTAGATAGGTTCGTAGCGCCCCGAGATTCCCTTCAGCGAAACGCG
      ▲
      ATTTCGC
    
```

**Exon 4**

```

WT  CAGCGTATCCTTGGCTTATGAGACTCTGGCTCCTCCAACTCCATTTATGGTAGTTTCTCCCAAGT
D1  CAGCGTATCCTTGGCTTATGAGACTC-----TTATGGTAGTTCCTCCCAAGT
D2  CAGCGTATCCTTG-----TTATGGTAGTTCCTCCCAAGT
D3  CAGCGTATCCTTGGCTTATGAGACTCTGGCTCCTCCAACTCC---ATGGTAGTTCCTCCCAAGT
D4  CAGCGTATCCTTGGCTTATGAGACTC-----ATGGTAGTTCCTCCCAAGT
    
```

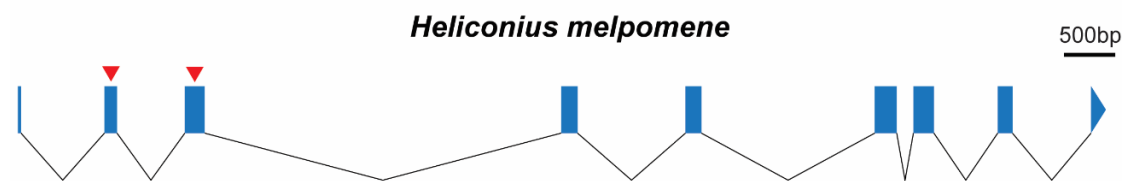

**Exon 2**

```

WT  GCCAAGAGCGACGTCGGCGCGTTCGCTGAAAGAATCTCGGGTCGCTACGAACCTATCTAGGCG
D1  GCCAAGAGCGACGTCGCGGTTTCGCTGAAAGA -----TCGCTACGAACCTATCTAGGCG
D2  GCCAAGAGCGACGTCGGCGCGTTCGCTGAAA----CTCGGGTCCCTACGAACCTATCTAGGCG
D3  GCCAAGAGCGA-----TCGCTACGAACCTATCTAGGCG
D4  GCC-----TCGGGTCGCTACGAACCTATCTAGGCG
    
```

**Exon 3**

```

WT  GGTCCAGAATGCTGTCTGCTGAGGAAAGGTAGGTTTTTTTTCTCGGAATACATGGCCACAGTTGAT
D1  GGTCCAGGATGCTGTCTTGAAG-----AGTTGAT
D2  GGTCCAGAATGCTG-----AGGAAAGGTAGGTTTTTTTTCTCGGAATACATGGCCACAGTTGAT
    
```

**Figure S6:** Gene models for cortex are shown for both *H. erato* and *H. melpomene*. Red arrows indicate positions of sgRNAs that were genotyped in CRISPR experiments. Recovered sequences showing evidence of editing as a result of CRISPR mutagenesis are shown. Target sequences are shown in blue and PAM site highlighted in bold. For *H. erato* exon 2, we recovered a sequence containing a 7bp insertion (indicated with red arrowhead, I2).
