# Supplementary material for: Cortex cis-regulatory switches establish scale colour identity and pattern diversity in Heliconius
Source: bioRxiv or medRxiv preprint supplement (doi:10.1101/2020.05.26.116533), 2021-03-17
Supplement: Supplementary file [file media-7.pdf]

Supplementary File 7: CRISPR injection experiments and genotyping primers.

Table S7.1: CRISPR experiments and guides used per species/morph.

| Species                      | sgRNAs                                                    | Final concentration ng/μl [sgRNA1(:sgRNAs):Cas9] |
|------------------------------|-----------------------------------------------------------|--------------------------------------------------|
| <i>H. erato demophoon</i>    | Hera_Cort_gRNA_E2 , Hera_Cort_gRNA_E4 , Hera_Cort_gRNA_E6 | 100:(100):(100):300                              |
|                              | Hera_Cort_gRNA_E2 , Hera_Cort_gRNA_E4                     | 250:(250):500                                    |
|                              | Hera_Cort_gRNA_E2                                         | 500:500                                          |
|                              | Hera_Cort_gRNA_E4                                         | 500:500                                          |
|                              | Hera_Cort_gRNA_E6                                         | 500:500                                          |
| <i>H. erato cyrbia</i>       | Hera_Cort_gRNA_E2 , Hera_Cort_gRNA_E4 , Hera_Cort_gRNA_E6 | 100:(100):(100):300                              |
|                              | Hera_Cort_gRNA_E2 , Hera_Cort_gRNA_E4                     | 250:(250):500                                    |
|                              | Hera_Cort_gRNA_E2                                         | 500:500                                          |
|                              | Hera_Cort_gRNA_E4                                         | 500:500                                          |
|                              | Hera_Cort_gRNA_E6                                         | 500:500                                          |
| <i>H. erato hydra</i>        | Hera_Cort_gRNA_E2 , Hera_Cort_gRNA_E4                     | 250:(250):500                                    |
|                              | Hera_Cort_gRNA_E2                                         | 500:500                                          |
|                              | Hera_Cort_gRNA_E4                                         | 500:500                                          |
|                              | Hera_Cort_gRNA_E6                                         | 500:500                                          |
| <i>H. charitonia</i>         | Hera_Cort_gRNA_E2 , Hera_Cort_gRNA_E4                     | 500:500                                          |
|                              | Hera_Cort_gRNA_E6                                         | 500:500                                          |
| <i>H. melpomene rosina</i>   | Hmel_Cort_gRNA_E2, Hmel_Cort_gRNA_E3                      | 250:(250):500                                    |
|                              | Hmel_Cort_gRNA_E2                                         | 500:500                                          |
|                              | Hmel_Cort_gRNA_E3                                         | 500:500                                          |
| <i>H. melpomene plesseni</i> | Hmel_Cort_gRNA_E2, Hmel_Cort_gRNA_E3                      | 250:(250):500                                    |
|                              | Hmel_Cort_gRNA_E2                                         | 500:500                                          |
|                              | Hmel_Cort_gRNA_E3                                         | 500:500                                          |
| <i>H. melpomene cythera</i>  | Hmel_Cort_gRNA_E2, Hmel_Cort_gRNA_E3                      | 250:(250):500                                    |
| <i>H. hecale melicerta</i>   | Hmel_Cort_gRNA_E2                                         | 250:(250):500                                    |
|                              | Hmel_Cort_gRNA_E3                                         | 500:500                                          |

| Time of collection (hours) | Number eggs injected | Number Hatched | Number Puape | Number of Adults | Hatched to Adult Ratio |
|----------------------------|----------------------|----------------|--------------|------------------|------------------------|
| 2-4 hrs                    | 360                  | 135            | 56           | 43               | 11.94444444            |
| 1-3 hrs                    | 206                  | 73             | 45           | 37               | 17.96116505            |
| 2-4 hrs                    | 134                  | 42             | 21           | 16               | 11.94029851            |
| 2-4 hrs                    | 111                  | 46             | 19           | 17               | 15.31531532            |
| 2-3 hrs                    | 123                  | 26             | 17           | 10               | 8.130081301            |
| 2-4 hrs                    | 236                  | 98             | 53           | 43               | 18.22033898            |
| 1-3 hrs                    | 622                  | 180            | 97           | 61               | 9.807073955            |
| 1-3 hrs                    | 114                  | 36             | 18           | 13               | 11.40350877            |
| 1-4 hrs                    | 221                  | 81             | 40           | 24               | 10.85972851            |
| 2-3 hrs                    | 288                  | 71             | 31           | 26               | 9.027777778            |
| 1-4 hrs                    | 515                  | 191            | 86           | 46               | 8.932038835            |
| 1-3hrs                     | 63                   | 14             | 8            | 6                | 9.523809524            |
| 1-3hrs                     | 61                   | 23             | 13           | 9                | 14.75409836            |
| 1-4 hrs                    | 68                   | 13             | 7            | 6                | 8.823529412            |
| 2-4hrs                     | 120                  | 84             | 21           | 15               | 12.5                   |
| 2-4hrs                     | 109                  | 61             | 40           | 34               | 31.19266055            |
| 1-3hrs                     | 181                  | 56             | 43           | 39               | 21.54696133            |
| 1-3hrs                     | 98                   | 41             | 19           | 12               | 12.24489796            |
| 1-4hrs                     | 55                   | 30             | 18           | 12               | 21.81818182            |
| 1-3hrs                     | 87                   | 56             | 14           | 9                | 10.34482759            |
| 1-4hrs                     | 124                  | 93             | 48           | 37               | 29.83870968            |
| 1-3hrs                     | 86                   | 37             | 30           | 21               | 24.41860465            |
| 1-3hrs                     | 151                  | 64             | 23           | 16               | 10.59602649            |
| 1-3hrs                     | 104                  | 51             | 21           | 14               | 13.46153846            |
| 1-2hrs                     | 56                   | 32             | 15           | 11               | 19.64285714            |

| Number of adults with phenotype | Wing mutant phenotype ratio from hatched eggs | Wing mutant phenotype ratio from emerged adults |
|---------------------------------|-----------------------------------------------|-------------------------------------------------|
| 1                               | 0.30%                                         | 2.30%                                           |
| 5                               | 2.40%                                         | 13.50%                                          |
| 0                               | 0                                             | 0                                               |
| 0                               | 0                                             | 0                                               |
| 0                               | 0                                             | 0                                               |
| 1                               | 0.42%                                         | 2.32%                                           |
| 9                               | 1.45%                                         | 14.80%                                          |
| 0                               | 0                                             | 0                                               |
| 0                               | 0                                             | 0                                               |
| 0                               | 0                                             | 0                                               |
| 3                               | 0.58%                                         | 6.50%                                           |
| 0                               | 0                                             | 0                                               |
| 0                               | 0                                             | 0                                               |
| 0                               | 0                                             | 0                                               |
| 2                               | 1.67%                                         | 13.33%                                          |
| 0                               | 0                                             | 0                                               |
| 1                               | 0.56%                                         | 2.56%                                           |
| 0                               | 0                                             | 0                                               |
| 1                               | 1.81%                                         | 8.30%                                           |
| 1                               | 1.80%                                         | 11.11%                                          |
| 2                               | 1.60%                                         | 5.41%                                           |
| 0                               | 0.00%                                         | 0.00%                                           |
| 2                               | 1.32%                                         | 12.50%                                          |
| 5                               | 4.81%                                         | 35.70%                                          |
| 1                               | 1.79%                                         | 9.09%                                           |

**Table S7.2: Sequences for guides yielding succesful phenotypes and associated genotyping primers**

| <b>Species</b>              | <b>sgRNA Name</b> | <b>Target Sequence (5' &gt; 3')</b> | <b>Genotyping Primers (5' &gt; 3')</b>               |
|-----------------------------|-------------------|-------------------------------------|------------------------------------------------------|
| <i>Heliconius erato</i>     | Hera_Cort_gRNA_E2 | GGGGCGCTACGAACCTATCTAGG             | ATGATATTGAGTTTTGCTAAATCAAGCC<br>GAGTGGCGGAATTCAACGCC |
|                             | Hera_Cort_gRNA_E4 | GGCTCCTCCAACCTCCATTATGG             | CGAGTAAAAGTTCTCCTCTGGG<br>CGTGTTGGTGGCRGCACTTG       |
|                             | Hera_Cort_gRNA_E6 | CCAGCAGTATCGCTTCTCTCACA             | -                                                    |
| <i>Heliconius melpomene</i> | Hmel_Cort_gRNA_E2 | GCGTTTCGCTGAAAGAATCTCGGG            | TGTACATCAAAGGCCGCATG<br>CCTCCGTTTCCCACTTTTCG         |
|                             | Hmel_Cort_gRNA_E3 | GGTCCAGAATGCTGTCTGCTGAGG            | TTGCGTAGCTGTATGTAGGCA<br>AAGCCTTCGATCTGGAGTCA        |
