# Supplementary material for: Cortex cis-regulatory switches establish scale colour identity and pattern diversity in Heliconius
Source: bioRxiv or medRxiv preprint supplement (doi:10.1101/2020.05.26.116533), 2021-03-17
Supplement: Supplementary file [file media-8.pdf]

**Supplementary File 8:** Mutant panels showing replicates of *cortex* mutants for each species/race.

*H. erato cyrbia* - WT

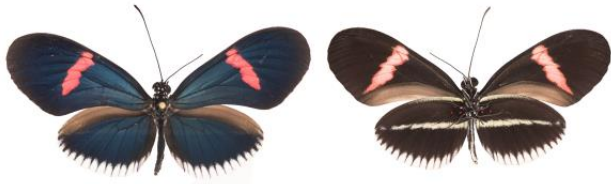

*H. erato cyrbia* - Cort CRISPR

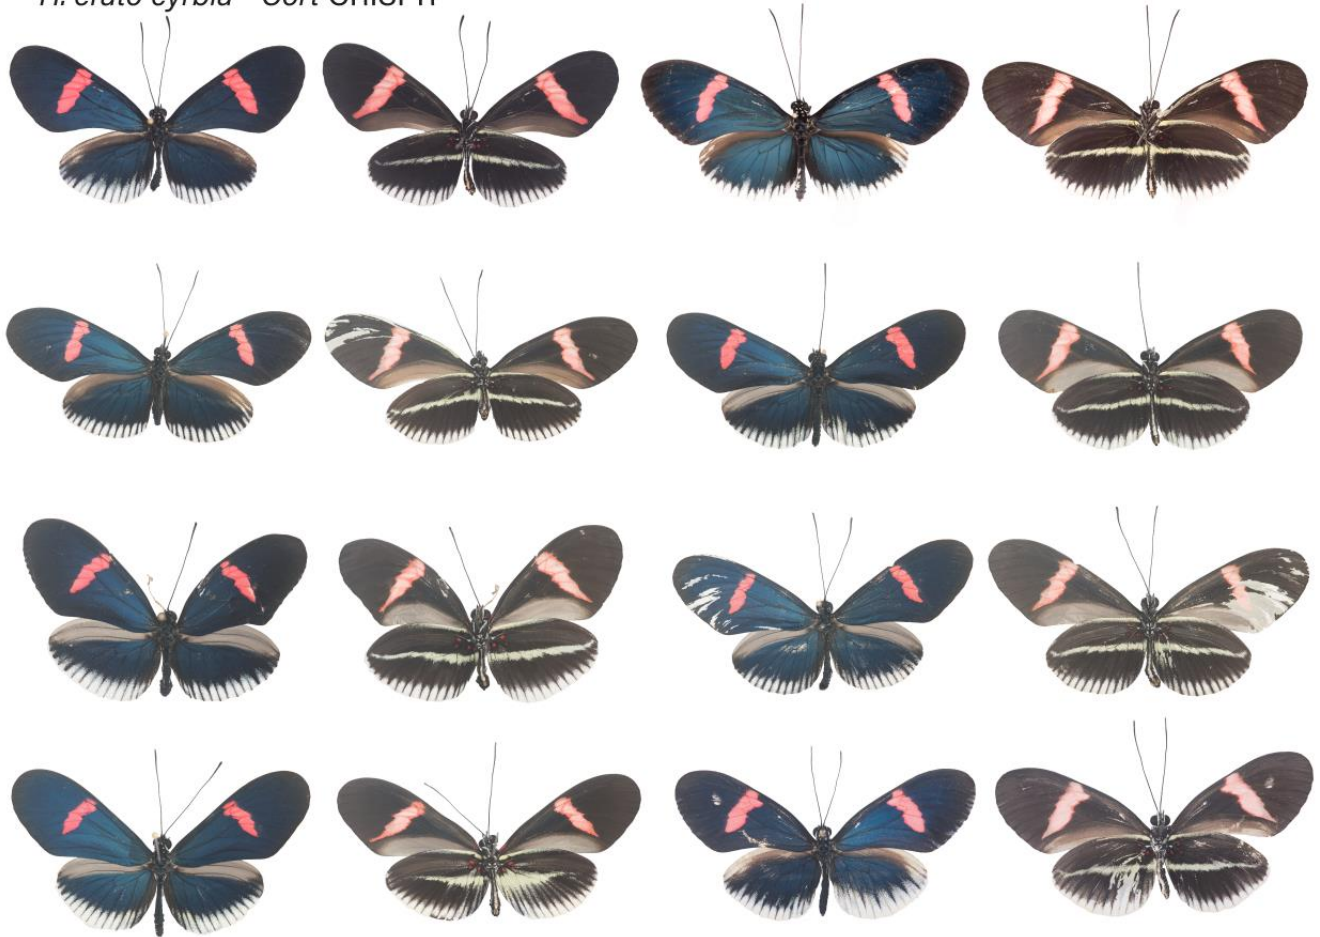

**Figure S8.1:** *H. erato cyrbia* wild-type (WT), alongside *cortex* mKO individuals recovered in CRISPR experiments. Dorsal and ventral sides shown for each mutant.

*H. erato demophoon* - WT

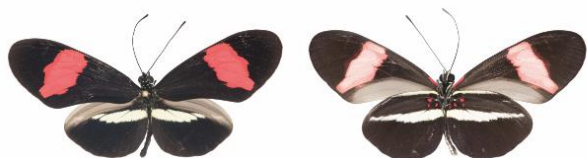

*H. erato demophoon* - *Cort* CRISPR

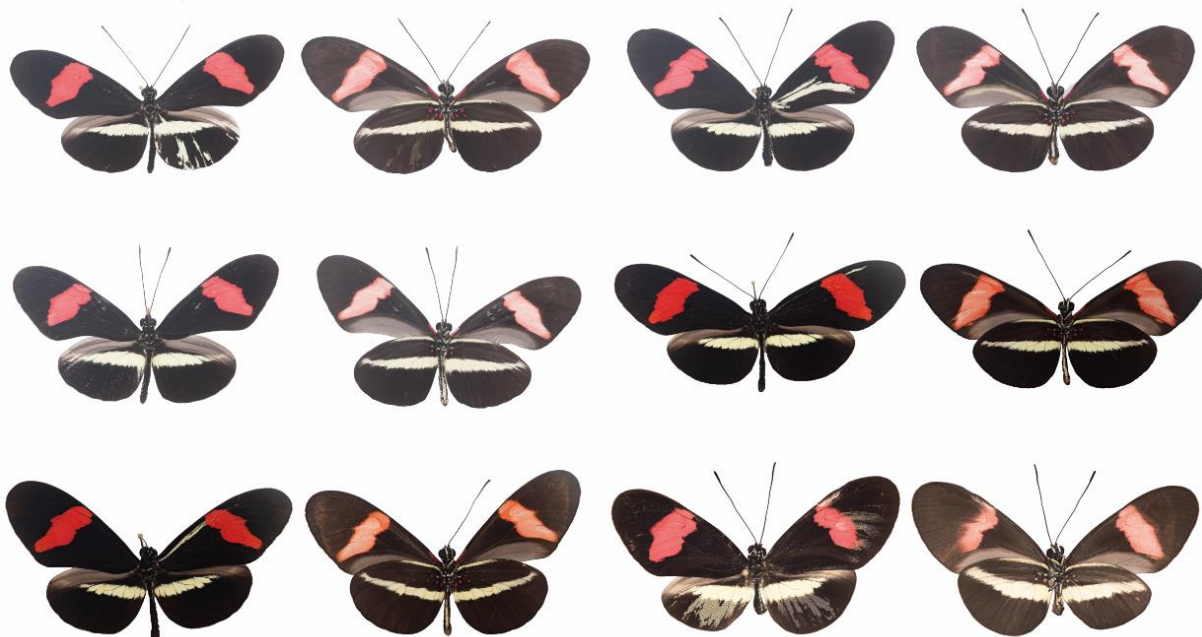

**Figure S8.2:** *H. erato demophoon* wild-type (WT), alongside *cortex* mKO individuals recovered in CRISPR experiments. Dorsal and ventral sides shown for each mutant.

*H. erato hydara* - WT

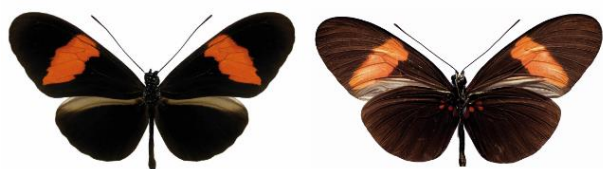

*H. erato hydara* - *Cort* CRISPR

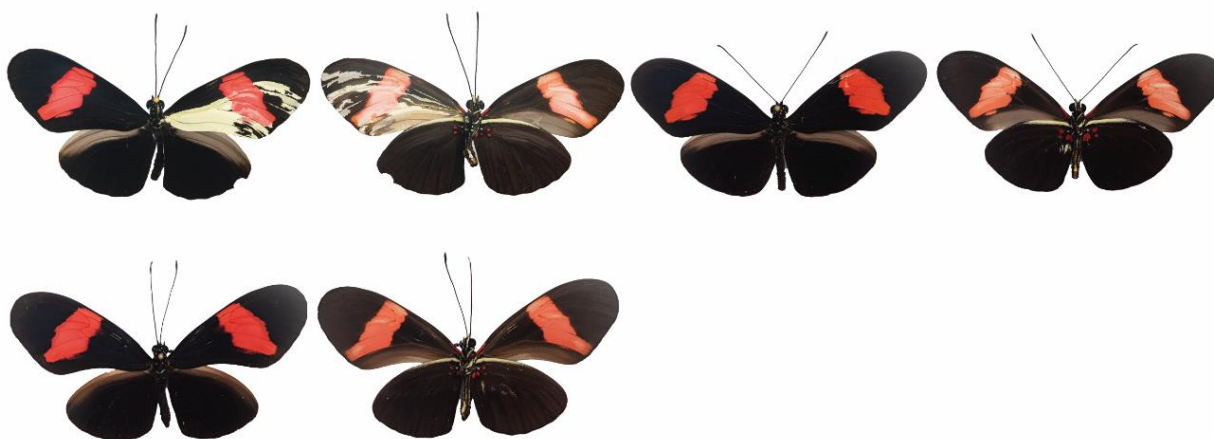

**Figure S8.3:** *H. erato hydara* wild-type (WT), alongside *cortex* mKO individuals recovered in CRISPR experiments. Dorsal and ventral sides shown for each mutant.

*H. melpomene plesseni* - WT

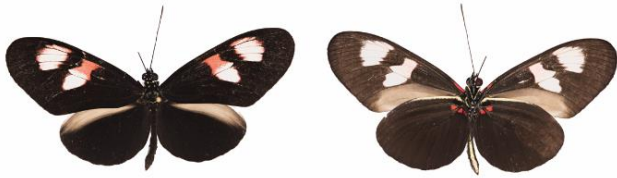

*H. melpomene plesseni* - Cort CRISPR

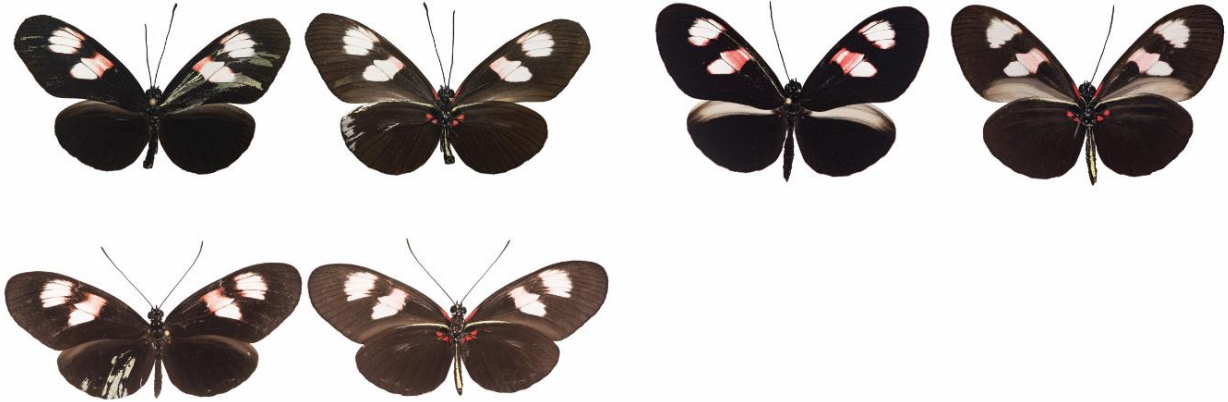

**Figure S8.4:** *H. melpomene plesseni* wild-type (WT), alongside *cortex* mKO individuals recovered in CRISPR experiments. Dorsal and ventral sides shown for each mutant.

*H. melpomene cythera* - WT

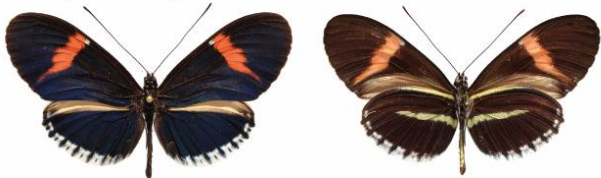

*H. melpomene cythera* - Cort CRISPR

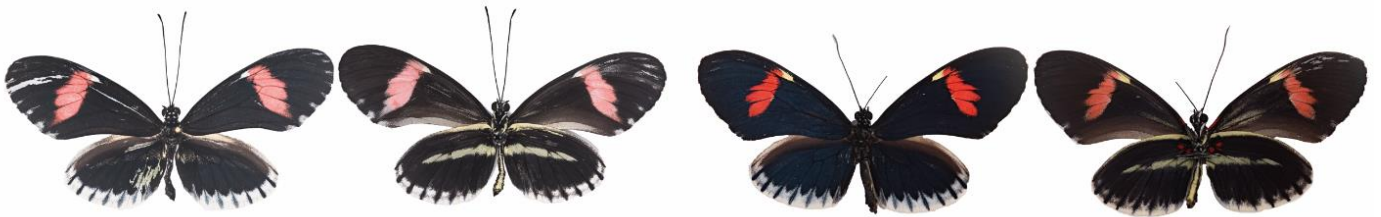

**Figure S8.5:** *H. melpomene cythera* wild-type (WT), alongside *cortex* mKO individuals recovered in CRISPR experiments. Dorsal and ventral sides shown for each mutant.

*H. hecale melicerta* - WT

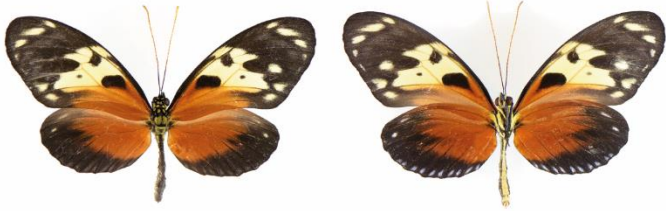

*H. hecale melicerta* - Cort CRISPR

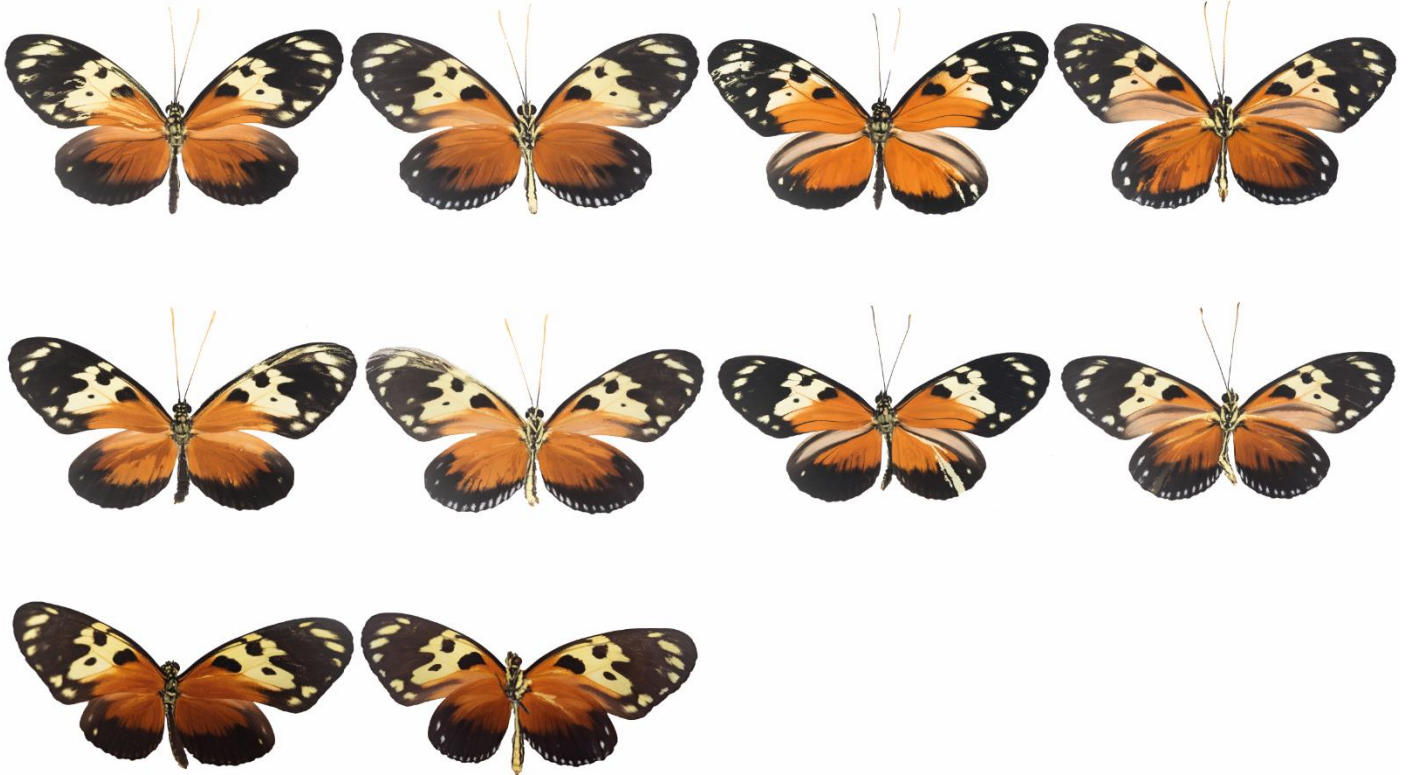

**Figure S8.6:** *H. hecale melicerta* wild-type (WT), alongside *cortex* mKO individuals recovered in CRISPR experiments. Dorsal and ventral sides shown for each mutant.

*H. charitonia* - WT

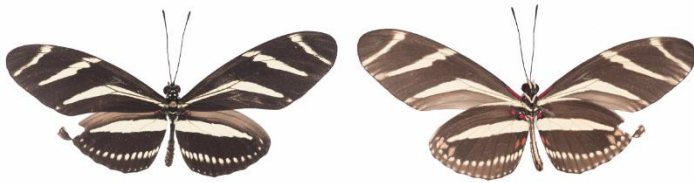

*H. charitonia* - Cort CRISPR

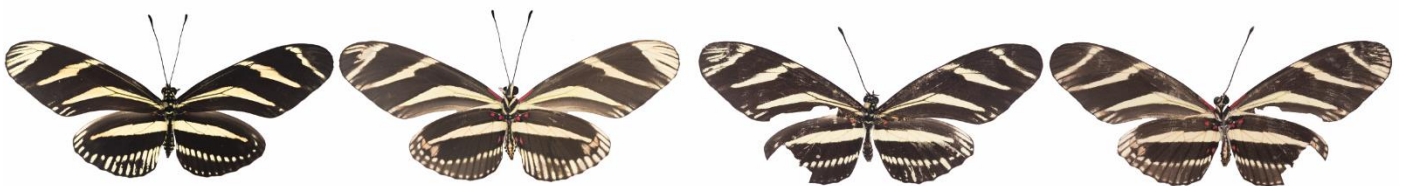

**Figure S8.7:** *H. charitonia* wild-type (WT), alongside *cortex* mKO individuals recovered in CRISPR experiments. Dorsal and ventral sides shown for each mutant.
