# Supplementary material for: Cortex cis-regulatory switches establish scale colour identity and pattern diversity in Heliconius
Source: bioRxiv or medRxiv preprint supplement (doi:10.1101/2020.05.26.116533), 2021-03-17
Supplement: Supplementary file [file media-9.pdf]

**Supplementary File 9:** Broad effects of *cortex* across *Heliconius* wings.

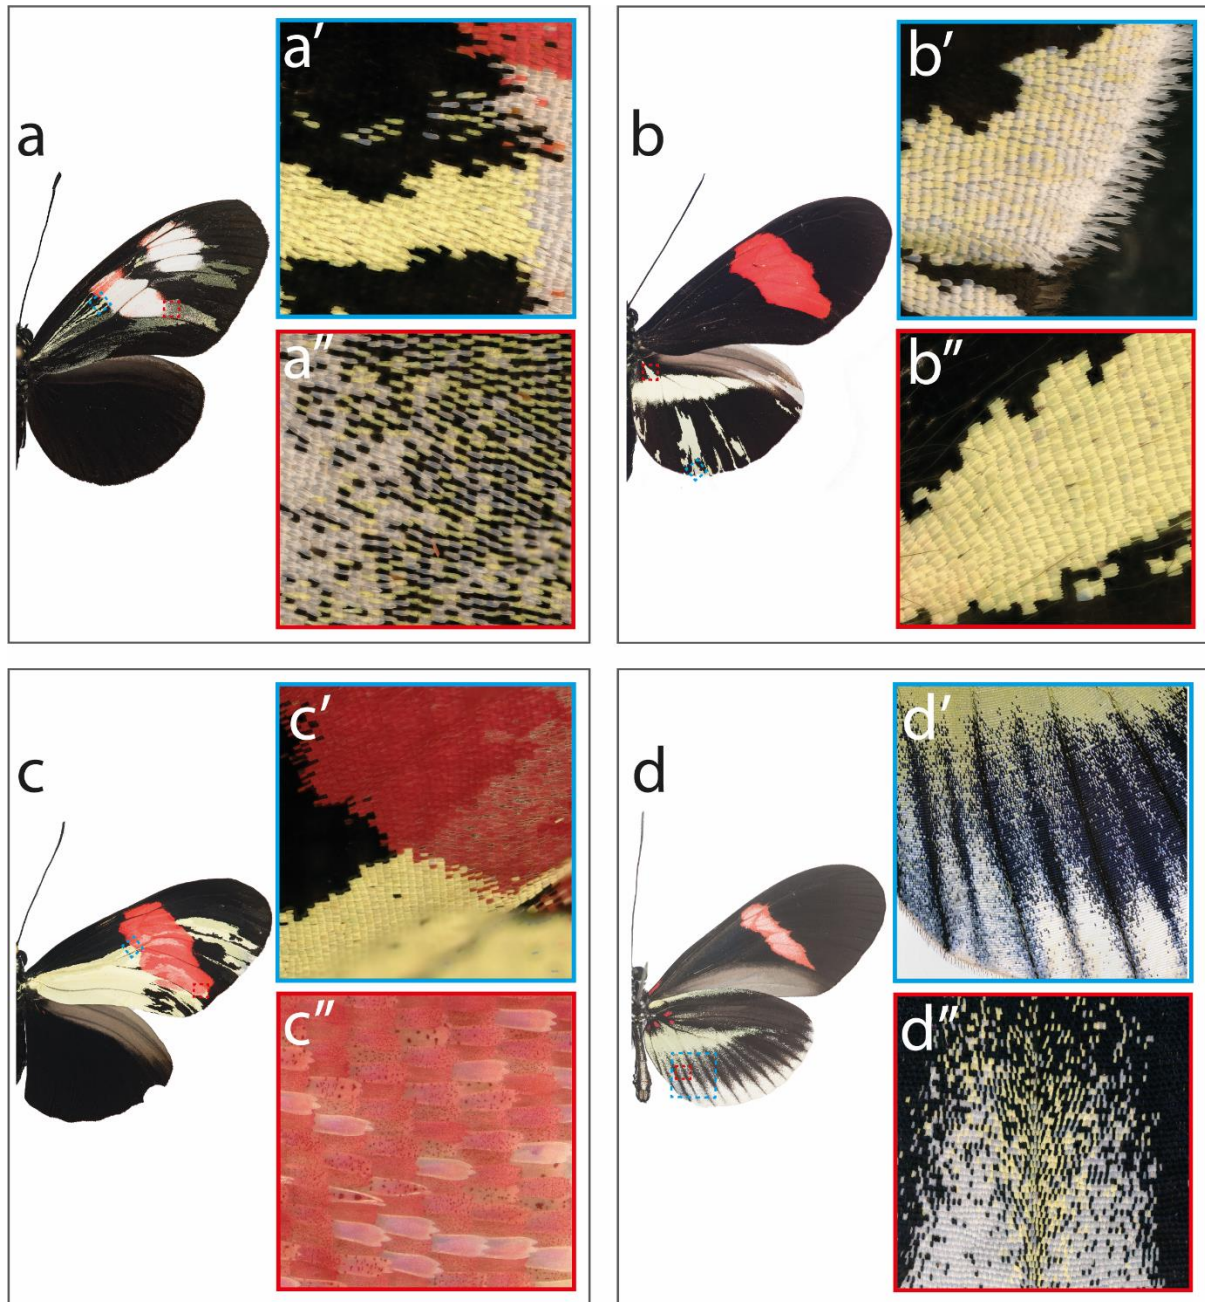

**Figure S9:** Mutant close-ups illustrating variety of effects caused by *cortex* mKO. (a) *H. melpomene plesseni* showing mutant clones across proximal forewing (a') as well as more distal areas, where cover scales are more affected (a''). Several individuals show this effect (see supplementary file 7). (b) *H. erato demophon* showing cortex mKO effects on elongated border scales (b'), and scale located anterior to yellow bar element (b''). (c) *H. erato hydara* showing clones extending into forewing red band (c') and asymmetric deposition of red pigment across the affected red band region (c''). (d) *H. erato cyrbia* illustrates positional effect of cort mKO where posterior hindwing scales shift to white, while anterior scales shift to yellow (d' and d'').
