# Supplementary material for: Cortex cis-regulatory switches establish scale colour identity and pattern diversity in Heliconius
Source: bioRxiv or medRxiv preprint supplement (doi:10.1101/2020.05.26.116533), 2021-03-17
Supplement: Supplementary file [file media-10.pdf]

**Supplementary File 10:** No correlation between yellow bar and Cortex localisation in *H. erato demophoon* pupal wings.

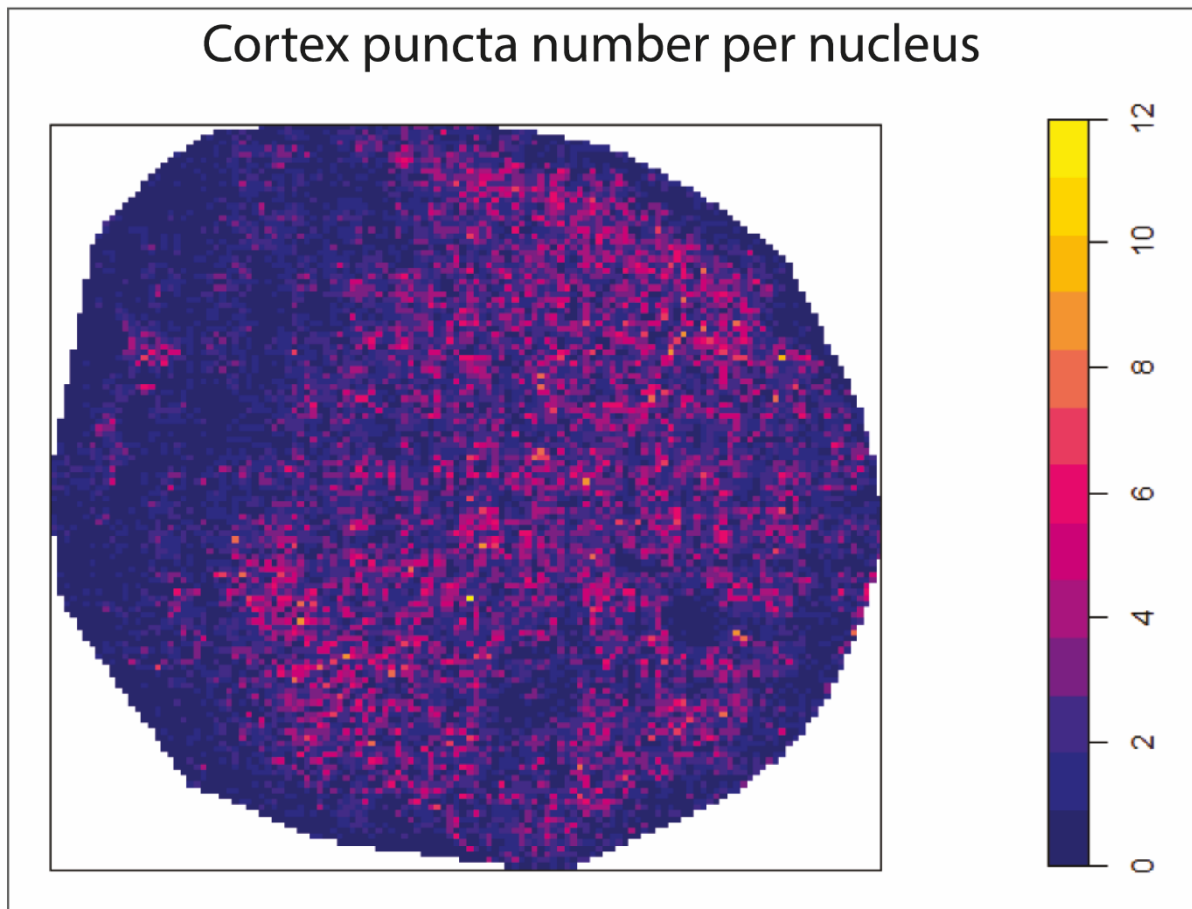

**Figure S10:** Cortex localisation events (puncta) are measured per nucleus/nucleolous by overlaying DAPI signals to Cortex signals, and identifying Cortex puncta that co-occur with DAPI. Each event was extracted on the basis of its co-ordinates, and plotted as a heatmap of Cortex puncta number per nucleus/nucleolous. No correlation with the yellow bar is observed, and cortex appears to be homogenously localised throughout the wing surface, while absent from the most proximal region.
