# Supplementary material for: Cortex cis-regulatory switches establish scale colour identity and pattern diversity in Heliconius
Source: bioRxiv or medRxiv preprint supplement (doi:10.1101/2020.05.26.116533), 2021-03-17
Supplement: Supplementary file [file media-11.pdf]

**Supplementary File 11: Scale measurements support homeosis of mutant scales to Type I scales.**

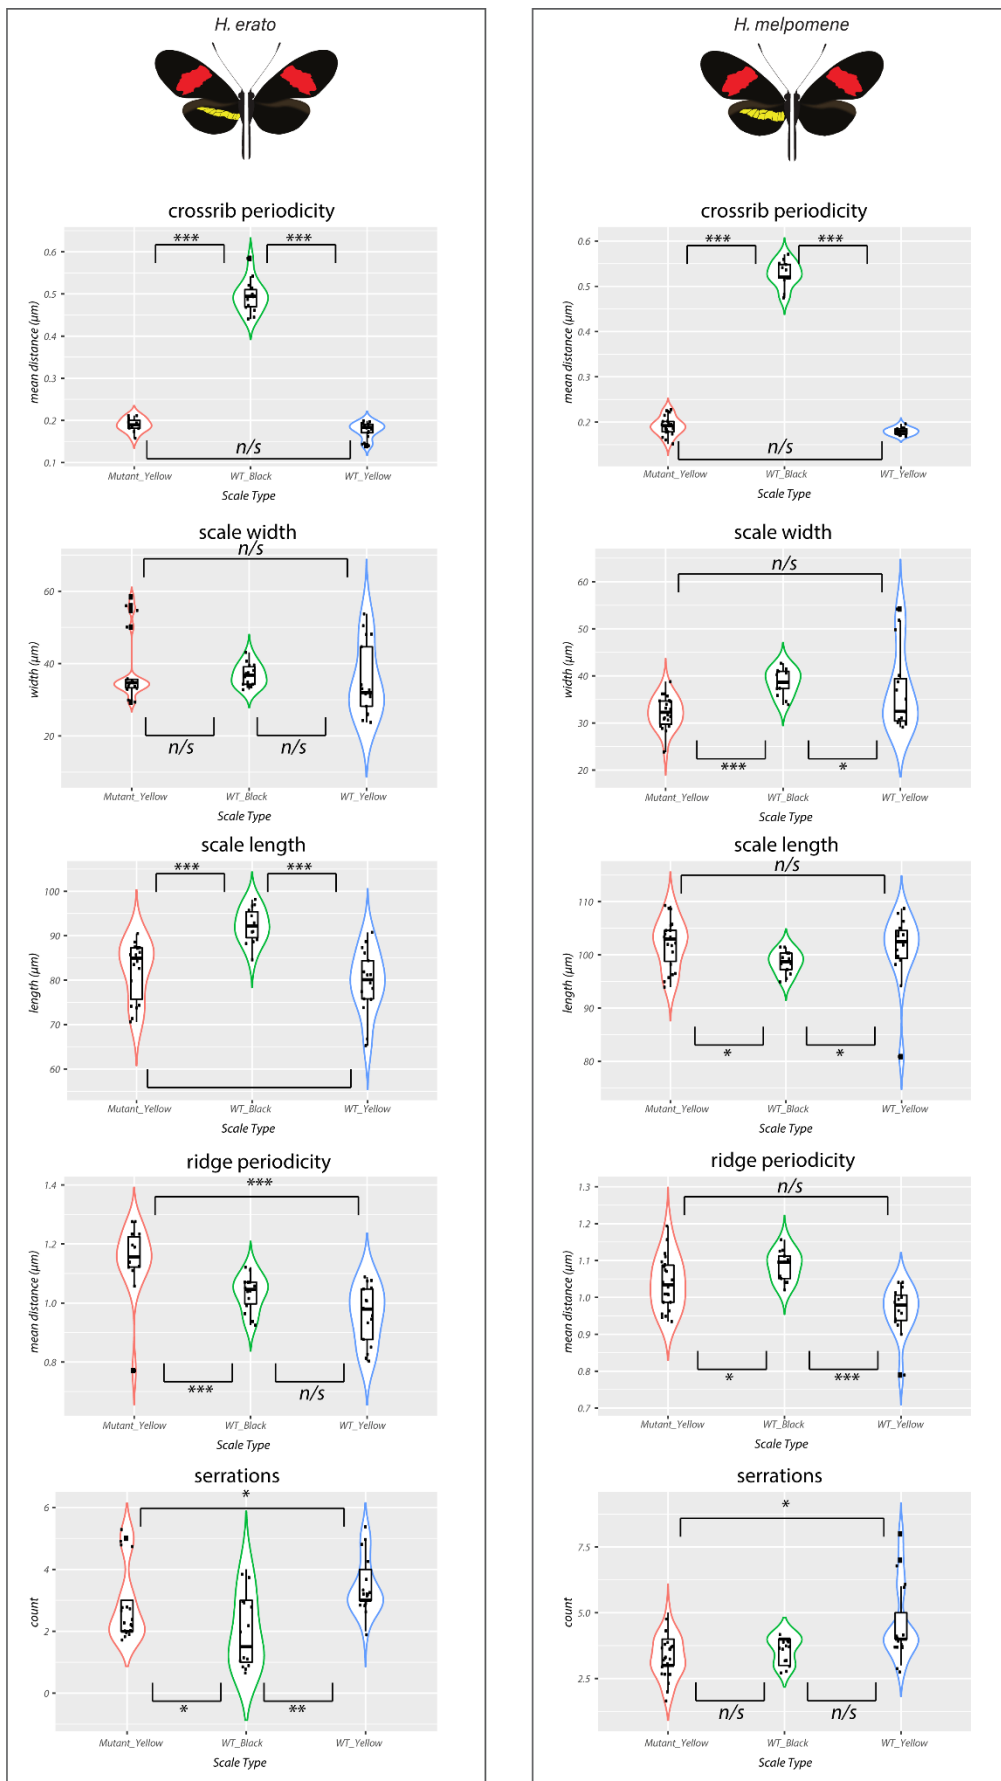

**Figure S11:** Nano-morphometric measures for *H. erato* and *H. melpomene* between wild-type and cortex mKO scales. Crossrib periodicity (measured as average distance between cross-ribs), is consistent with homeosis in both *H. melpomene* and *H. erato*. Total scale width suggests homeosis only in *H. melpomene*, while scale length was only significant in *H. erato*. Ridge periodicity was significantly different across all scale types in *H. erato*, while consistent with homeosis in *H. melpomene*. Serration count was not consistent with homeosis in either species.
